# Supplementary material for: Evaluation of a new protocol for enzymatic dynamic kinetic resolution of 3-hydroxy-3-(aryl)propanoic acids
Source: Royal Society of Chemistry journal article supplement (doi:10.1039/c5ob01380a), 2015-01-01

## SUPPORTING INFORMATION

### Evaluation of the new protocol to enzymatic dynamic kinetic resolution of 3-hydroxy-3-(aryl)propanoic acids

Dominik Koszelewski, Małgorzata Zysk, Daniel Paprocki, Anna Brodzka, Anna Żądło, Ryszard Ostaszewski\*

#### Experimental

All the chemicals were obtained from commercial sources. The solvents were of analytical grade. Amano lipase PS-C I from *Pseudomonas cepacia* (immobilized on ceramic) and Amano lipase AK from *Pseudomonas fluorescens* were purchased from Sigma-Aldrich. Novozym 435 was purchased from Novo Nordisk. Goose liver was converted to the acetone powder (GLAP) by the method of Connors *et al.*<sup>1</sup> NMR spectra were recorded in CDCl<sub>3</sub> or DMSO-D<sub>6</sub> with TMS as an internal standard using 200 and 400 MHz spectrometers. The chemical shifts are reported in ppm ( $\delta$  scale) and the coupling constants (*J*) are given in hertz (Hz). The HPLC analyses were performed on Chiralcel OD-H, Chiralcel OB, and Chiralcel IA-H chiral columns. ( $\varnothing$  4.6 mm x 250 mm, from Diacel Chemical Ind., Ltd) equipped with a pre-column ( $\varnothing$  4 mm x 10 mm, 5  $\mu$ m) using an LC-6A Varian ProStar apparatus with UV Varian ProStar 330 detector and Chromatopac C-R6A analyser. The mobile phase was hexane/isopropanol and the flow rate 1 mL/min,  $\lambda$ =254 nm. Melting points are uncorrected. Optical rotations were measured in 1-dm cell of 1 mL capacity using Jasco DIP-360 polarimeter operating at 589 nm. The elemental analyses were performed on CHN Perkin-Elmer 240 apparatus. All the reactions were monitored by TLC on Merck silica gel Plates 60 F<sub>254</sub>. Column chromatography was performed on Merck silica gel 60/230–400 mesh. Enzymatic reactions were performed in a vortex mixture (Heidolph Promax 1020) equipped with incubator (Heidolph Inkubator 1000).

#### Synthesis of ethyl *rac*-3-hydroxy-3-(4-methoxyphenyl)propanoate

Sodium borohydride (NaBH<sub>4</sub>) (208 mg, 5.05 mmol) was added to ethyl 3-(4-methoxyphenyl)-3-oxopropionate (1.11 g, 5.05 mmol) in ethanol (30 mL) at 0 °C. After 3 hours, reaction was quenched with saturated aqueous ammonium chloride (30 mL) and the separated aqueous phase was extracted with ethyl acetate (3 x 30 mL). The combined organic layer was dried over anhydrous magnesium sulphate (MgSO<sub>4</sub>) and evaporated in vacuum. The crude product was purified by column chromatography (ethyl acetate/hexanes). Ester was obtained with 77% yield (0.85 g) as a colourless oil; <sup>1</sup>H NMR (400 MHz, CDCl<sub>3</sub>)  $\delta$  1.24 (t, *J* = 7.2 Hz, 3H), 2.64 (dd, *J* = 16.4, 4.0 Hz, 1H), 2.78 (dd, *J* = 16.4, 9.2 Hz, 1H), 3.40 (br s, 1H), 3.78 (s, 3H), 4.20 (q, *J* = 7.2 Hz, 2H), 5.05 (dd, *J* = 9.2, 4.0 Hz, 1H), 6.86 (d, *J* = 8.8 Hz, 2H), 7.27 (d, *J* = 8.3 Hz, 2H); <sup>13</sup>C NMR (100 MHz, CDCl<sub>3</sub>)  $\delta$  14.1, 43.3, 55.2, 60.7, 69.7, 113.9, 126.8, 134.8, 159.0, 172.3. The <sup>1</sup>H and <sup>13</sup>C NMR data were in accordance with those reported in the literature.<sup>2</sup> HPLC: Chiralcel OB; hexane/isopropanol (9:1), retention time of the racemic compound (in min): *t*<sub>R</sub> (S) = 14.86, *t*<sub>R</sub> (R) = 25.78.

#### Synthesis of *rac*-3-hydroxy-3-(4-methoxyphenyl)propanoic acid

**General procedure A:** Ethyl *rac*-3-hydroxy-3-(4-methoxyphenyl)propanoate (0.4 g, 1.78 mmol) was dissolved in ethanol (1 mL), aqueous solution of NaOH (1N, 10 mL) was added and stirred vigorously for 3 hours at ambient temperature. Ethanol was removed under reduced pressure. Aqueous phase was first washed with ethyl acetate (3x30 mL), acidified with conc. hydrochloric acid to pH 2, and extracted with ethyl acetate (3x30 mL). The combined organic layer was dried over anhydrous magnesium sulfate (MgSO<sub>4</sub>) and evaporated in vacuum. The crude product was purified by crystallization from ethyl ether/hexanes (98% yield, 0.34 g); mp 81–83 °C (Lit 78–82 °C<sup>3</sup>); <sup>1</sup>H NMR (200 MHz, CDCl<sub>3</sub>)  $\delta$  2.70–2.85 (m, 2H), 3.84 (s, 3H), 5.15 (dd, *J* = 4.4, 8.5 Hz, 1H), 6.92 (d, *J* = 8.8 Hz, 2H), 7.34 (d, *J* = 8.8 Hz, 2H); <sup>13</sup>C NMR (50 MHz, CDCl<sub>3</sub>)  $\delta$  43.3, 55.6, 114.3, 127.3, 134.6, 177.2. The <sup>1</sup>H and <sup>13</sup>C NMR data were in accordance with those reported in the literature.<sup>3</sup>

#### Synthesis of ethyl *rac*-3-hydroxy-3-phenylpropanoate

Ethyl 3-oxo-3-phenylpropanoate (2.4 g, 12.5 mmol) was dissolved in ethanol (30 mL), sodium borohydride (425 mg, 12.5 mmol) was added portion wise at 0 °C. After the completion of the reaction (TLC, approx. 3 hours) the pH was adjusted to 6.0 with 5% hydrochloric acid (HCl). The ethanol was evaporated in vacuum and the mixture was extracted with DCM (3x50 mL). The combined organic layer was dried over anhydrous magnesium sulphate (MgSO<sub>4</sub>) and evaporated in vacuum. The crude product was purified by column chromatography (ethyl acetate/hexanes) to yield ester with 85% (2.06 g) as a colourless oil; <sup>1</sup>H NMR (200 MHz, CDCl<sub>3</sub>)  $\delta$  1.26 (t, 3H, *J* = 7.2 Hz), 2.71 (dd, *J* = 16.4, 4.4 Hz, 1H), 2.74 (dd, *J* = 16.3, 8.3 Hz, 1H), 3.36 (br s, 1H), 4.17 (q, 2H, *J* = 7.2 Hz), 5.13 (dd, *J* = 8.3, 4.4 Hz, 1H), 7.30–7.41 (m, 5H); <sup>13</sup>C NMR (50 MHz, CDCl<sub>3</sub>)  $\delta$  14.4, 43.6, 61.1, 70.6, 125.9, 128.1, 128.8, 142.8, 172.7. The <sup>1</sup>H and <sup>13</sup>C NMR data were in accordance with those reported in the literature.<sup>2</sup> HPLC: Chiralcel OD-H; hexane/isopropanol (9:1), retention time of the racemic compound (in min): *t*<sub>R</sub> (S) = 8.67, *t*<sub>R</sub> (R) = 11.27.

#### Synthesis of *rac*-3-hydroxy-3-phenylpropanoic acid

<sup>1</sup>Connors, W. M.; Pihl, A.; Dounce, A. L.; Stotz, E. *J. Biol. Chem.* **1950**, 184, 29.

<sup>2</sup>Cozzi, P. G.; Benfatti, F.; Capdevila, M. G.; Mignogna, A. *Chem. Commun.* **2008**, 3317–3318.

<sup>3</sup>Downey, C. W.; Johnson, M. W.; Lawrence, D. H.; Fleisher, A. S.; Tracy, K. J. *J. Org. Chem.* **2010**, 75, 5351–5354.

*rac*-3-Hydroxy-3-phenylpropanoic acid was obtained according to **General procedure A** with 99% yield (290 mg) as a white crystals; mp 90-92 °C (Lit 89-90 °C<sup>3</sup>); <sup>1</sup>H NMR (200 MHz, CDCl<sub>3</sub>) δ 2.70 (dd, *J* = 5.2, 15.3 Hz, 1H), 2.74 (dd, *J* = 8.2, 15.3 Hz, 1H), 5.17 (dd, *J* = 5.2, 8.2 Hz, 1H), 7.28-7.41 (m, 5H); <sup>13</sup>C NMR (50 MHz, CDCl<sub>3</sub>) δ 43.7, 70.1, 125.8, 127.1, 128.1, 143.8, 172.4. The <sup>1</sup>H and <sup>13</sup>C NMR data were in accordance with those reported in the literature.<sup>3</sup>

#### Synthesis of ethyl *rac*-3-hydroxy-3-(2-fluorophenyl)propanoate

**General procedure B:** Triethylamine (0.56 mL, 4.0 mmol, 1 equiv.) was added to a stirred mixture of 2-fluorobenzaldehyde (421 μL, 4.0 mmol, 1 equiv.), malonic acid half ethyl ester (582 mg, 4.4 mmol, 1.1 equiv.) and *N,N*-dimethylformamide (DMF) (10 mL). This mixture was stirred for 20 hours at 80 °C. Volatile compounds were removed under vacuum. The residue was diluted in ether/dichloromethane (1:1, 40 mL), washed with aqueous saturated sodium bicarbonate (NaHCO<sub>3</sub>), then with HCl (1 N). The combined organic layer was dried over anhydrous magnesium sulfate (MgSO<sub>4</sub>) and evaporated in vacuum, and the residue was purified by column chromatography (ethyl acetate/hexanes) to yield ester with 69% (586 mg) as a colourless oil; <sup>1</sup>H NMR (400 MHz, CDCl<sub>3</sub>) δ 1.19 (t, *J* = 7.2 Hz, 3H), 2.642 (dd, 16.8, 9.2 Hz, 1H), 2.73 (dd, 16.8, 3.4 Hz, 1H), 3.62 (br s, 1H), 4.12 (q, *J* = 7.2 Hz, 2H), 5.33 (dd, 8.8, 3.4 Hz, 1H), 6.92-6.95 (m, 1H), 7.07-7.11 (m, 1H), 7.19-7.21 (m, 1H), 7.48-7.50 (m, 1H); <sup>13</sup>C NMR (100 MHz, CDCl<sub>3</sub>) δ 14.1, 41.8, 60.9, 64.5, 115.1, 115.3, 124.3, 124.4, 127.2, 127.3, 129.0, 129.1, 129.3, 158.2, 160.6, 172.3. The <sup>1</sup>H and <sup>13</sup>C NMR data were in accordance with those reported in the literature;<sup>4</sup> Elemental Anal. Calcd. for C<sub>11</sub>H<sub>13</sub>FO<sub>3</sub>: C 62.26, H 6.17; Found: C 62.31, H 6.08; MS (ESI): Calcd. for C<sub>11</sub>H<sub>13</sub>FO<sub>3</sub>Na [M+Na]<sup>+</sup>, 235.07, Found 235.10; HPLC: Chiralcel OD-H; hexane/isopropanol (9:1), retention time of the racemic compound (in min): t<sub>R</sub> (S) = 6.60, t<sub>R</sub> (R) = 9.01.

#### Synthesis of *rac*-3-hydroxy-3-(2-fluorophenyl)propanoic acid

*rac*-3-Hydroxy-3-(2-fluorophenyl)propanoic acid was obtained according to **General procedure A** with 96% yield (344 mg) as a white crystals; mp 70-71 °C (Lit 68.85 °C<sup>5</sup>); <sup>1</sup>H NMR (200 MHz, CDCl<sub>3</sub>) δ 2.75-2.82 (m, 2H), 5.38-5.45 (m, 1H), 6.99-7.49 (m, 4H); <sup>13</sup>C NMR (50 MHz, CDCl<sub>3</sub>) δ 42.0, 64.8, 115.4, 115.8, 124.6, 127.4, 129.2, 129.4, 129.5, 129.7, 157.2, 162.1, 177.3; Elemental Anal. Calcd. for C<sub>9</sub>H<sub>9</sub>FO<sub>3</sub>: C 58.70, H 4.93; Found: C 58.47, H 5.07; MS (ESI): Calcd. for C<sub>9</sub>H<sub>9</sub>FO<sub>3</sub> [M-H]<sup>-</sup>, 183.04, Found 183.0.

#### Synthesis of ethyl *rac*-3-hydroxy-3-(2-bromophenyl)propanoate

Ethyl *rac*-3-hydroxy-3-(2-bromophenyl)propanoate was obtained according to **General procedure B** with 72% yield (786 mg) as a colourless oil; <sup>1</sup>H NMR (400 MHz, CDCl<sub>3</sub>) δ 1.28 (t, 3H, *J* = 7.2 Hz), 2.56 (dd, *J* = 16.8, 9.8 Hz, 1H), 2.87 (dd, *J* = 16.8, 2.8 Hz, 1H), 3.60 (br s, 1H), 4.21 (q, 2H, *J* = 7.2 Hz), 5.44 (dd, *J* = 9.8, 2.8 Hz, 1H), 7.14-7.15 (m, 1H), 7.31-7.34 (m, 1H), 7.50-7.52 (m, 1H), 7.57-7.59 (m, 1H); <sup>13</sup>C NMR (100 MHz, CDCl<sub>3</sub>) δ 14.1, 41.4, 60.3, 69.2, 121.4, 127.3, 127.8, 129.0, 132.6, 141.4, 172.4. The <sup>1</sup>H and <sup>13</sup>C NMR data were in accordance with those reported in the literature<sup>4</sup>; MS (ESI): Calcd. for C<sub>11</sub>H<sub>13</sub>BrO<sub>3</sub>Na [M+Na]<sup>+</sup>, 294.9, Found 295.0; HPLC: Chiralcel OD-H; hexane/isopropanol (9:1), retention time of the racemic compound (in min): t<sub>R</sub> = 7.77, t<sub>R</sub> = 14.56.

#### Synthesis of *rac*-3-hydroxy-3-(2-bromophenyl)propanoic acid

*rac*-3-Hydroxy-3-(2-bromophenyl)propanoic acid was obtained according to **General procedure A** with 93% yield (278 mg) as a white crystals; mp 90-91 °C (Lit. 89 °C (diethyl ether/hexane)<sup>6</sup>); <sup>1</sup>H NMR (200 MHz, CDCl<sub>3</sub>) δ 2.62 (dd, *J* = 16.8, 10.0 Hz, 1H), 2.93 (dd, *J* = 16.8, 2.6 Hz, 1H), 5.75 (dd, *J* = 9.8, 2.6 Hz, 1H), 6.15 (br s, 1H), 7.11-7.18 (m, 1H), 7.30-7.40 (m, 1H), 7.50-7.64 (m, 2H); <sup>13</sup>C NMR (50 MHz, CDCl<sub>3</sub>) δ 41.7, 69.4, 121.7, 127.5, 128.2, 129.6, 133.0, 141.3, 177.5; MS (ESI): Calcd. for C<sub>9</sub>H<sub>8</sub>BrO<sub>3</sub> [M-H]<sup>-</sup>, 242.9, Found 242.9.

#### Synthesis of ethyl *rac*-3-(4-cyanophenyl)-3-hydroxypropanoate

Ethyl *rac*-3-hydroxy-3-(4-cyanophenyl)propanoate was obtained according to **General procedure B** with 75% yield (658 mg) as a colourless oil; <sup>1</sup>H NMR (400 MHz, CDCl<sub>3</sub>) δ 1.26 (t, *J* = 8.0 Hz, 3H), 2.71 (dd, *J* = 8.0, 4.0 Hz, 2H), 3.65 (br s, 1H), 4.19 (q, *J* = 8.0 Hz, 2H), 5.17 (dd, *J* = 8.0, 4.0 Hz, 1H), 7.50 (d, 12 Hz, 2H), 7.64 (d, 12 Hz, 2H); <sup>13</sup>C NMR (100 MHz, CDCl<sub>3</sub>) δ 14.1, 42.9, 61.1, 69.5, 111.5, 118.6, 126.3, 132.3, 147.8, 171.9. The <sup>1</sup>H and <sup>13</sup>C NMR data were in accordance with those reported in the literature<sup>7</sup>; HPLC: Chiralcel OB; hexane/isopropanol (9:1), retention time of the racemic compound (in min): t<sub>R</sub> = 14.89, t<sub>R</sub> = 16.66.

#### Synthesis of *rac*-3-(4-cyanophenyl)-3-hydroxypropanoic acid

*rac*-3-Hydroxy-3-(4-cyanophenyl)propanoic acid was obtained according to **General procedure A** with 93% yield (278 mg) as a white crystals; mp 101-102 °C; <sup>1</sup>H NMR (400 MHz, DMSO-*d*<sub>6</sub>) δ 2.50 (dd, *J* = 8.0, 4.0 Hz, 2H), 5.00 (dd, *J* = 8.0, 4.0 Hz, 1H), 7.54 (d, *J* = 8.0 Hz), 7.76 (d, *J* = 8.0 Hz, 2H); <sup>13</sup>C NMR (100 MHz, DMSO-*d*<sub>6</sub>) δ 44.0, 68.9, 109.7, 118.8, 126.8, 132.0, 150.6, 171.8. The <sup>1</sup>H and <sup>13</sup>C NMR data were in accordance with those reported in the literature.<sup>8</sup>

<sup>4</sup> Ayil, A. I.; Condom, R.; Wade, T. N.; Guedj, R. *J. Fluorine Chem.* **1979**, *14*, 437-454.

<sup>5</sup> Leclercq, M.; Collet, A.; Jacques, J. *Tetrahedron* **1976**, *32*, 821-828.

<sup>6</sup> Collet, A. *Bull. Soc. Chim. Fr.* **1972**, 3857.

<sup>7</sup> Fernandez-Ibanez, M. A.; Macia, B.; Minnaard, A. J.; Feringa, B. L., *Angew. Chem. Int. Ed.* **2008**, *47*, 1317-1319.

<sup>8</sup> Zhu, D.; Ankati, H.; Mukherjee, C.; Yang, V.; Biehler, E. R.; Hua, L. *Org. Lett.* **2007**, *9*, 2560-2563.

### Synthesis of ethyl *rac*-3-hydroxy-3-(4-nitrophenyl)propanoate

To malonic acid monoethyl ester (90mg, 0.66 mmol) in acetonitrile (0.4 mL) was added the aldehyde (100mg, 0.66mmol) and then stirred at 80 °C for 15 h (under nitrogen). Reaction mixture was concentrated. The residue was dissolved in a mixture of diethyl ether/DCM (1/1), washed with saturated sodium bicarbonate, hydrochloric acid (1N), then dried over magnesium sulfate (MgSO<sub>4</sub>). The organic phase was concentrated. The residue (120 mg) was separated by chromatography on silica gel (ethyl acetate/hexanes). Product was obtained with 76% yield. <sup>1</sup>H NMR (400 MHz, CDCl<sub>3</sub>) δ 1.27 (t, *J* = 8.0 Hz, 3H), 2.72-2.78 (m, 2H), 3.66 (br s, 1H), 4.20 (q, *J* = 8.0 Hz, 2H), 5.23 (dd, *J* = 8.0, 4.0 Hz, 1H), 7.57 (d, *J* = 8.0 Hz, 2H), 8.21 (d, *J* = 8.0 Hz, 2H); <sup>13</sup>C NMR (100 MHz, CDCl<sub>3</sub>) δ 14.0, 42.9, 61.2, 69.3, 123.7, 126.4, 147.4, 149.6, 171.9. The <sup>1</sup>H and <sup>13</sup>C NMR data were in accordance with those reported in the literature.<sup>9</sup>HPLC: Chiralcel IA; hexane/isopropanol (9:1), retention time of the racemic compound (in min): t<sub>R</sub> (S) = 14.65, t<sub>R</sub> (R) = 16.00.

### Synthesis of *rac*-3-hydroxy-3-(4-nitrophenyl)propanoic acid

*rac*-3-Hydroxy-3-(4-nitrophenyl)propanoic acid was obtained according to **General procedure A** with 92% yield (292 mg) as a white crystals; mp 121-123 °C (Lit 119-122 °C<sup>3</sup>); <sup>1</sup>H NMR (400 MHz, DMSO-*d*<sub>6</sub>) δ 2.51-2.75 (m, 2H), 3.28 (br s, 1H), 5.05 (dd, *J* = 8.4, 5.2 Hz, 1H), 7.62 (d, *J* = 8.8 Hz, 1H), 8.16 (d, *J* = 8.8 Hz, 1H), 12.1 (br s, 1H); <sup>13</sup>C NMR (100 MHz, DMSO-*d*<sub>6</sub>) δ 44.4, 69.1, 123.7, 127.5, 147.0, 153.2, 172.2. The <sup>1</sup>H and <sup>13</sup>C NMR data were in accordance with those reported in the literature.<sup>8</sup>

### Synthesis of ethyl *rac*-3-hydroxy-3-(2,4-dinitrophenyl)propanoate

Ethyl *rac*-3-hydroxy-3-(2,4-dinitrophenyl)propanoate was obtained according to **General procedure B** with 69% yield (784 mg) as a colourless oil; <sup>1</sup>H NMR (500 MHz, CDCl<sub>3</sub>) δ 1.30 (t, 3H, *J* = 8.0 Hz), 2.62 (dd, *J* = 20.0, 12.0 Hz, 1H), 2.95 (dd, *J* = 20.0, 4.0 Hz, 1H), 4.00 (br s, 1H), 4.34 (q, 2H, *J* = 8.0 Hz), 5.77 (dd, *J* = 12.0, 4.0 Hz, 1H), 8.19 (d, *J* = 8.5 Hz, 1H), 8.47-8.49 (m, 1H), 8.83 (d, *J* = 8.5 Hz, 1H); <sup>13</sup>C NMR (125 MHz, CDCl<sub>3</sub>) δ 14.0, 41.9, 61.4, 65.9, 120.0, 127.7, 130.2, 144.6, 147.2, 171.8; Elemental Anal. Calcd. for C<sub>11</sub>H<sub>12</sub>N<sub>2</sub>O<sub>7</sub>: C 46.48, H 4.26, N 9.86; Found: C 46.52, H 4.19, N 9.75; HRMS (ESI): Exact mass calcd. for C<sub>11</sub>H<sub>12</sub>N<sub>2</sub>O<sub>7</sub>Na [M+Na]<sup>+</sup>, 307.0542, Found 307.0550; HPLC: Chiralcel AI; hexane/isopropanol (9:1), retention time of the racemic compound (in min): t<sub>R</sub> = 24.49, t<sub>R</sub> = 29.07.

### Synthesis of *rac*-3-hydroxy-3-(2,4-dinitrophenyl)propanoic acid

*rac*-3-Hydroxy-3-(2,4-dinitrophenyl)propanoic acid was obtained according to **General procedure A** with 98% yield (468 mg) as a semisolid; <sup>1</sup>H NMR (400 MHz, CDCl<sub>3</sub>/DMSO-*d*<sub>6</sub>) δ 2.50 (dd, *J* = 15.6, 8.8 Hz, 1H), 2.74 (dd, *J* = 15.6, 3.6 Hz, 1H), 5.34 (br s, 1H), 5.54 (dd, *J* = 8.8, 3.6 Hz, 1H), 6.08 (br s, 1H), 8.14 (d, *J* = 8.8 Hz, 1H), 8.56-8.59 (m, 1H), 8.73 (d, *J* = 8.8 Hz, 1H), 12.35 (br s, 1H); <sup>13</sup>C NMR (100 MHz, DMSO-*d*<sub>6</sub>) δ 43.9, 65.9, 120.3, 128.3, 131.3, 147.2, 147.4, 148.0, 172.3; HRMS (ESI): Exact mass calcd. for C<sub>9</sub>H<sub>7</sub>N<sub>2</sub>O<sub>7</sub>[M-H]<sup>-</sup>, 255.0261, Found 255.0253.

### Synthesis of ethyl *rac*-3-hydroxy-3-(2-nitro-4-fluorophenyl)propanoate

Ethyl *rac*-3-hydroxy-3-(2-nitro-4-fluorophenyl)propanoate was obtained according to **General procedure B** with 78% yield (803 mg) as a colourless oil; <sup>1</sup>H NMR (200 MHz, CDCl<sub>3</sub>) δ 1.27 (t, 3H, *J* = 7.2 Hz), 2.60 (dd, *J* = 16.8, 9.2 Hz, 1H), 2.93 (dd, *J* = 16.8, 2.8 Hz, 1H), 3.90 (br s, 1H), 4.20 (q, 2H, *J* = 7.2 Hz), 5.63 (dd, *J* = 3.4, 2.4 Hz, 1H), 7.34-7.43 (m, 1H), 7.66-7.72 (m, 1H), 7.87-7.94 (m, 1H); <sup>13</sup>C NMR (50 MHz, CDCl<sub>3</sub>) δ 14.4, 42.6, 61.5, 65.9, 111.9, 112.5, 121.2, 121.6, 130.4, 130.5, 172.6; Elemental Anal. Calcd. for C<sub>11</sub>H<sub>12</sub>NO<sub>5</sub>F: C 51.37, H 4.70, N 5.45; Found: C 51.15, H 4.82, N 5.37; HRMS (ESI): Exact mass calcd. for C<sub>11</sub>H<sub>12</sub>NO<sub>5</sub>NaF [M+Na]<sup>+</sup>, 280.0597, Found 280.0599; HPLC: Chiralcel OD-H; hexane/isopropanol (9:1), retention time of the racemic compound (in min): t<sub>R</sub> = 10.91, t<sub>R</sub> = 13.73.

### Synthesis of *rac*-3-hydroxy-3-(2-nitro-4-fluorophenyl)propanoic acid

*rac*-3-Hydroxy-3-(2-nitro-4-fluorophenyl)propanoic acid was obtained according to **General procedure A** with 94% yield (306 mg) as a semisolid; <sup>1</sup>H NMR (200 MHz, CDCl<sub>3</sub>) δ 2.61 (dd, *J* = 16.8, 9.2 Hz, 1H), 2.93 (dd, *J* = 16.8, 2.8 Hz, 1H), 5.70-5.76 (m, 1H), 7.38-7.42 (m, 1H), 7.62-7.71 (m, 1H), 7.82-7.92 (m, 1H); <sup>13</sup>C NMR (50 MHz, CDCl<sub>3</sub>) δ 42.9, 69.9, 115.5, 127.6, 140.0, 163.5, 172.2; Elemental Anal. Calcd. for C<sub>9</sub>H<sub>7</sub>FNO<sub>5</sub>: C 47.17, H 3.52, N 6.11; Found: C 46.82, H 3.78, N 5.96; MS (ESI): Calcd. for C<sub>9</sub>H<sub>7</sub>FNO<sub>5</sub> [M-H]<sup>-</sup>, 228.03, Found 228.0.

### Synthesis of ethyl 3-hydroxy-3-(2-nitro-4-trifluoromethylphenyl)propanoate

Ethyl *rac*-3-hydroxy-3-(2-nitro-4-trifluoromethylphenyl)propanoate was obtained according to **General procedure B** with 72% yield (885 mg) as a colourless oil; <sup>1</sup>H NMR (400 MHz, CDCl<sub>3</sub>) δ 1.30 (t, 3H, *J* = 8.0 Hz), 2.62 (dd, *J* = 16.0, 12.0 Hz, 1H), 2.98 (dd, *J* = 16.0, 4.0 Hz, 1H), 4.02 (br s, 1H), 4.24 (q, 2H, *J* = 8.0 Hz), 5.77 (d, *J* = 8.0 Hz, 1H), 8.20 (d, *J* = 8.0 Hz, 1H), 8.50 (dd, *J* = 8.0 Hz, 1H), 8.83 (d, *J* = 4.0 Hz, 1H); <sup>13</sup>C NMR (100 MHz, CDCl<sub>3</sub>) δ 14.1, 42.1, 61.3, 65.9, 121.8, 121.9, 129.5, 130.1, 131.4, 141.9, 172.0; Elemental Anal. Calcd. for C<sub>12</sub>H<sub>12</sub>F<sub>3</sub>NO<sub>5</sub>: C 46.91, H 3.94, N 4.56; Found: C 47.02, H 3.90, N 4.33; HRMS (ESI): Exact mass calcd. for C<sub>12</sub>H<sub>12</sub>F<sub>3</sub>NO<sub>5</sub>Na [M+Na]<sup>+</sup>, 330.0565, Found 330.0559; HPLC: Chiralcel OB; hexane/isopropanol (9:1), retention time of the racemic compound (in min): t<sub>R</sub> = 8.41, t<sub>R</sub> = 10.64.

### Synthesis of *rac*-3-hydroxy-3-(2-nitro-4-trifluoromethylphenyl)propanoic acid.

<sup>9</sup>Salvi, N. A; Chattopadhyay, S. *Bioorg. Med. Chem.* **2006**, *14*, 4918-4922.

*rac*-3-Hydroxy-3-(2-nitro-4-trifluoromethylphenyl)propanoic acid was obtained according to **General procedure A** with 89% yield (275 mg) as a semisolid; <sup>1</sup>H NMR (400 MHz, DMSO-*d*<sub>6</sub>) δ 2.57 (dd, *J* = 12.0, 8.0 Hz, 1H), 2.73 (dd, *J* = 12.0, 4.0 Hz, 1H), 5.50 (dd, *J* = 8.4, 4.0 Hz, 1H), 5.98 (br s, 1H), 8.10 (d, *J* = 8 Hz, 1H), 8.15 (dd, *J* = 8.4, 1.2 Hz, 1H), 8.33 (d, *J* = 1.2 Hz, 1H), 12.3 (br s, 1H); <sup>13</sup>C NMR (100 MHz, DMSO-*d*<sub>6</sub>) δ 43.6, 65.5, 130.6, 148.0, 171.9; HRMS (ESI): Exact mass calcd. for C<sub>10</sub>H<sub>7</sub>F<sub>3</sub>NO<sub>5</sub> [M-Na]<sup>+</sup>, 278.0275, Found 278.0276.

#### Enzymatic kinetic resolution of *rac*-3-hydroxy-3-(aryl)propanoic acids

To the solution of acid **1a-h** (0.1 mmol) in organic solvent (2 mL), triethylorthoobenzoate (2 equiv.) and enzyme (native 5 mg or immobilized 10 mg) were added in 5mL screwed vial. The reaction mixture was stirred for 72 hours at 40°C in a vortex mixture (HeidolphPromax 1020) equipped with incubator (HeidolphInkubator 1000). After cooling crude product was isolated and purified by column chromatography (ethyl acetate/hexanes). The <sup>1</sup>H NMR data were in accordance with those recorded for racemates; (*R*)-(+)-**2a**: [α]<sub>D</sub><sup>20</sup> = +21.5 (c 1.00 CHCl<sub>3</sub>, 60% *ee*), Lit (*R*) enantiomer: [α]<sub>D</sub><sup>20</sup> = +28.8 (c 1.0, CHCl<sub>3</sub>);<sup>10</sup>(*R*)-(+)-**2b**: [α]<sub>D</sub><sup>20</sup> = +40.2 (c 1.00 CHCl<sub>3</sub>, 63% *ee*), Lit (*R*) enantiomer: [α]<sub>D</sub><sup>20</sup> = +48.9 (c 0.89, CHCl<sub>3</sub>);<sup>11</sup> (*R*)-(+)-**2c**: [α]<sub>D</sub><sup>20</sup> = +34.6 (c 1.00 CHCl<sub>3</sub>, 68% *ee*), Lit (*S*) enantiomer: [α]<sub>D</sub><sup>20</sup> = -49.7 (c 2.71, CHCl<sub>3</sub>);<sup>9</sup> (+)-**2g**: [α]<sub>D</sub><sup>20</sup> = +25.2 (c 1.00 CHCl<sub>3</sub>, 83% *ee*); (+)-**2h**: [α]<sub>D</sub><sup>20</sup> = +16.3 (c 1.00 CHCl<sub>3</sub>, 52% *ee*); (+)-**2i**: [α]<sub>D</sub><sup>20</sup> = +12.8 (c 1.00 CHCl<sub>3</sub>, 62% *ee*).

#### Synthesis (dynamic kinetic resolution) of ethyl (*S*)-3-hydroxy-3-(4-nitrophenyl)propanoate and ethyl (*R*)-3-hydroxy-3-(4-nitrophenyl)propanoate

To the solution of acid (0.1 mmol) in organic solvent (2 mL), triethylorthoobenzoate (2 equiv.), enzyme (native 5 mg or immobilized 10 mg) and metal catalyst (10 mol%) were added in 5mL vial. The reaction mixture was stirred for 72 hours at 40°C in vortex mixture (HeidolphPromax 1020) equipped with incubator (HeidolphInkubator 1000). After cooling, crude product was isolated and purified by column chromatography (ethyl acetate/hexanes). The <sup>1</sup>H NMR data were in accordance with those recorded for racemates; (*S*)-(-)-**2f**: [α]<sub>D</sub><sup>20</sup> = -59.5 (c 1.5, CHCl<sub>3</sub>); Lit (*R*) enantiomer: [α]<sub>D</sub><sup>20</sup> = +23.1 (c 1.0, CHCl<sub>3</sub>).<sup>12</sup>

#### Racemization of ethyl (*S*)-3-hydroxy-3-(4-nitrophenyl)propanoate ((*S*)-**2a**)

To the solution of ester (*S*)-**2a** (0.1 mmol) in TBME (2 mL) were added (see Table 4 in main Text); triethylorthoobenzoate (2 mmol), enzyme (native 5 mg or immobilized 10 mg) and metal catalyst (10 mol%) were added in 5mL vial. The reaction mixture was stirred for 24 hours at 40°C in vortex mixture (HeidolphPromax 1020) equipped with incubator (HeidolphInkubator 1000). After cooling, crude product was purified by column chromatography (ethyl acetate/hexanes) and analysed on HPLC: Chiralcel IA; hexane/isopropanol (9:1), retention time of the racemic compound (in min): t<sub>R</sub> (*S*) = 14.65, t<sub>R</sub> (*R*) = 16.00.

#### Synthesis ethyl (*S*)-3-hydroxy-3-(4-nitrophenyl)propanoate- preparative scale

To the solution of acid **1a** (212 mg, 1 mmol) in TBME (20 mL), triethylorthoobenzoate (2 mmol), Amano AK (50 mg) and rhodium(II) acetate (10 mol%) was stirred for 72 hours at 40°C in vortex mixture (HeidolphPromax 1020) equipped with incubator (HeidolphInkubator 1000). Enzyme and catalyst were separated by filtration and washed with ethyl acetate. Combined organic phases were evaporated in vacuum and purified by column chromatography (ethyl acetate/hexanes). Product (*S*)-**2a** was obtained with 94% yield (225 mg) as a yellow oil.

#### Synthesis ethyl (*R*)-3-hydroxy-3-(2,4-nitrophenyl)propanoate- preparative scale

To the solution of acid **1c** (200 mg, 0.8mmol) in organic solvent (20 mL), triethylorthoobenzoate (2 mmol), Novozyme 435 (90 mg) and rhodium(II) acetate (10 mol%) was stirred for 72 hours at 40°C in vortex mixture (HeidolphPromax 1020) equipped with incubator (HeidolphInkubator 1000). Enzyme and catalyst were separated by filtration and washed with ethyl acetate. Combined organic phases were evaporated in vacuum and purified by column chromatography (ethyl acetate/hexanes). Product (*S*)-**2c** was obtained with 98% yield (228 mg) as a yellow oil.

#### Synthesis ethyl (*R*)-3-hydroxy-3-(phenyl)propanoate- preparative scale

To the solution of acid **1i** (200 mg, 1.2mmol) in organic solvent (20 mL), triethylorthoobenzoate (2 mmol), Novozyme 435 (100 mg) and rhodium(II) acetate (10 mol%) was stirred for 72 hours at 40°C in vortex mixture (HeidolphPromax 1020) equipped with incubator (HeidolphInkubator 1000). Enzyme and catalyst were separated by filtration and washed with ethyl acetate. Combined organic phases were evaporated in vacuum and purified by column chromatography (ethyl acetate/hexanes). Product (*S*)-**2i** was obtained with 98% yield (246 mg) as a colourless oil.

<sup>10</sup>Brem, J.; Naghi, M.; Tosa, M. -I.; Boros, Z.; Poppe, L.; Irimie, F, -D.; Paizs, C. *Tetrahedron: Asymmetry* **2011**, *22*, 1672-1679.

<sup>11</sup>Kitanosono, T.; Xu, P.; Kobayashi, S. *Chem. Asian J.* **2014**, *9*, 179-188.

<sup>12</sup>Xu, Ch.; Yuan, Ch. *Tetrahedron* **2005**, *61*, 2169-2186.

- $^1\text{H}$  and  $^{13}\text{C}$  NMR spectra for 1a-i and 2a-i:

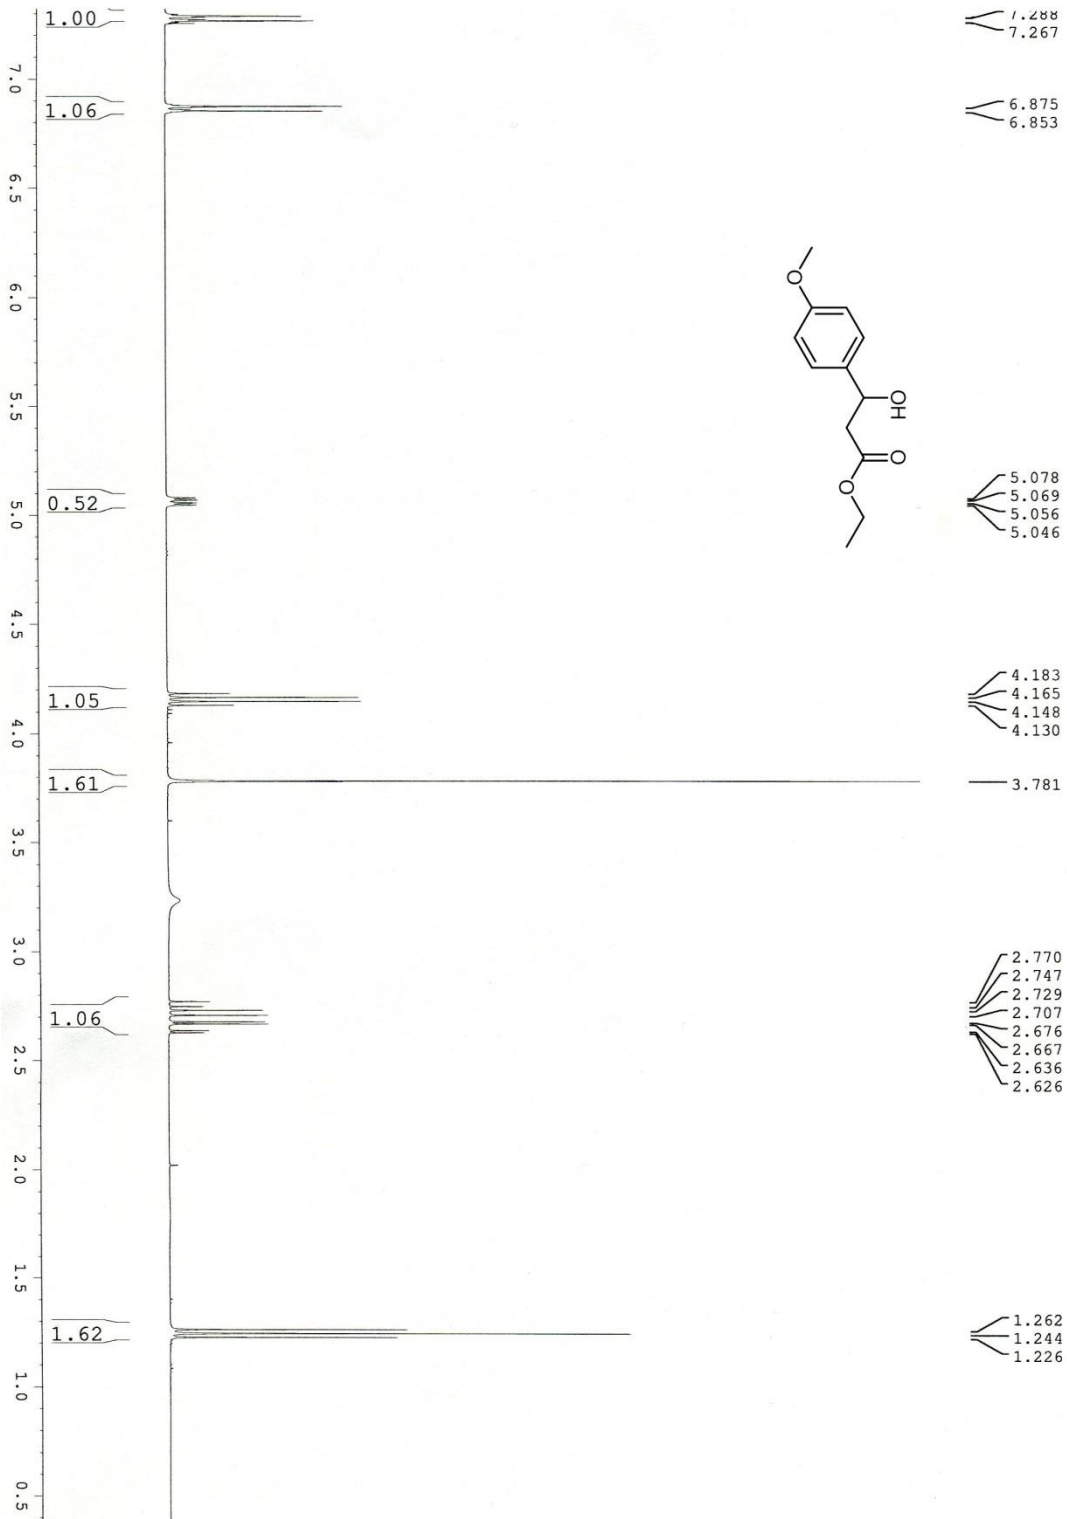

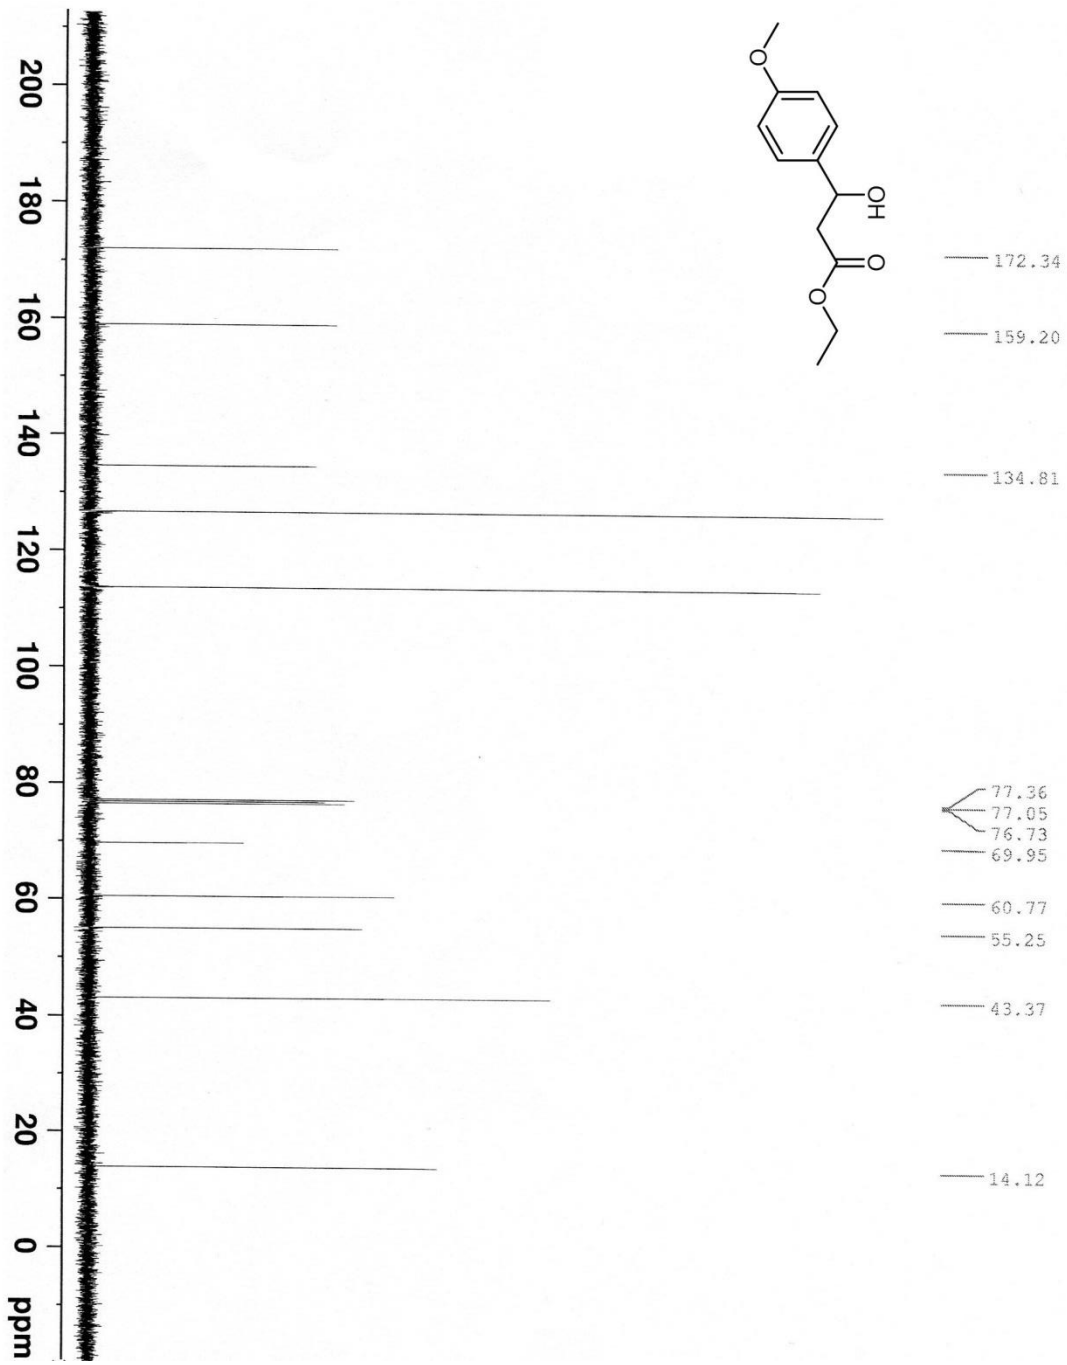





Relax. delay 0.100 sec  
Pulse 49.1 degrees  
Acq. time 4.000 sec  
Width 398.0 Hz  
Observer HI  
DATA PROCESSING  
FT size 65536  
Total time 0 min, 18 sec

Ambient temperature  
GEMINI-200BB "nmr200"

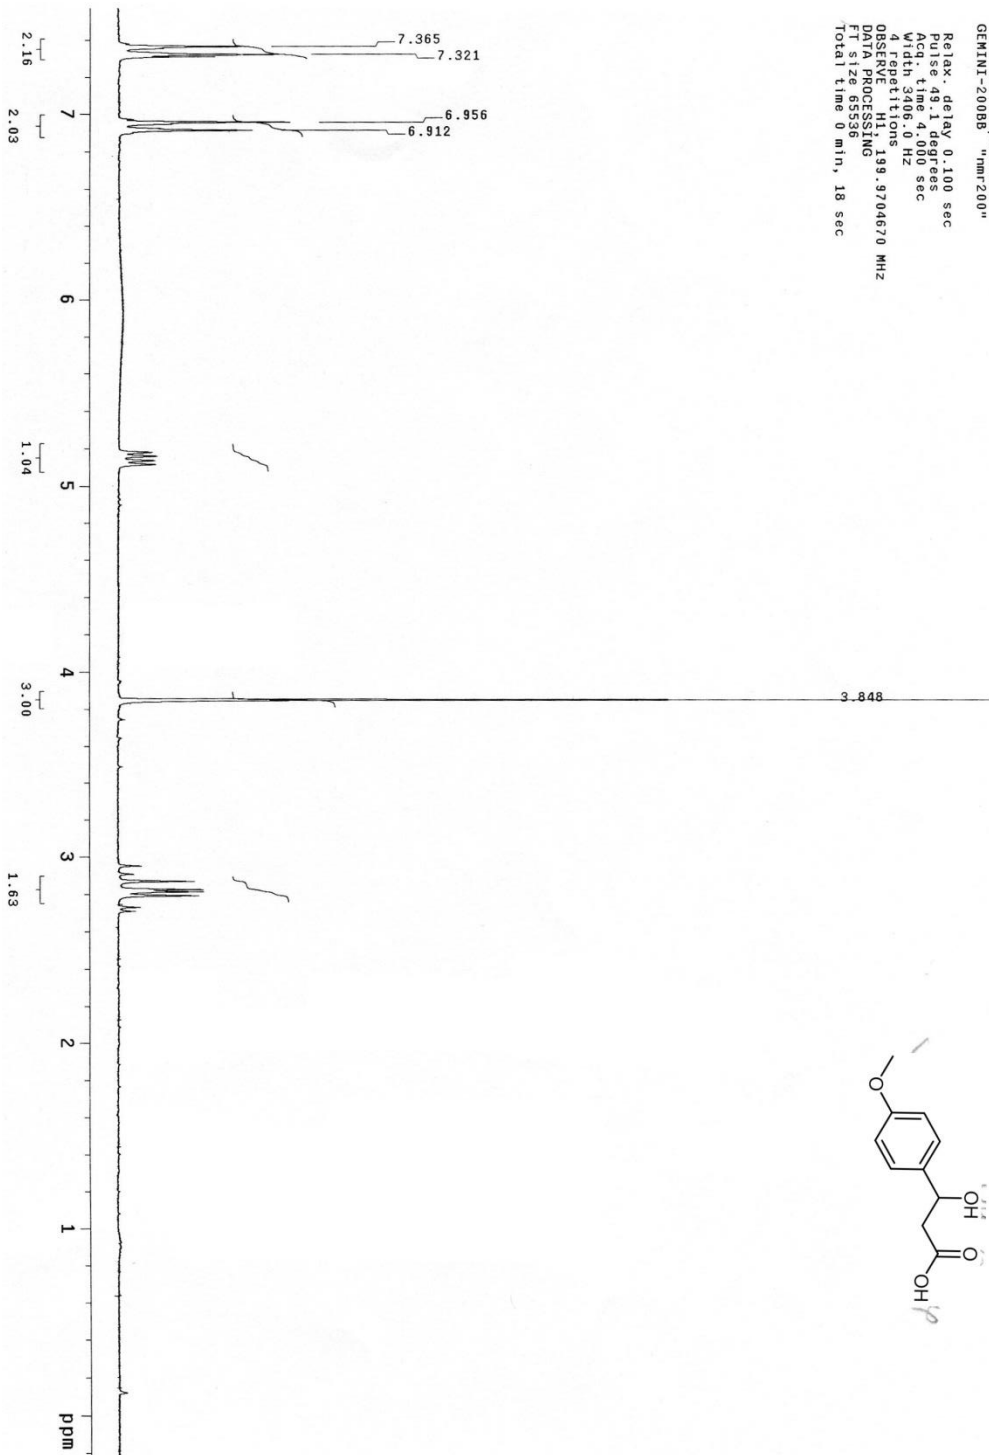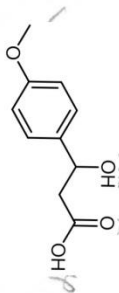



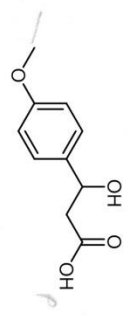

13C OBSERVE  
 Pulse Sequence: s2pu1  
 Solvent: CDCl3  
 Ambient temperature  
 GEMINI-20088 "nmr200"  
 Relax. delay 1.000 sec  
 Pulse 50.0 degrees  
 Acq. time 2.000 sec  
 Width 12500.0 Hz  
 OBSERVE C13  
 DECOUPLE H1, 199.9714782 MHz  
 Power 38 db  
 Continuously on  
 WALTZ-16 modulated  
 DATA PROCESSING  
 FT size 65536  
 Total time 55 min, 7 sec

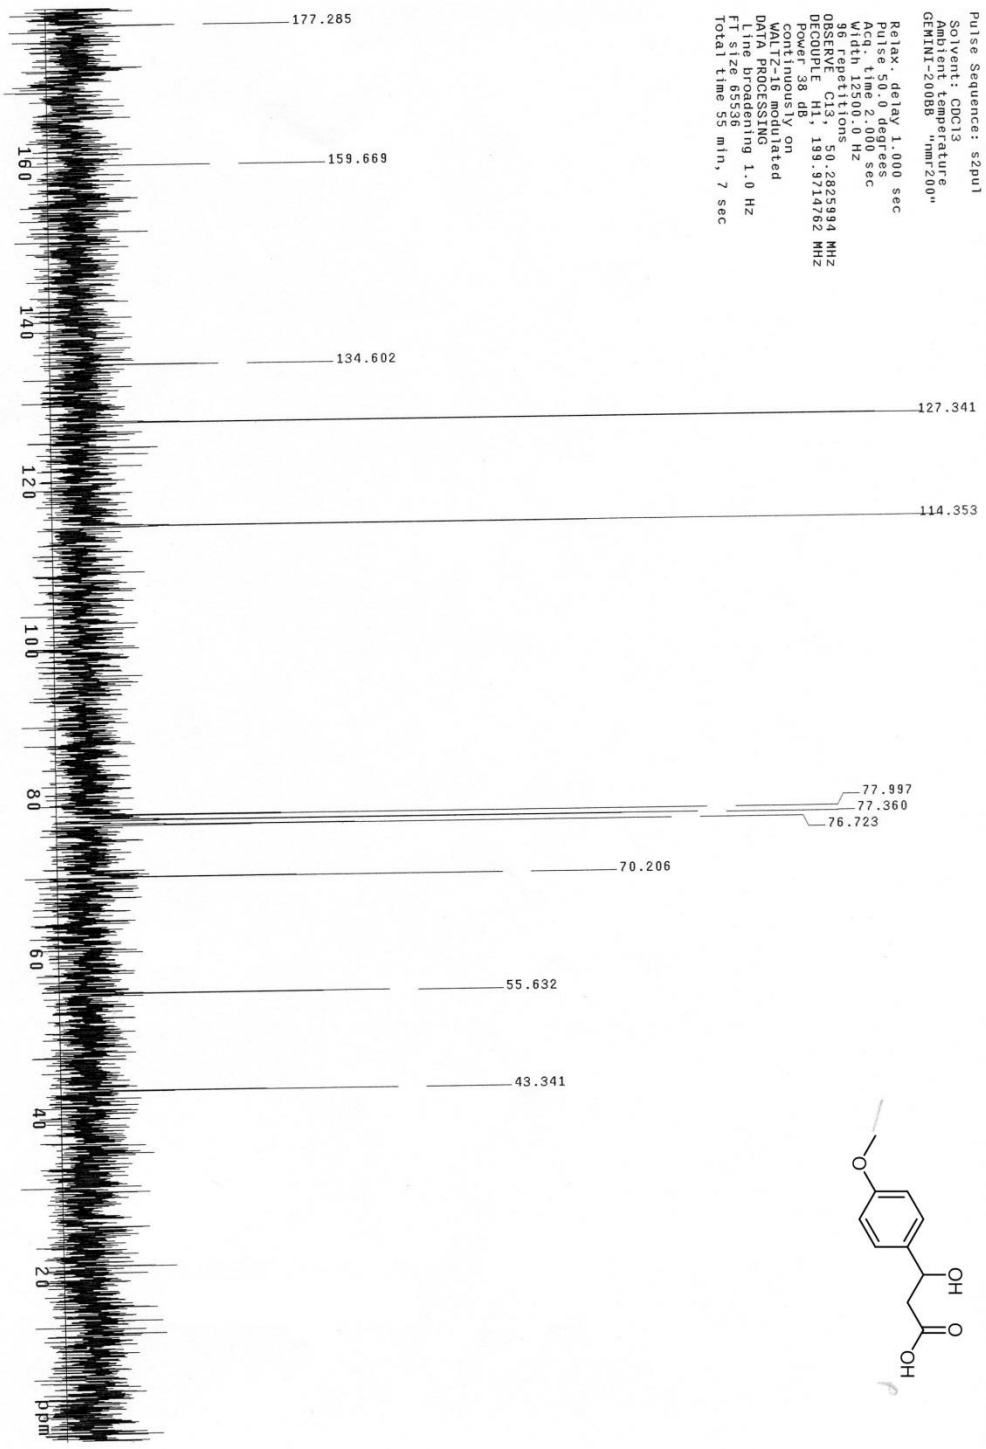



Pulse Sequence: szpu1  
 Solvent: CDCl3  
 Ambient temperature  
 GEMINI-20088 "nmr200"  
 Relax: delay 0.100 sec  
 Pulse 49.1 degrees  
 Acq. time 4.000 sec  
 4 scans  
 4100 Hz  
 OBSERVE H1 199.9704752 MHz  
 DATA PROCESSING  
 FT size 65536  
 Total time 0 min, 18 sec

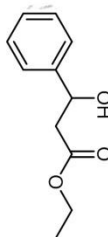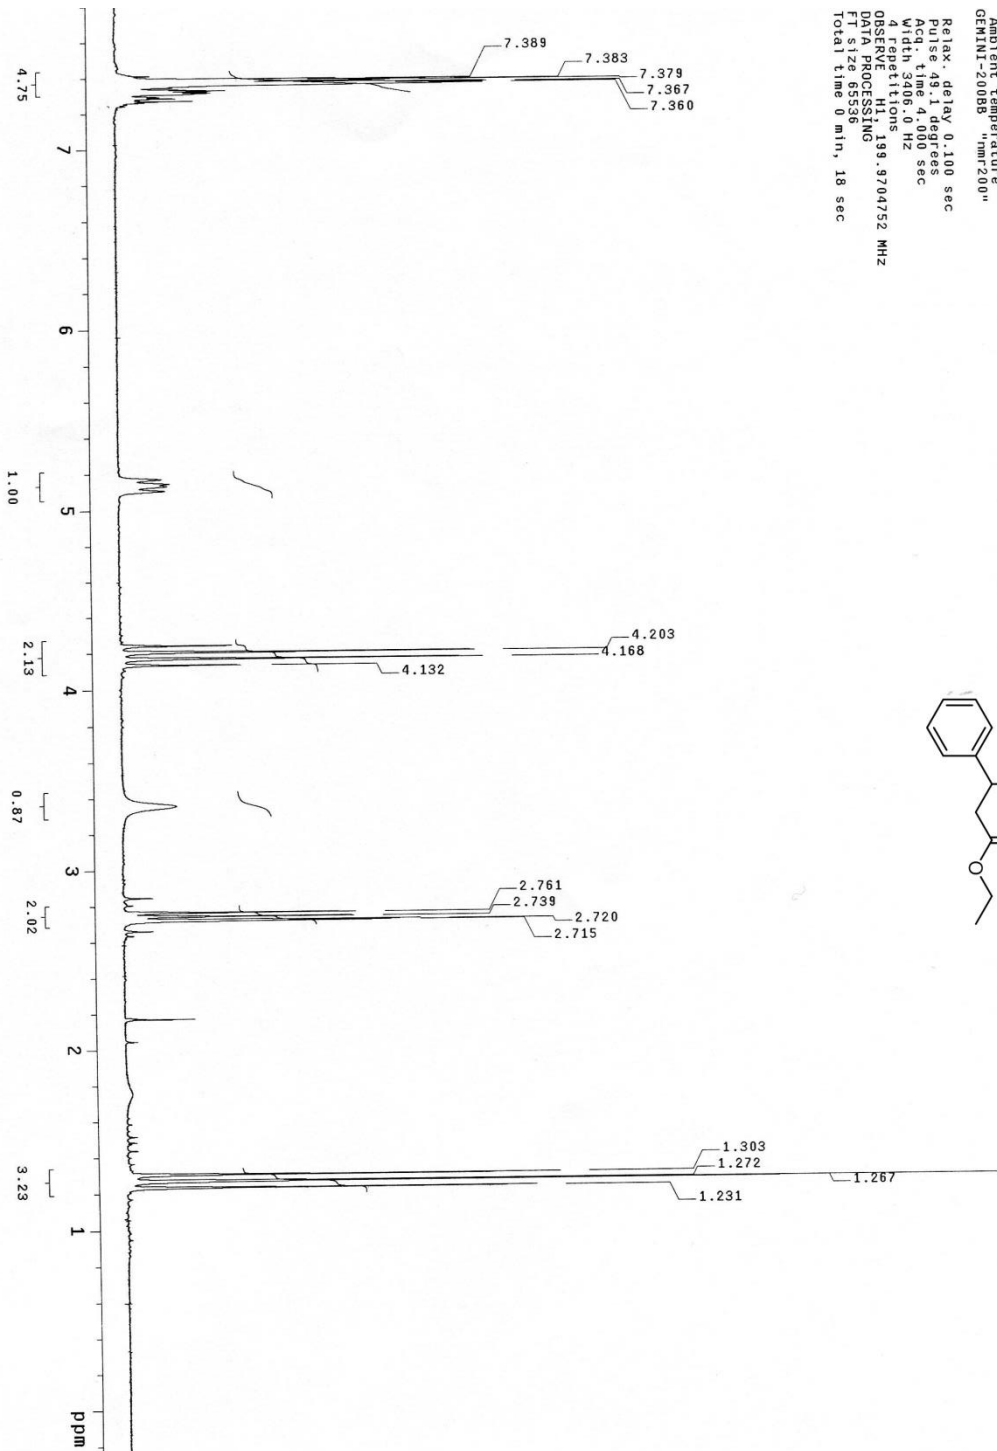



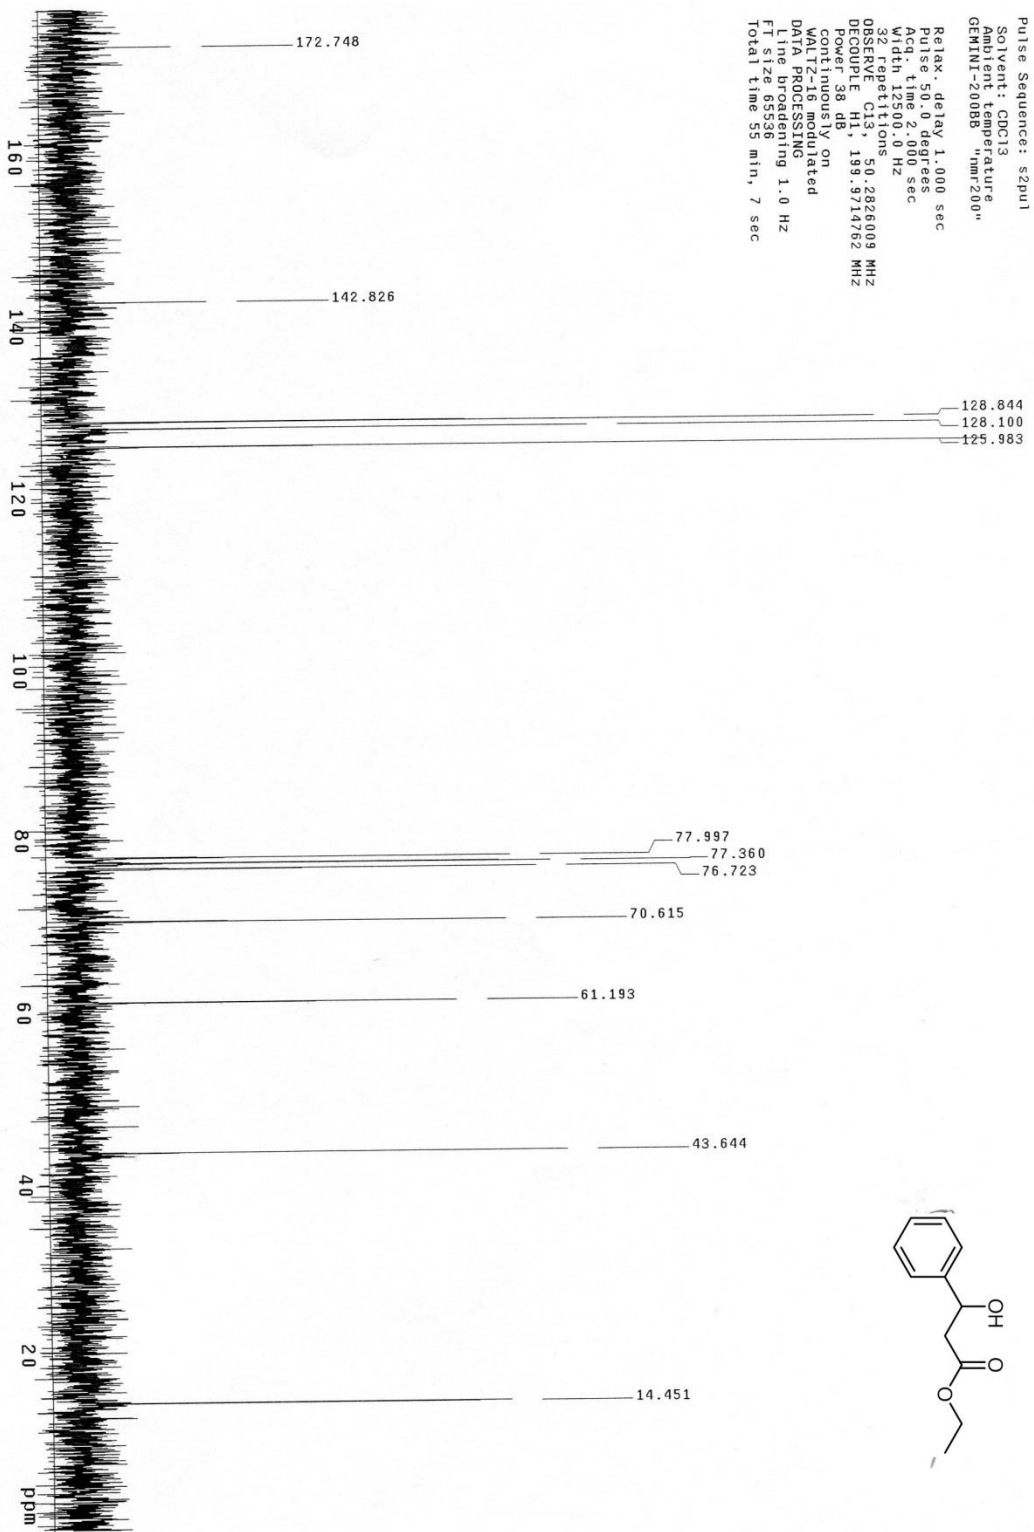

Pulse Sequence: s2pu1  
 Solvent: CDCl3  
 Ambient temperature  
 GEMINI-200BB "nmr200"  
 Relax. delay 1.000 sec  
 Pulse 50.0 degrees  
 Acq. time 2.000 sec  
 Width 12500.0 Hz  
 32 repetitions  
 OBSERVE C13, 50.2826009 MHz  
 DECOUPLE H1, 199.9714762 MHz  
 Power 38 dB  
 CONTINUOUSLY ON  
 NOT INDEPENDENTLY TUNABLE  
 DATA PROCESSING  
 Line broadening 1.0 Hz  
 FT size 65536  
 Total time 59 min, 7 sec





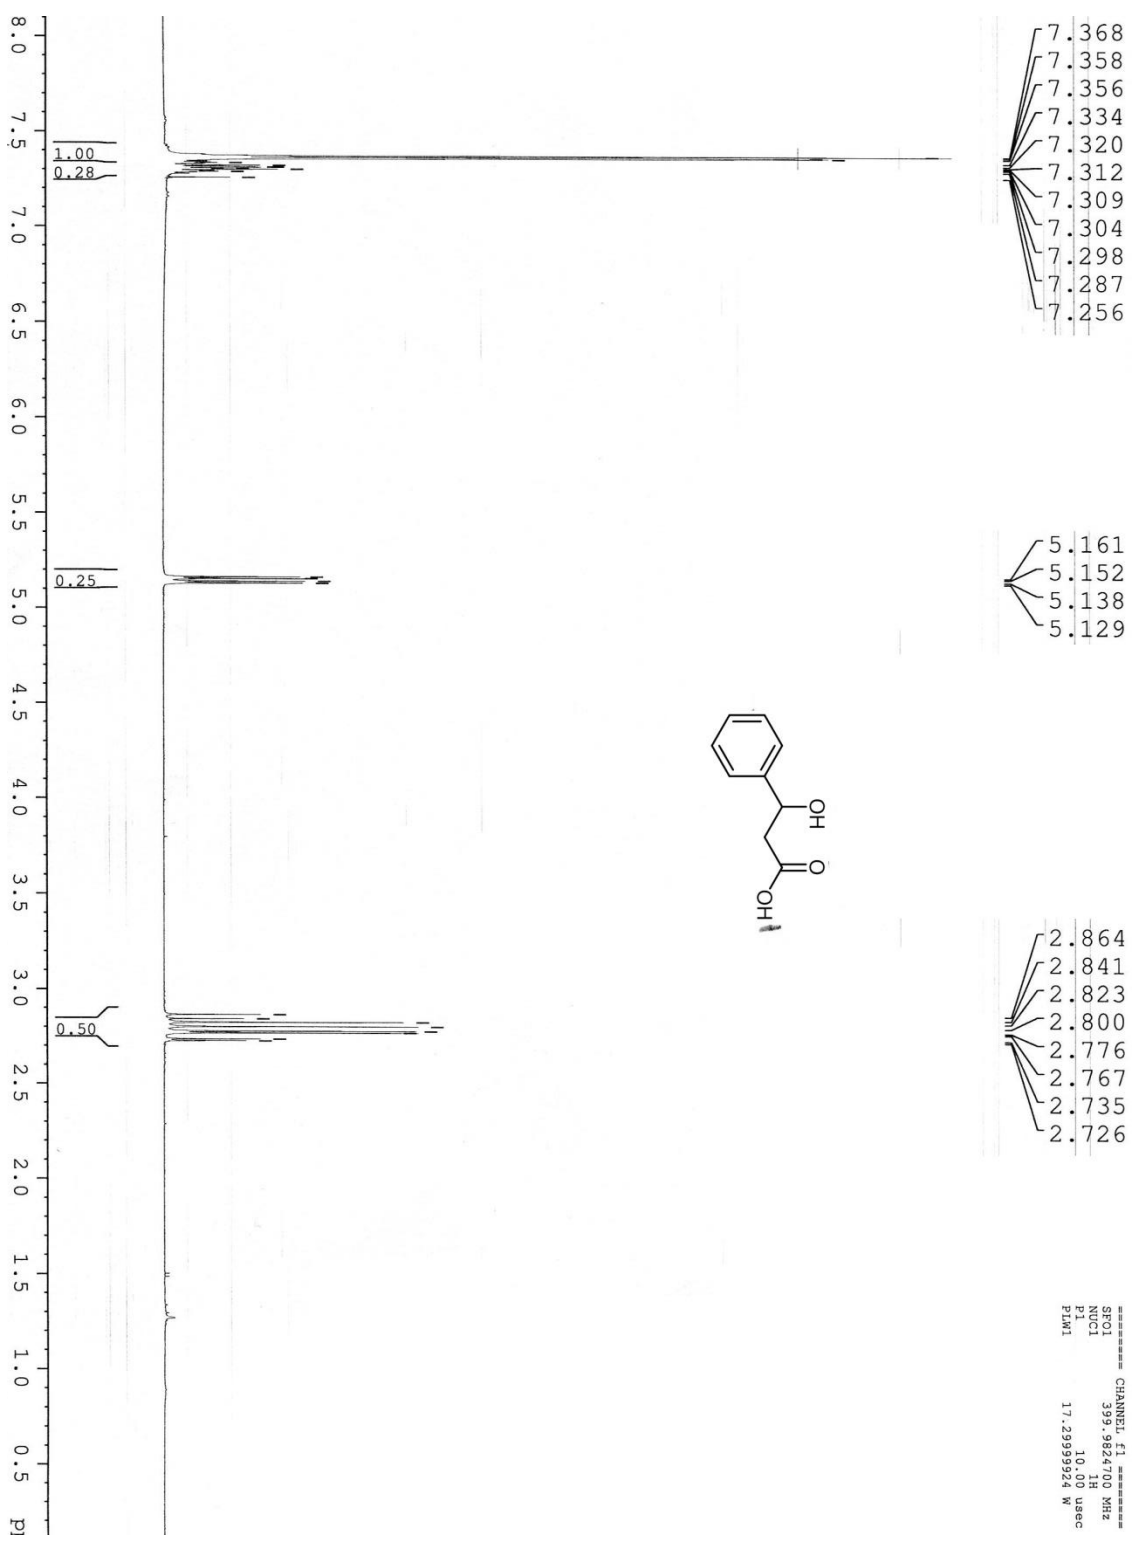

\*\*\*\*\* CHANNEL F1 \*\*\*\*\*  
 SFO1 399.9824700 MHz  
 NUC1 1H  
 P1 10.00 usec  
 PLW1 17.2999924 W



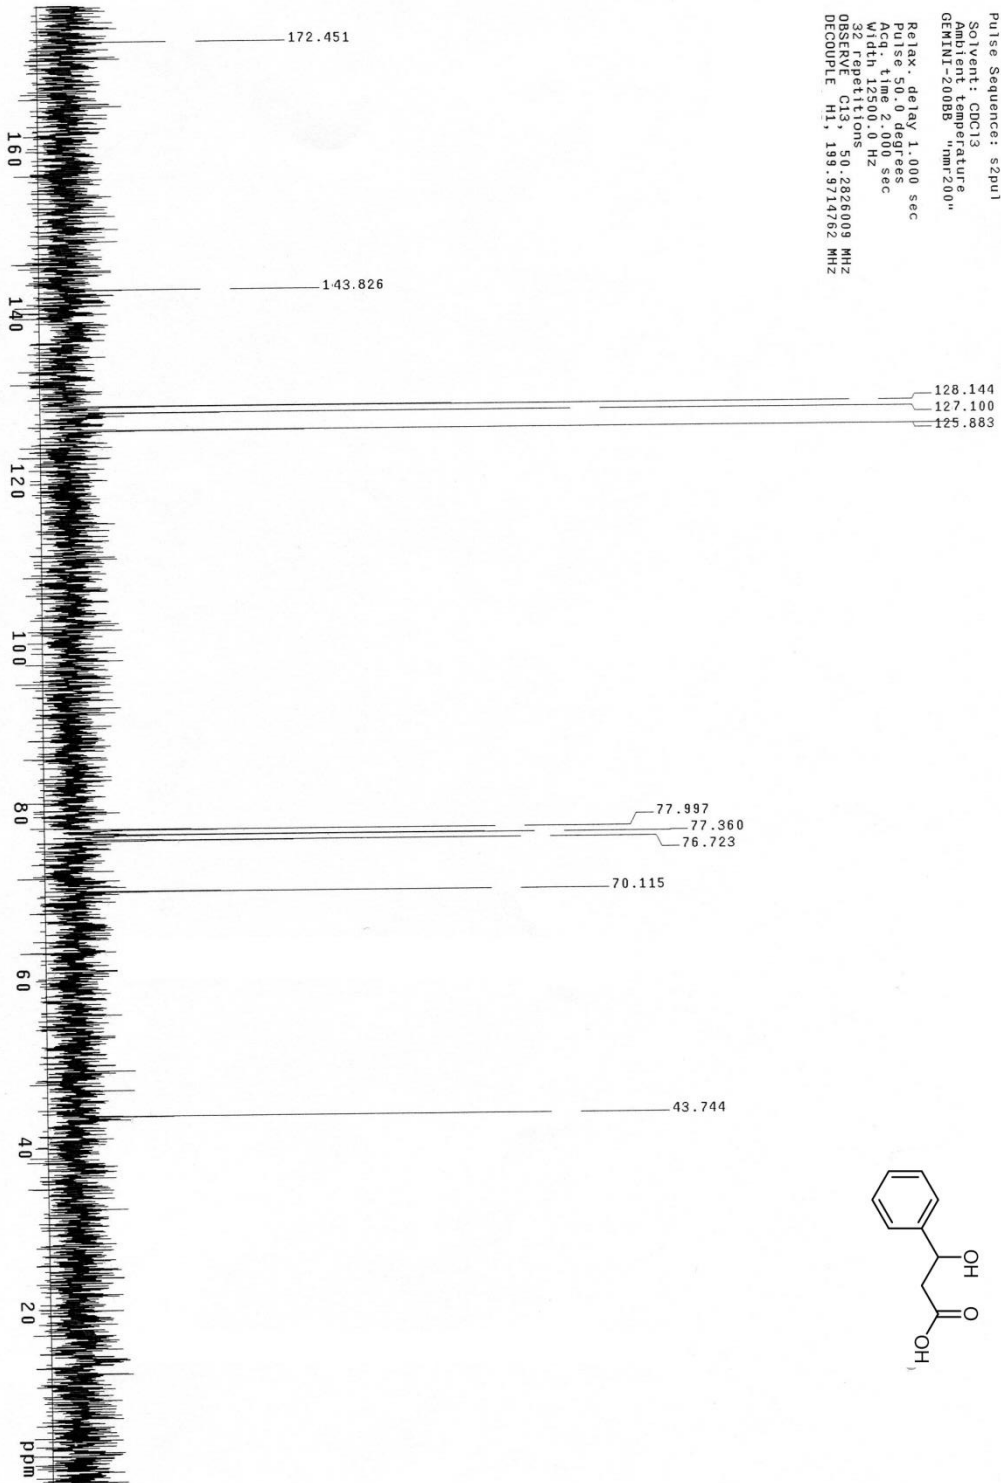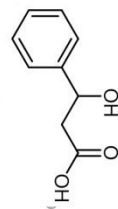



7.5  
7.0  
6.5  
6.0  
5.5  
5.0  
4.5  
4.0  
3.5  
3.0  
2.5  
2.0  
1.5  
1.0  
0.5  
ppm

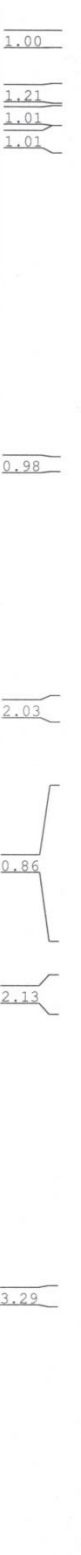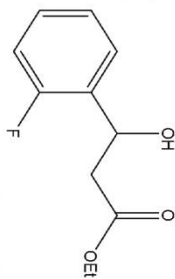

- 7.108
- 7.092
- 7.089
- 7.073
- 7.070
- 6.975
- 6.972
- 6.955
- 6.952
- 6.949
- 6.946
- 6.928
- 6.925

- 5.356
- 5.348
- 5.334
- 5.325

- 4.144
- 4.126
- 4.108
- 4.091

- 3.392

- 2.756
- 2.747
- 2.715
- 2.706
- 2.676
- 2.654
- 2.635
- 2.612

- 1.210
- 1.192
- 1.174

170 160 150 140 130 120 110 100 90 80 70 60 50 40 30 20 ppm

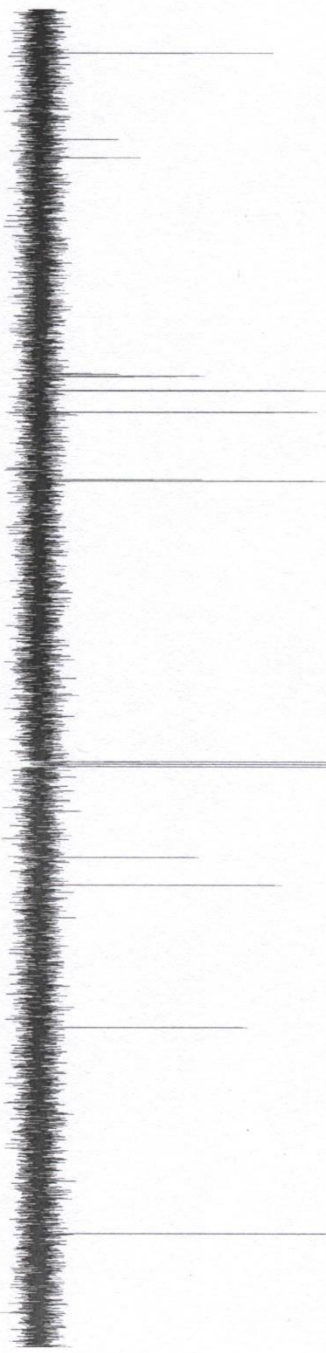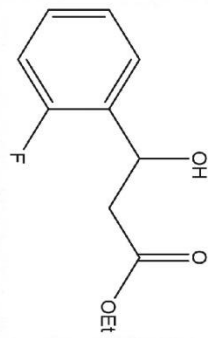

- 172.39
- 160.69
- 158.25
- 129.39
- 129.16
- 129.07
- 127.24
- 127.20
- 124.36
- 124.32
- 115.33
- 115.12
- 64.62
- 64.59
- 60.92
- 41.87
- 41.86
- 14.10

Pulse Sequence: s2pu1  
Solvent: CDCl3  
Ambient temperature  
CEMINT-20088 "nm/200"  
Relax. delay 0.100 sec  
Pulse 49.1 degrees  
Acq. time 4.092 sec  
4 repetitions  
OBSERVE H1, 199.9704780 MHz  
DATA PROCESSING  
FT size 65536  
Total time 0 min, 18 sec

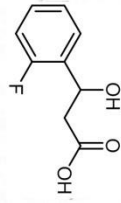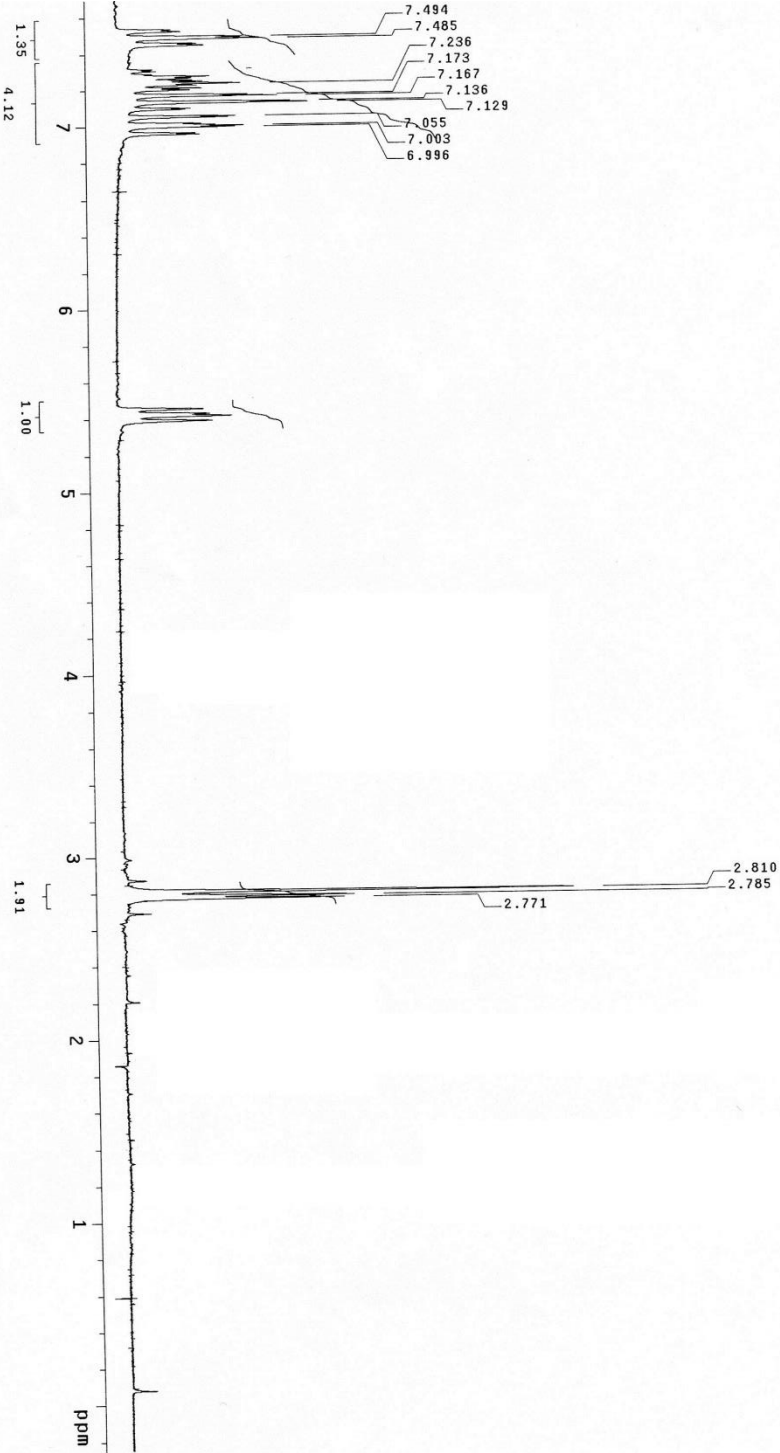





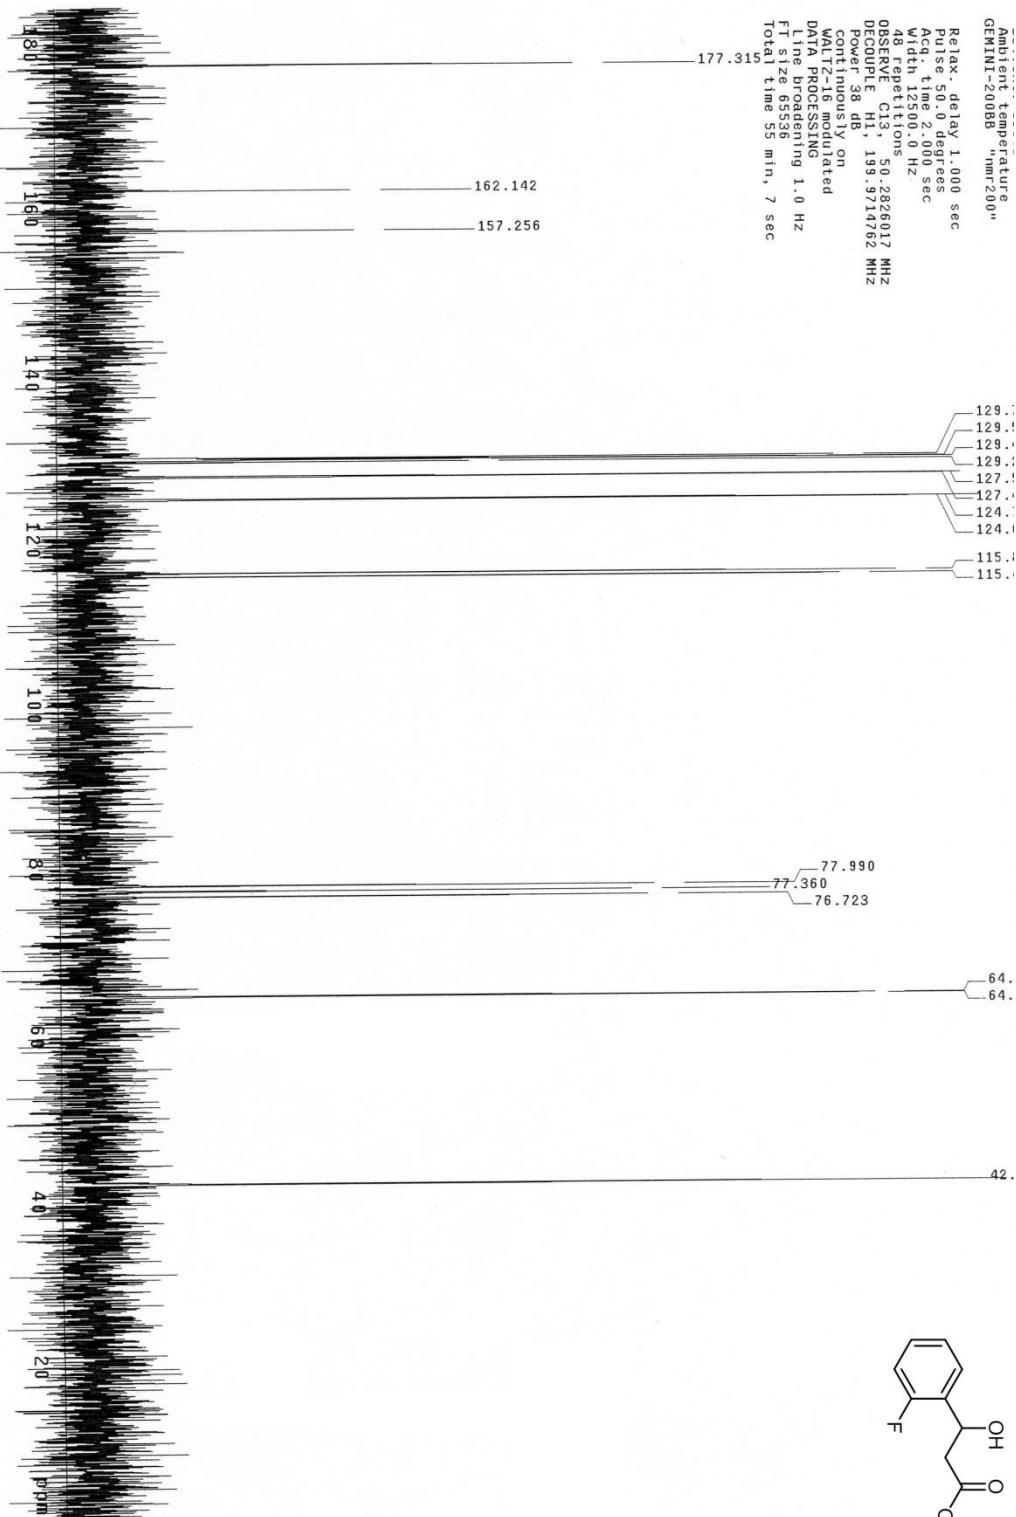

Ambient temperature  
GEMINI-200BB "nmr200"  
Relax. delay 1.000 sec  
Pulse 50.0 degrees  
Acq. time 2.000 sec  
Mtdh 12300.0 Hz  
M Freq 125000.0 Hz  
ORSERVE C13 50.2826017 MHZ  
DECUPLE H1 199.9714762 MHZ  
Power 38 db  
continously on  
WALTZ-16 modulated  
DATA PROCESSING  
Line broadening 1.0 Hz  
FT size 65536  
Total time 55 min, 7 sec

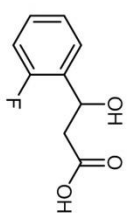



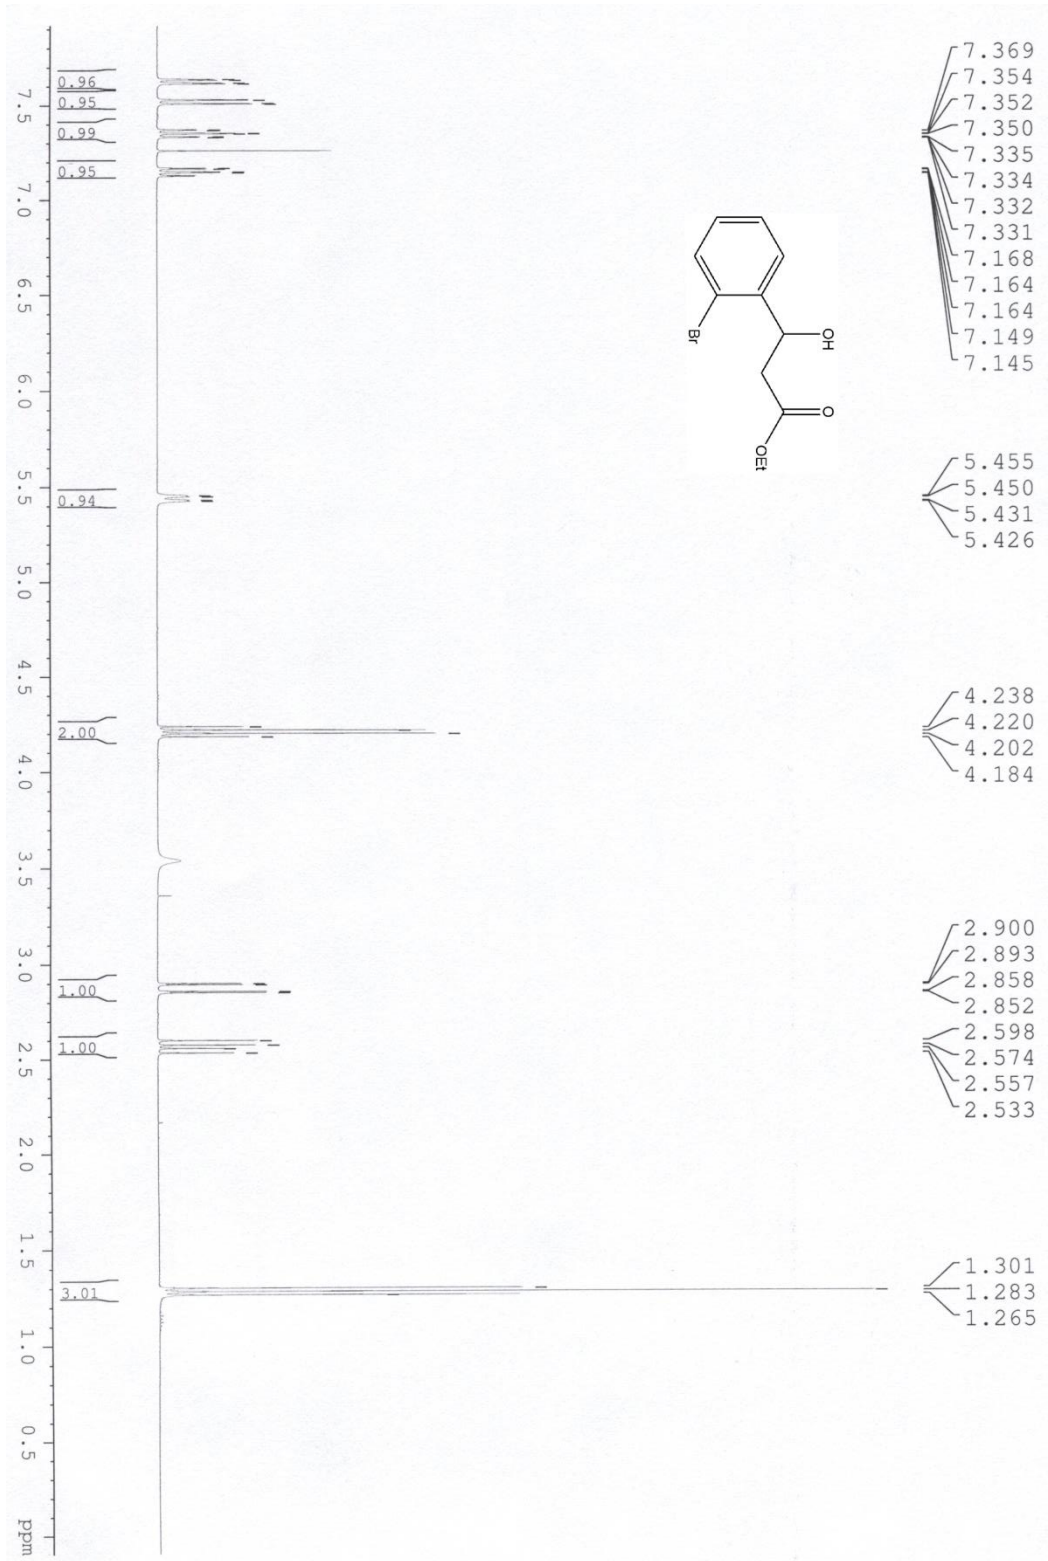

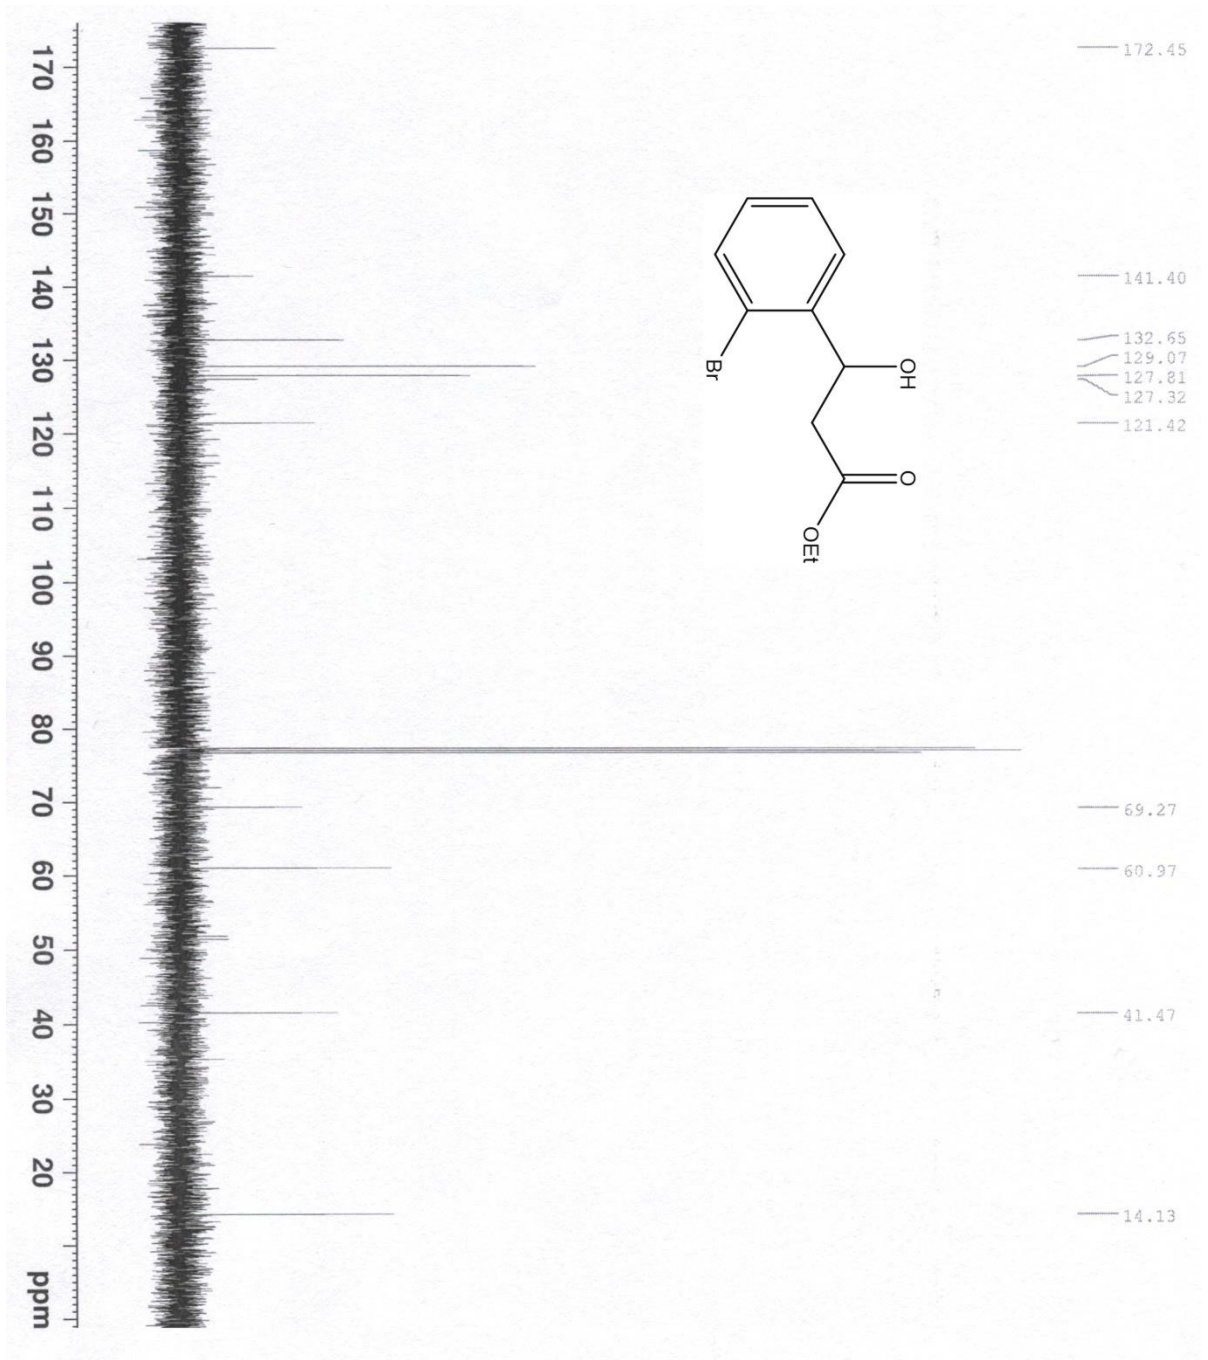

Pulse Sequence: s2pul  
 Solvent: CDCl3  
 Acquisition Temperature: 200.00  
 GEMINAL: 20088  
 Relax. delay 0.100 sec  
 Pulse: 49.1 degrees  
 Acq. time 4.000 sec  
 Width 3406.0 Hz  
 4 repetitions 199.9704770 MHz  
 DSSK PROCESSING  
 FT size 65536  
 Total time 0 min, 18 sec

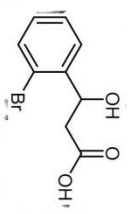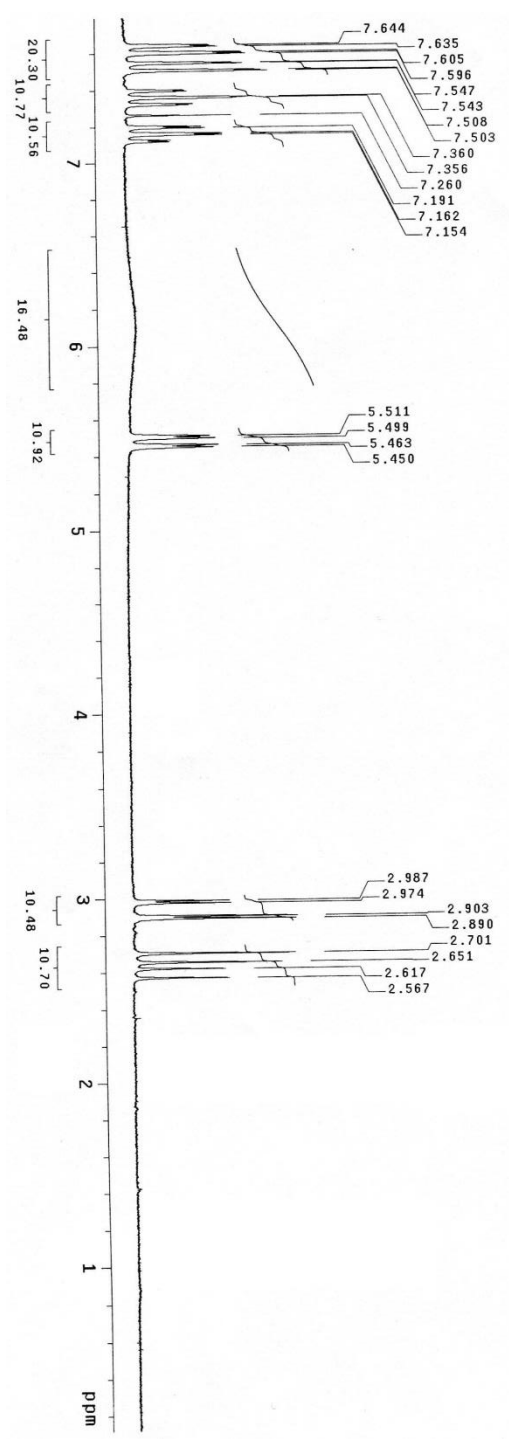



Pulse Sequence: szpul  
Solvent: CDCl3  
Ambient Temperature  
GEMINI-20088 "mm200"  
Relax. delay 1.000 sec  
Pulse program: zgpg30  
Acq time 2.000 sec  
Width 12500.0 Hz  
80 repetitions  
OBSERVE C13, 50.2826001 MHz  
DECUPLE H1, 199.9714782 MHz  
Power 38.00 dB  
WALTZ-16 modulated  
DATA PROCESSING  
Line broadening 1.0 Hz  
FT size 65536  
Total time 55 min, 7 sec

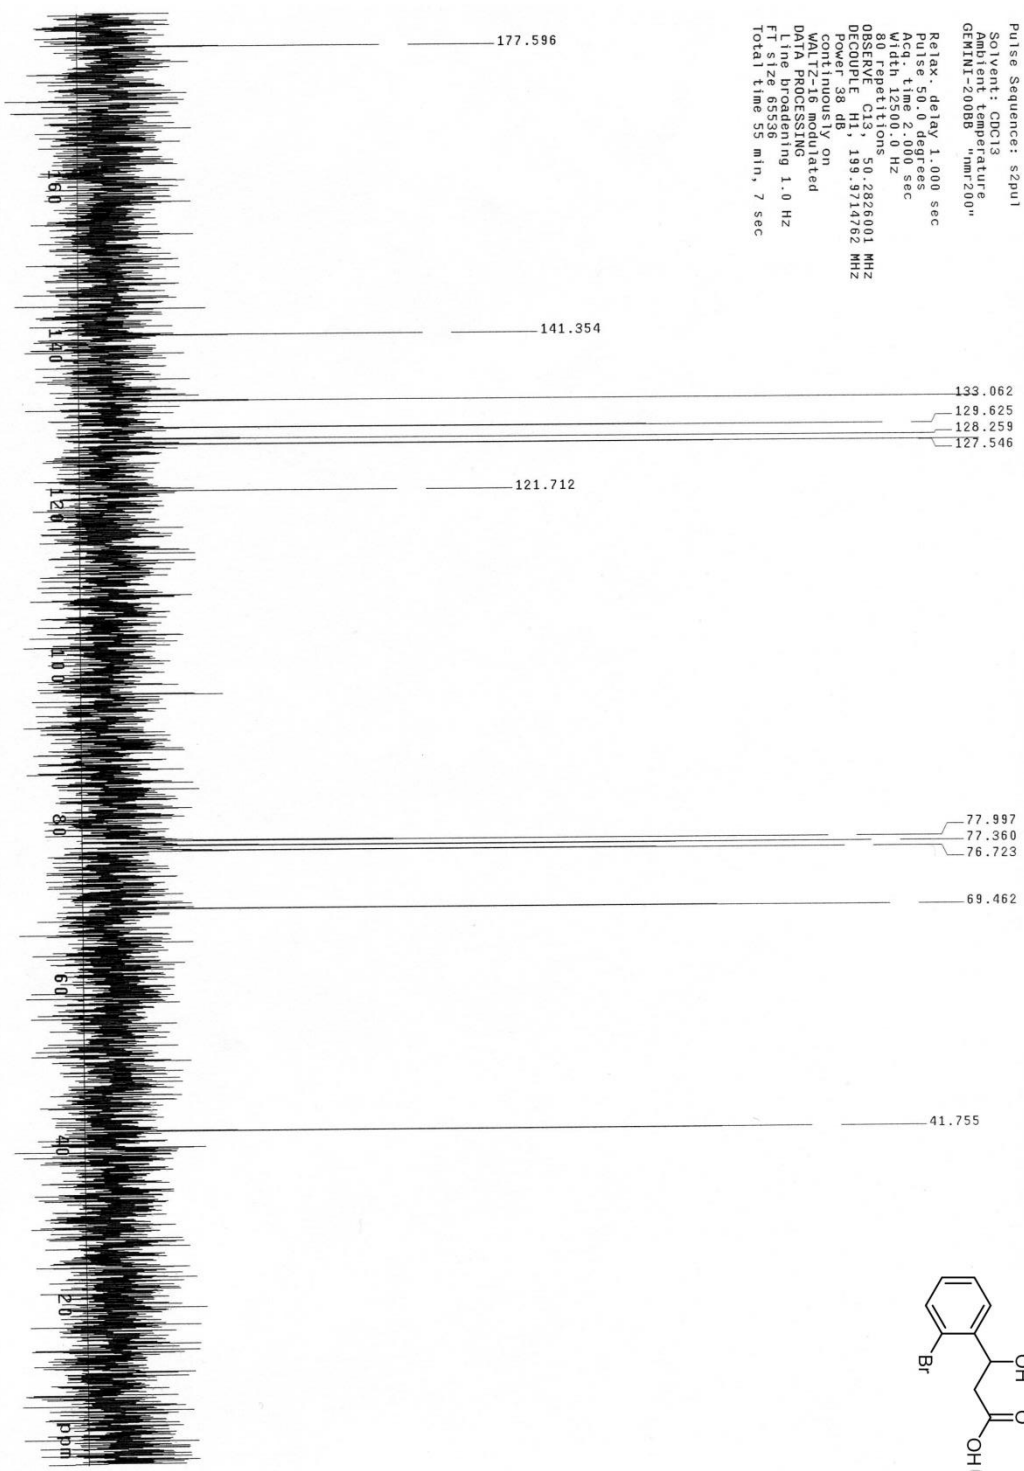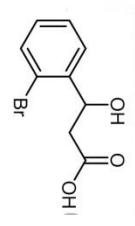





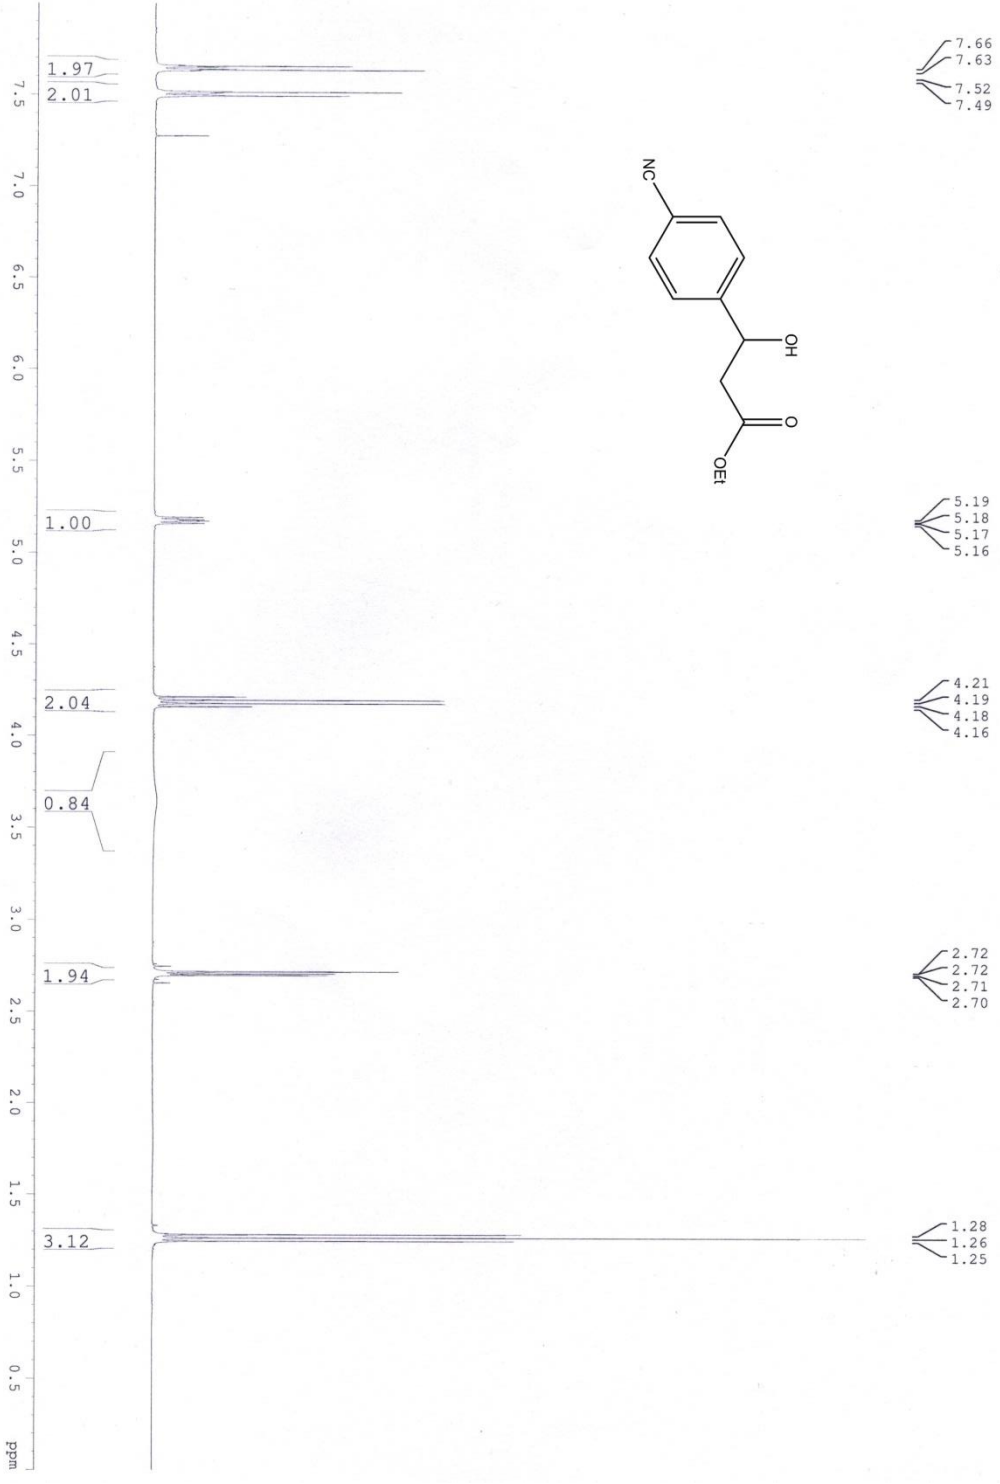

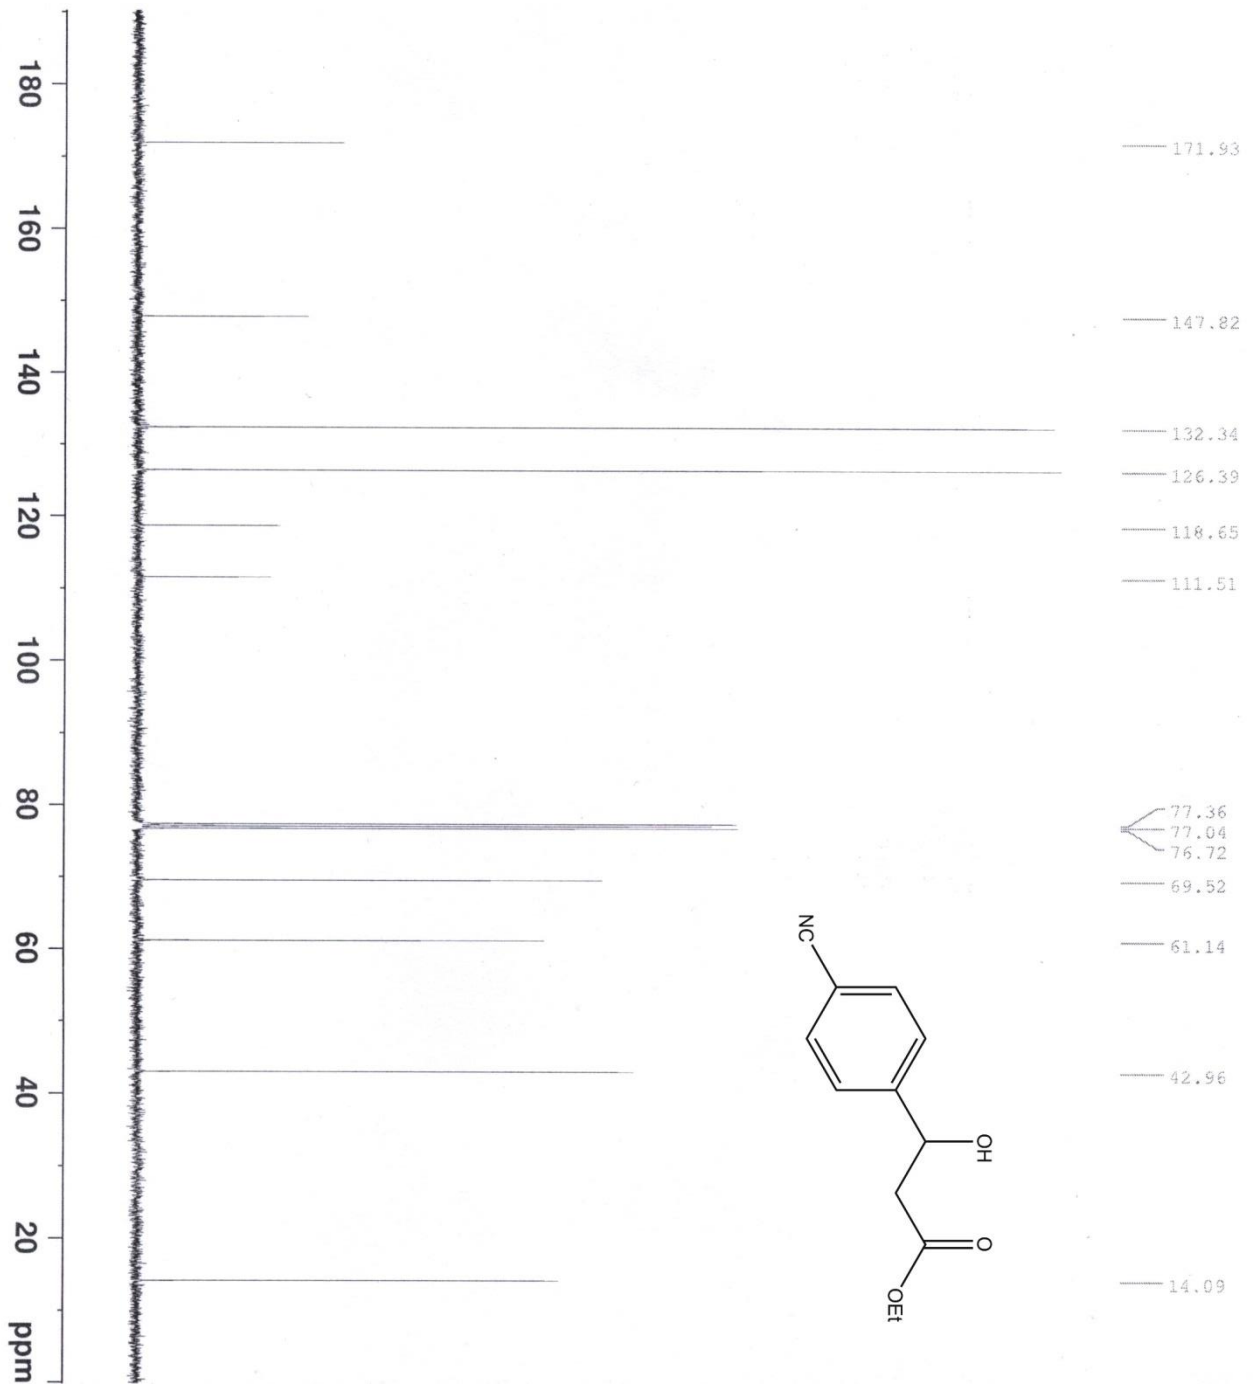

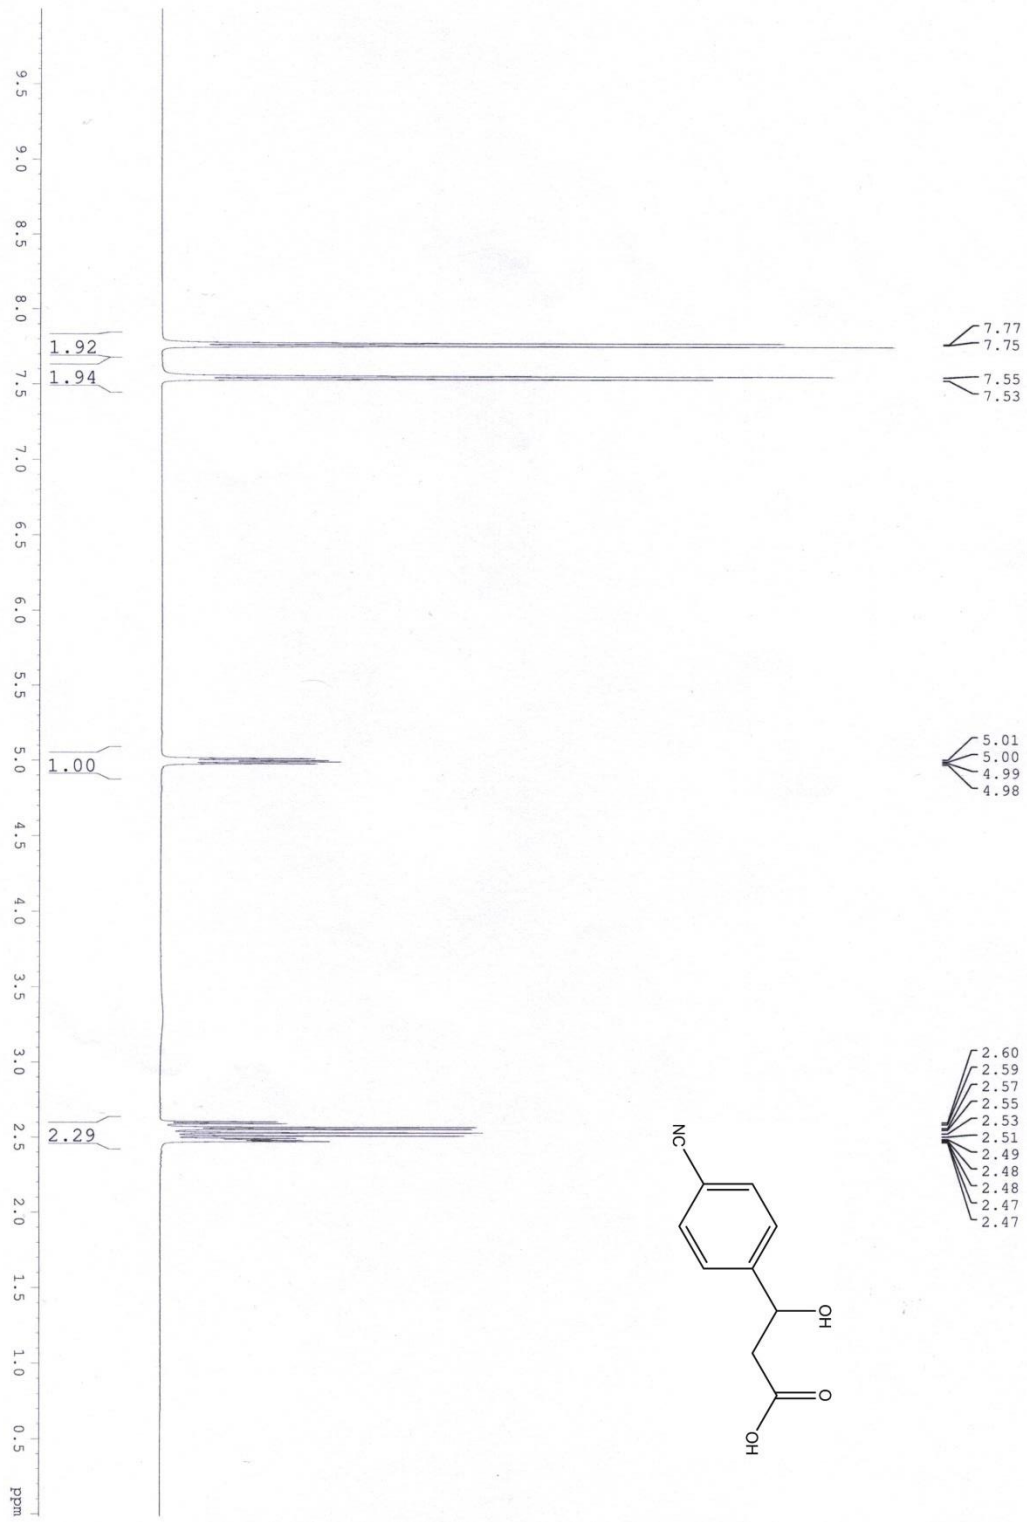

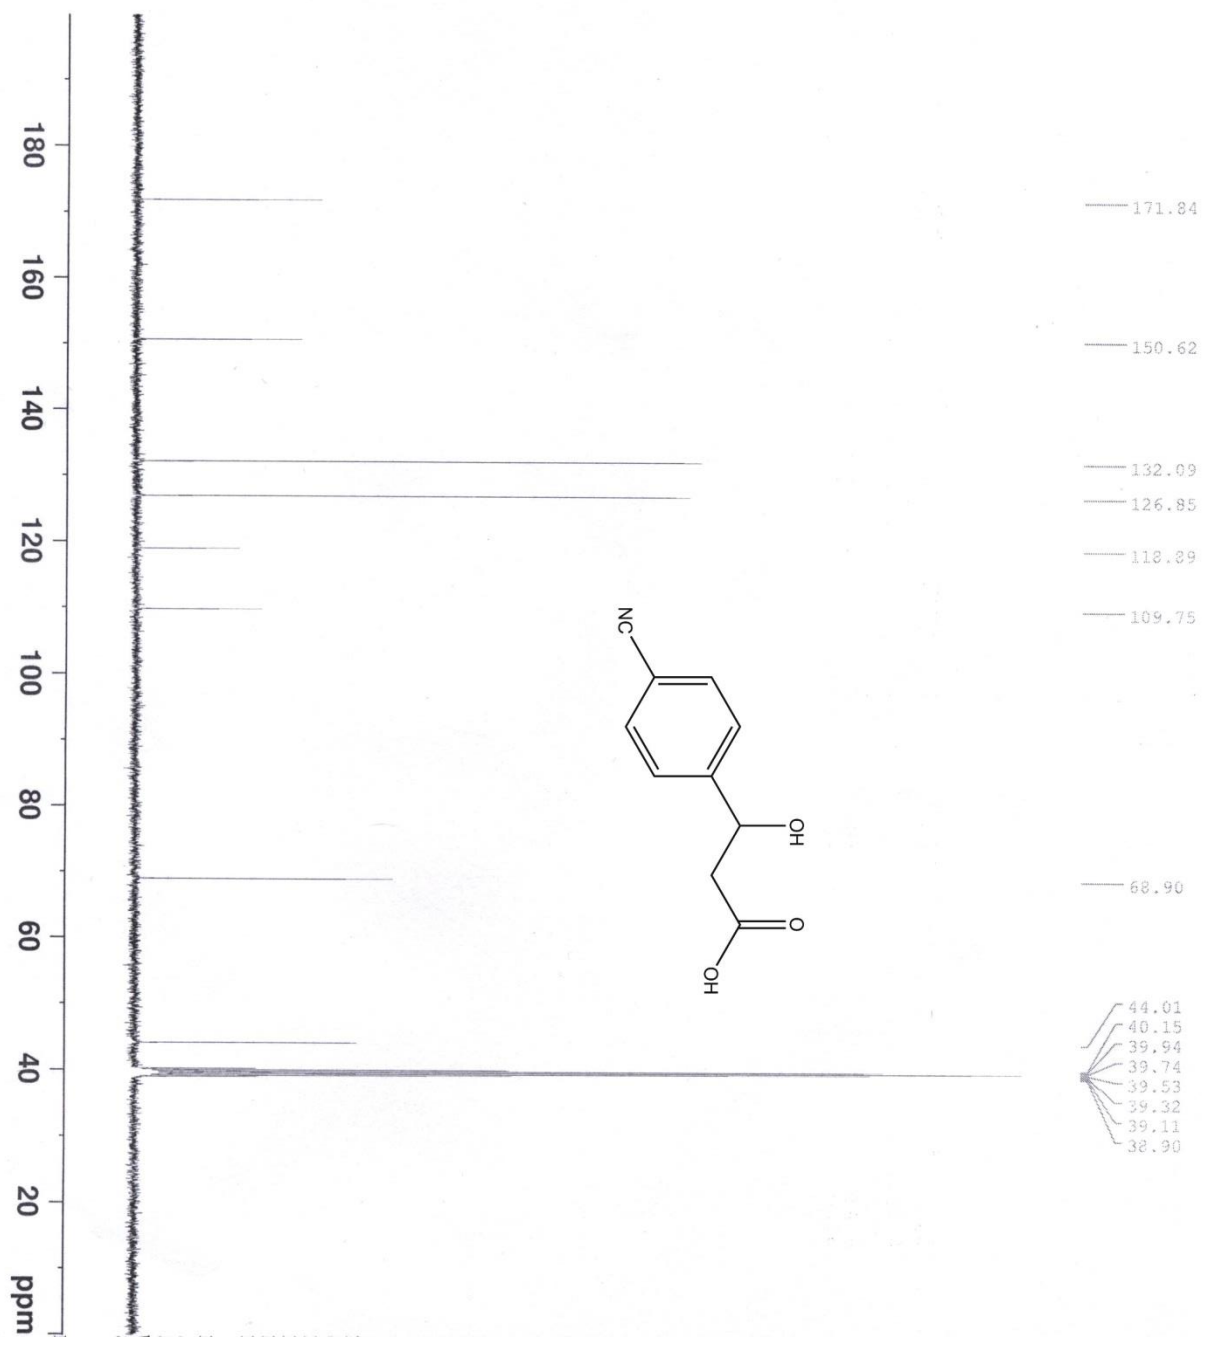

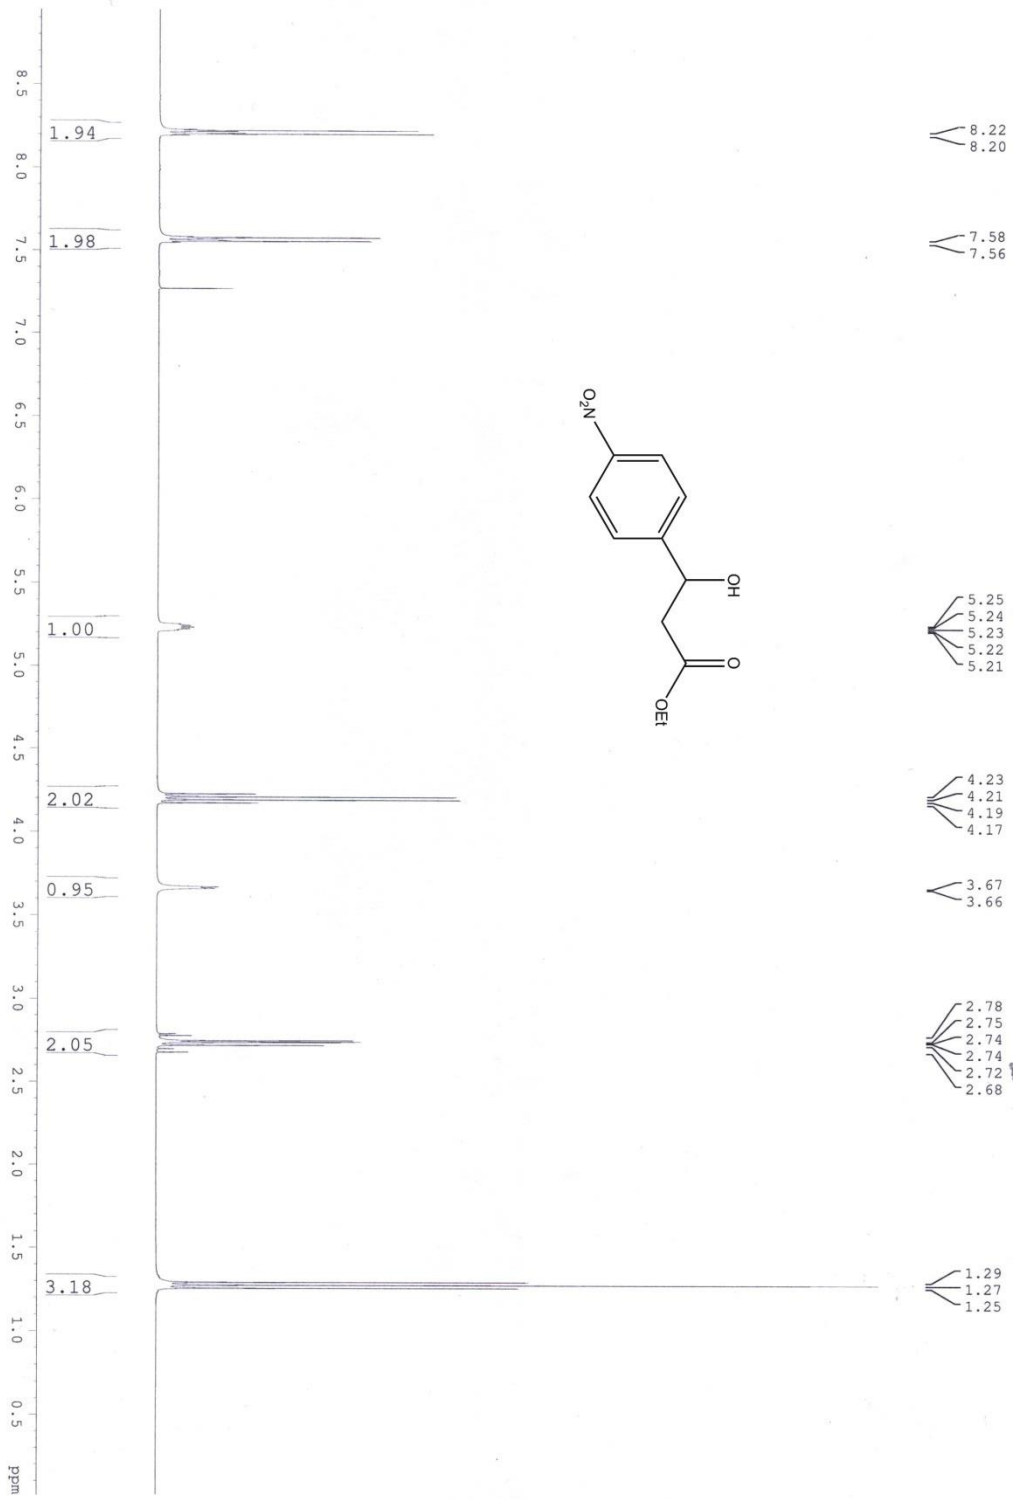

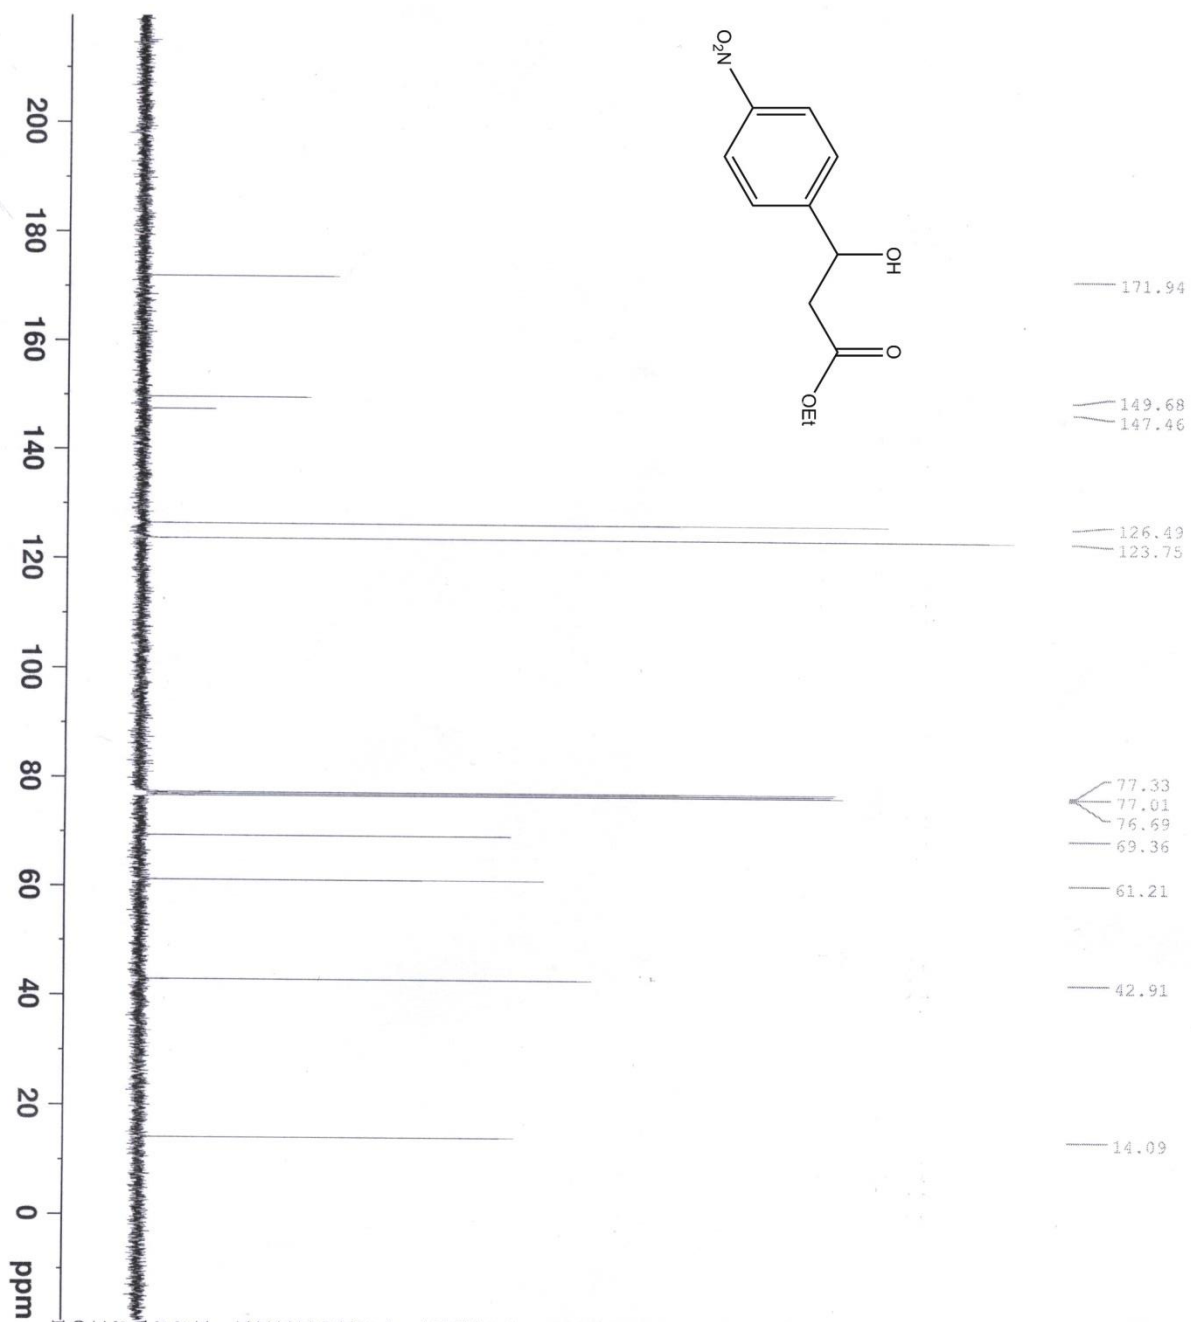

13  
12  
11  
10  
9  
8  
7  
6  
5  
4  
3  
2  
1  
ppm

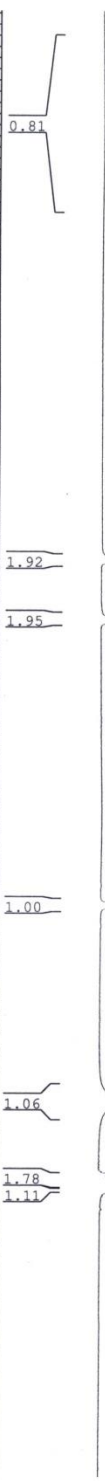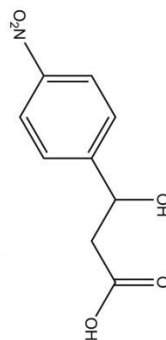

8.179  
8.157  
7.637  
7.615

5.070  
5.057  
5.049  
5.036

3.289  
2.632  
2.619  
2.594  
2.581  
2.552  
2.531  
2.514  
2.493  
2.489  
2.484  
2.480  
2.475  
2.471

170 160 150 140 130 120 110 100 90 80 70 60 50 40 30 20 ppm

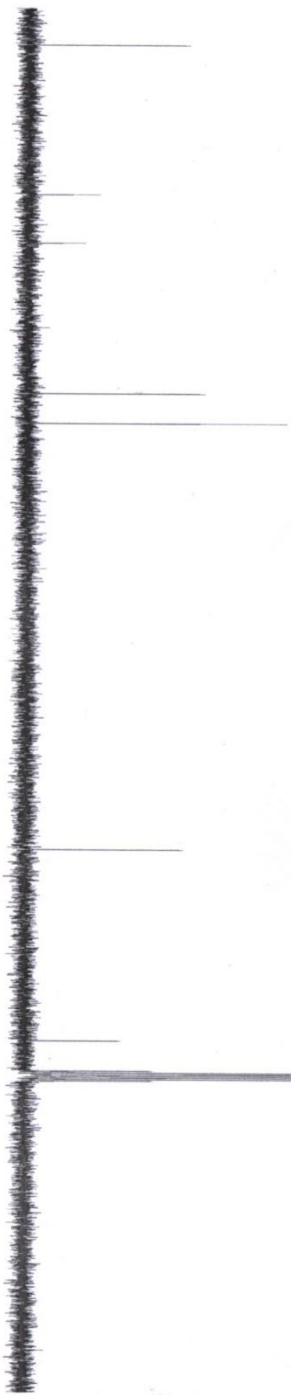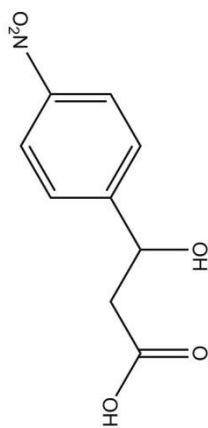

172.24

153.22

147.03

127.56

123.74

69.17

44.48



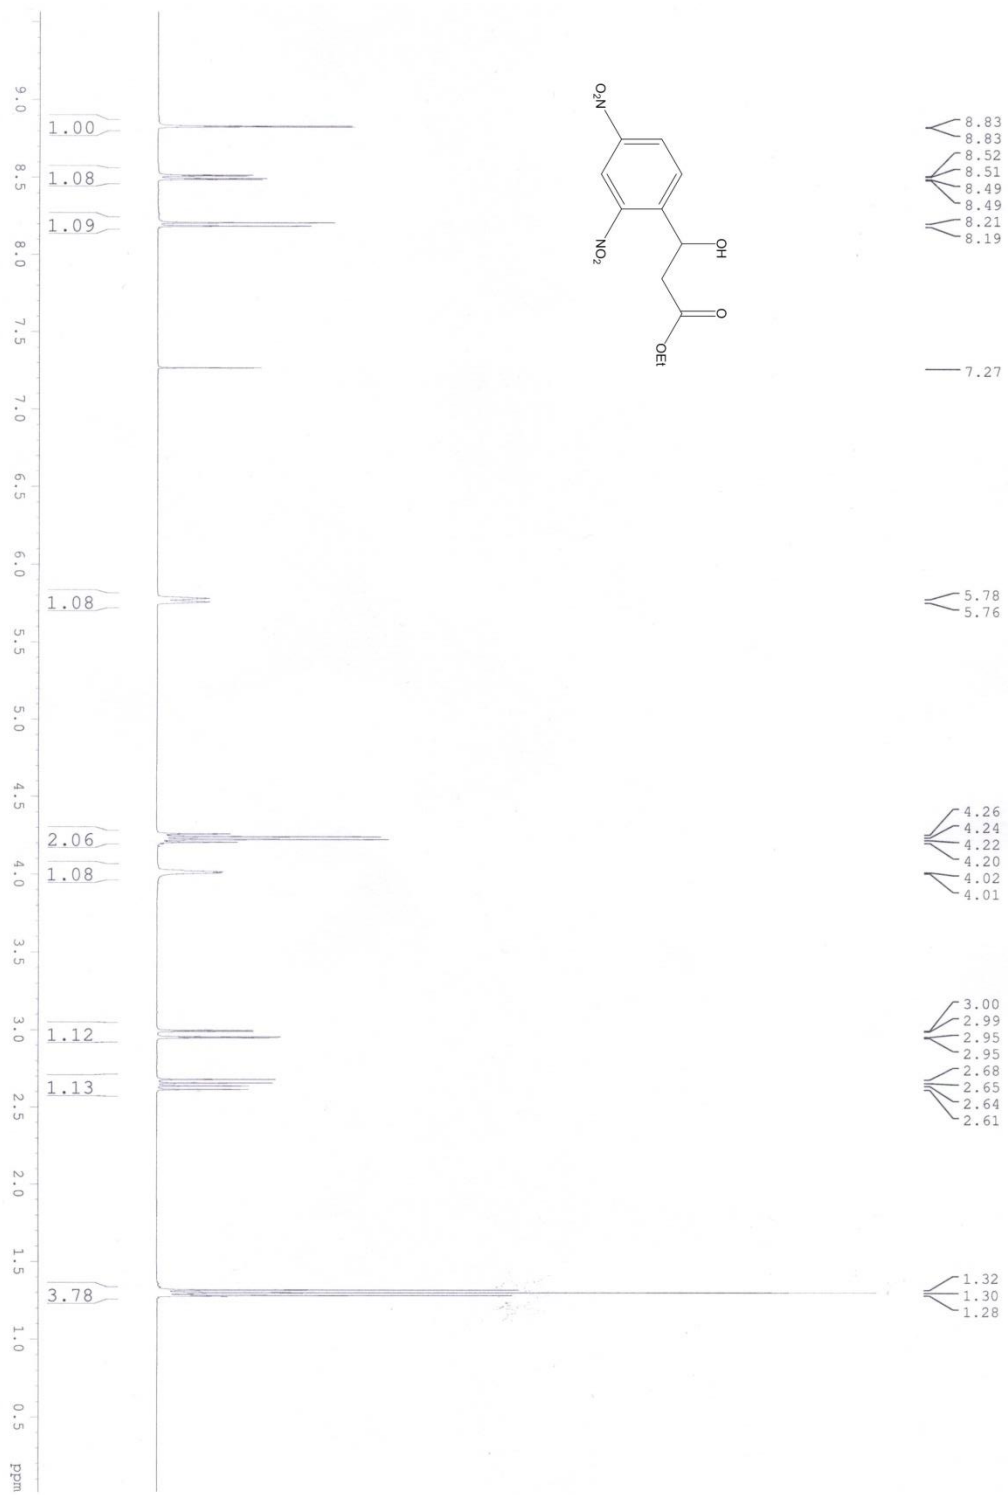

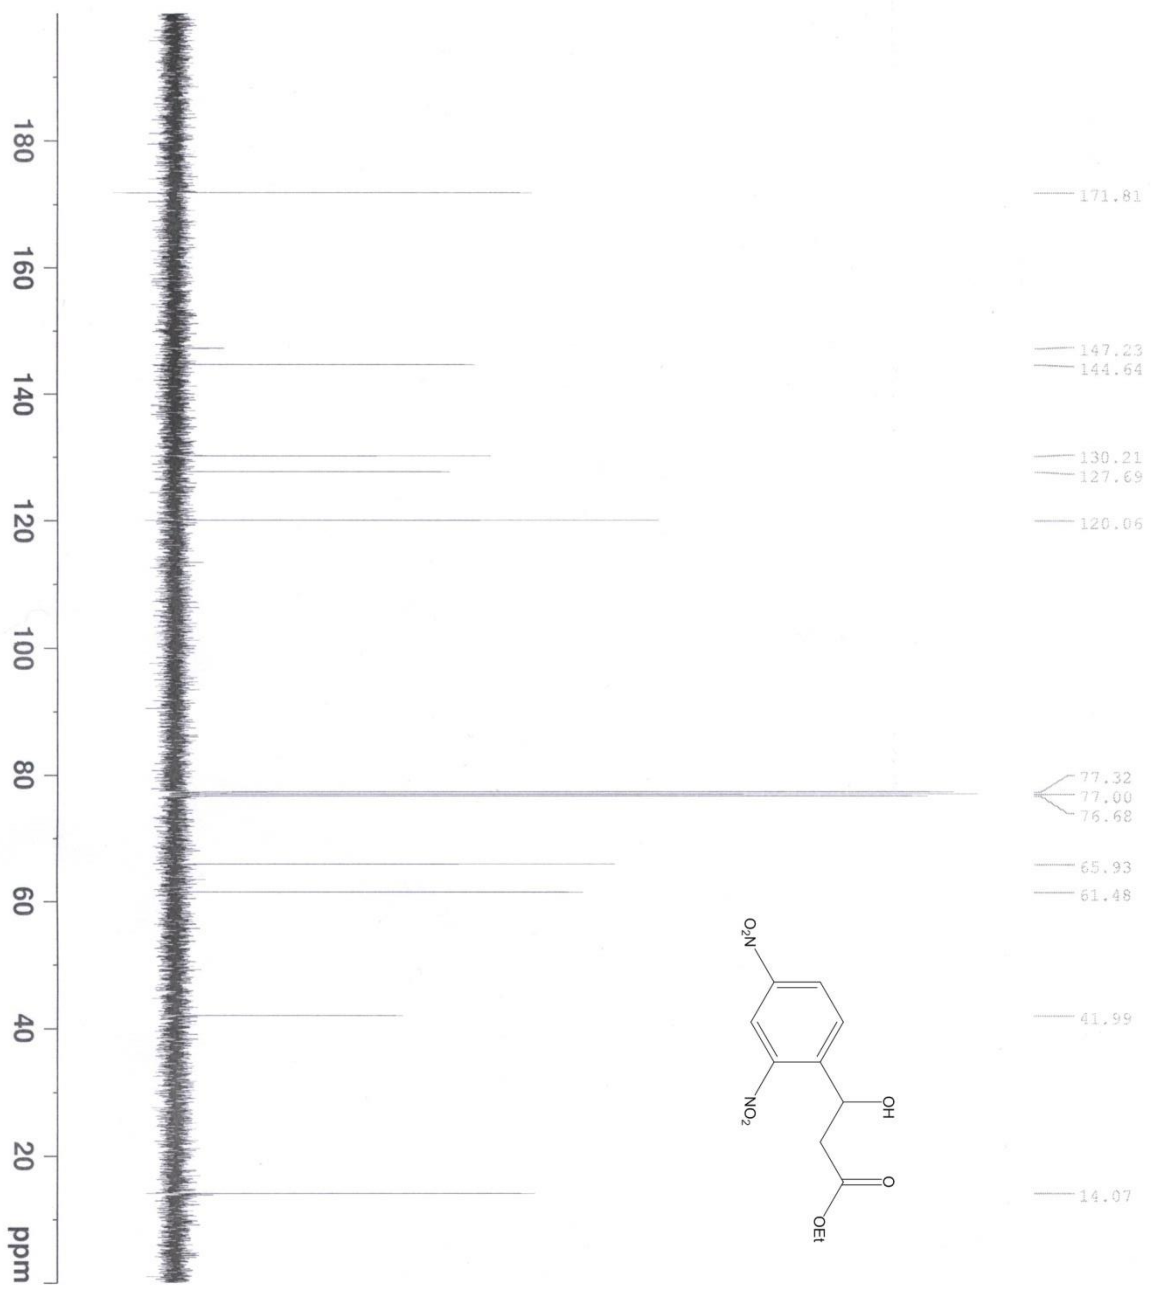

13  
12  
11  
10  
9  
8  
7  
6  
5  
4  
3  
2  
1  
ppm

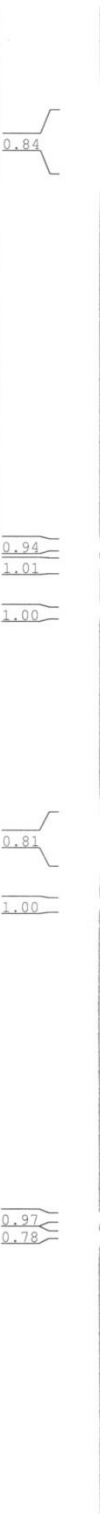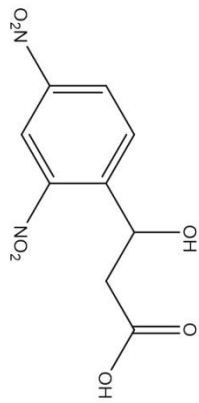

12.355

- 8.739
- 8.734
- 8.591
- 8.585
- 8.569
- 8.563
- 8.154
- 8.132

6.084

- 5.565
- 5.556
- 5.543
- 5.534

- 2.769
- 2.760
- 2.730
- 2.721
- 2.605
- 2.583
- 2.566
- 2.549
- 2.544
- 2.540
- 2.535
- 2.531

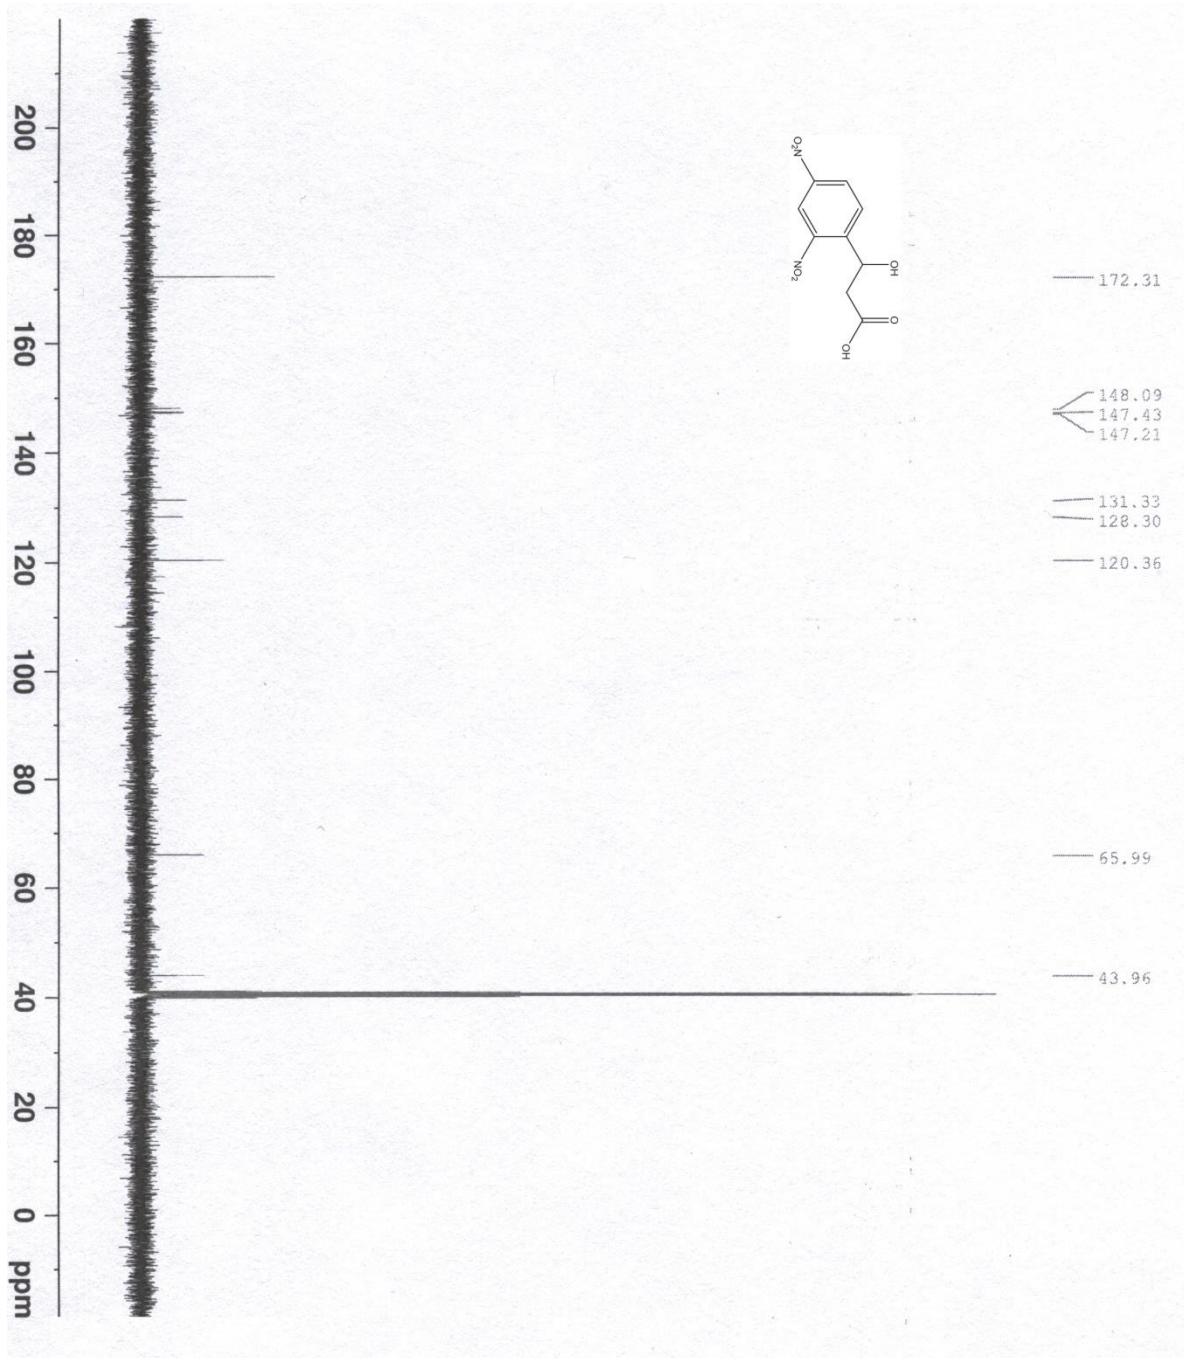

Pulse Sequence: s2pu1  
 Solvent: CDCl3  
 Ambient Temperature  
 GEMINI-200BB "nmr200"  
 Relax. delay 0.100 sec  
 Pulse. delay 0.100 sec  
 Acq. time 4.000 sec  
 Width 3406.0 Hz  
 4 repetitions  
 OBSERVE H1, 199.9704767 MHz  
 DATA PROCESSING  
 File size 358  
 Total time 0 min, 0 sec

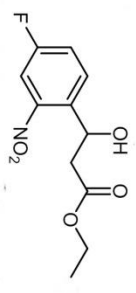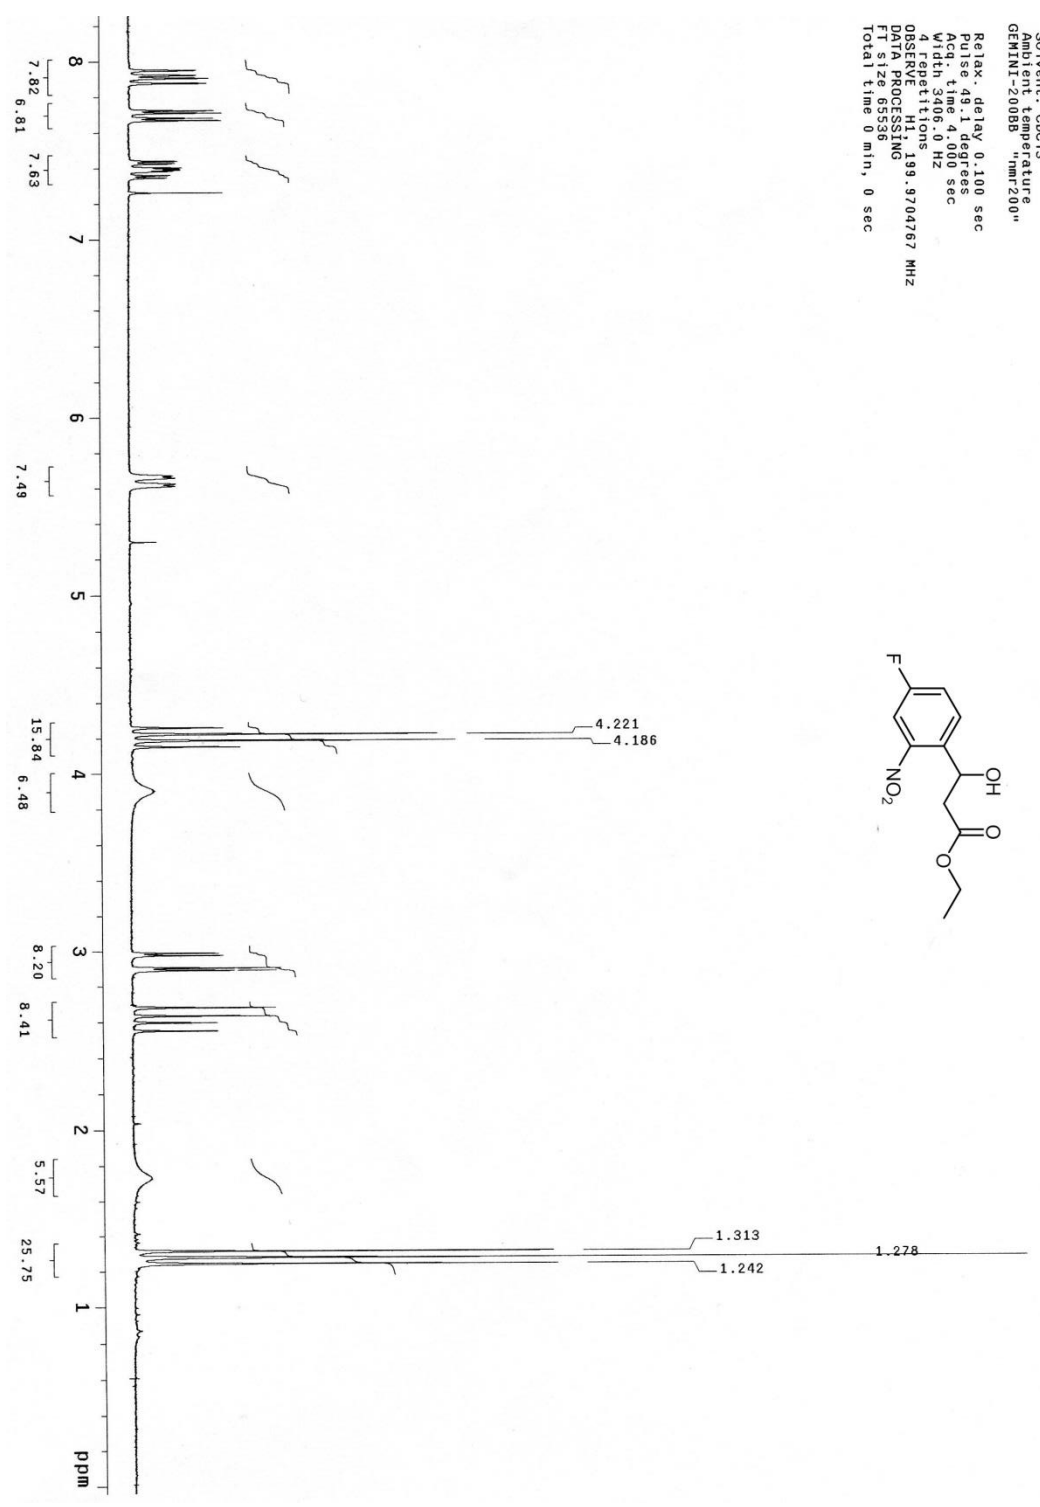



Pulse Sequence: s2pu1  
 Solvent: CDCl3  
 Ambient temperature  
 GEMINI-20088 "nmr200"  
 Relax delay 1.000 sec  
 Pulse program gprsg  
 Acq time 2.000 sec  
 Width 12500.0 Hz  
 80 repetitions  
 OBSERVE C13, 50.282598 MHz  
 DECOUPLE H1, 199.9714762 MHz  
 Power 38 dB  
 continuously on  
 WALTZ-16 modulated  
 DATA PROCESSING  
 Line broadening 1.0 Hz  
 Size 65536  
 Total time 55 min, 7 sec

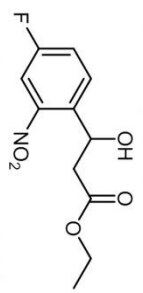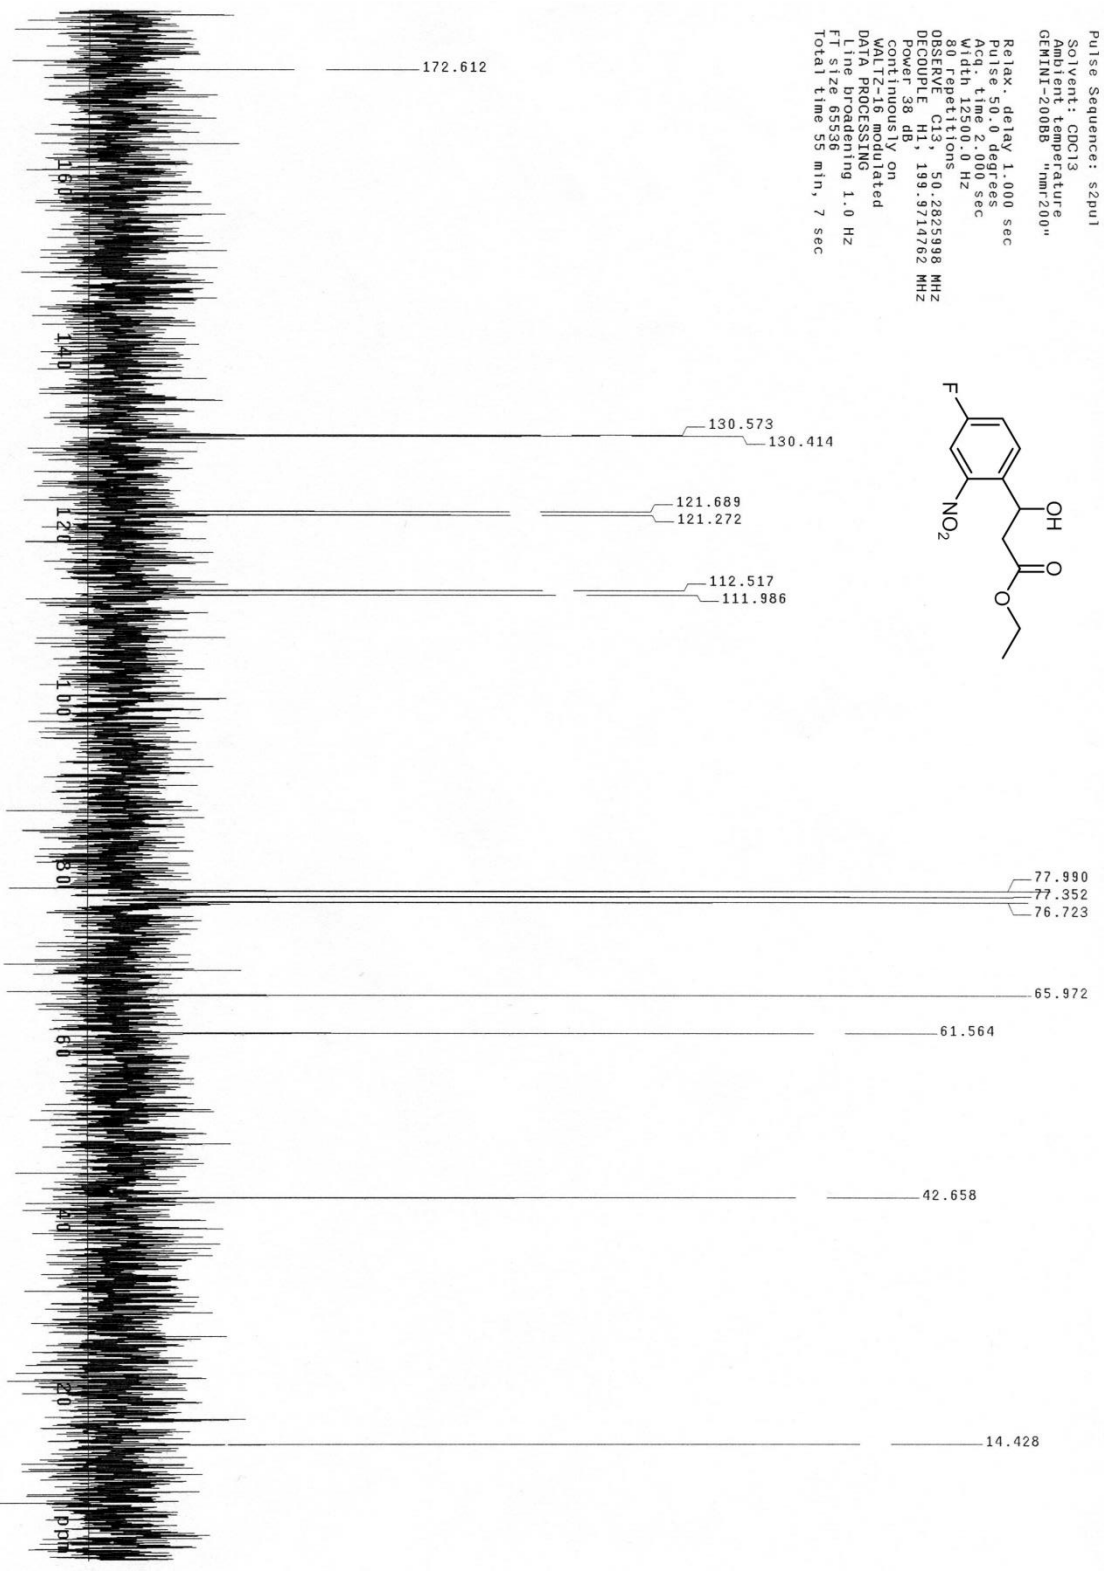





Pulse Sequence: s2pu1  
Solvent: CDCl3  
Ambient temperature  
GEMINI-20088 "nmr200"

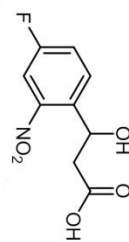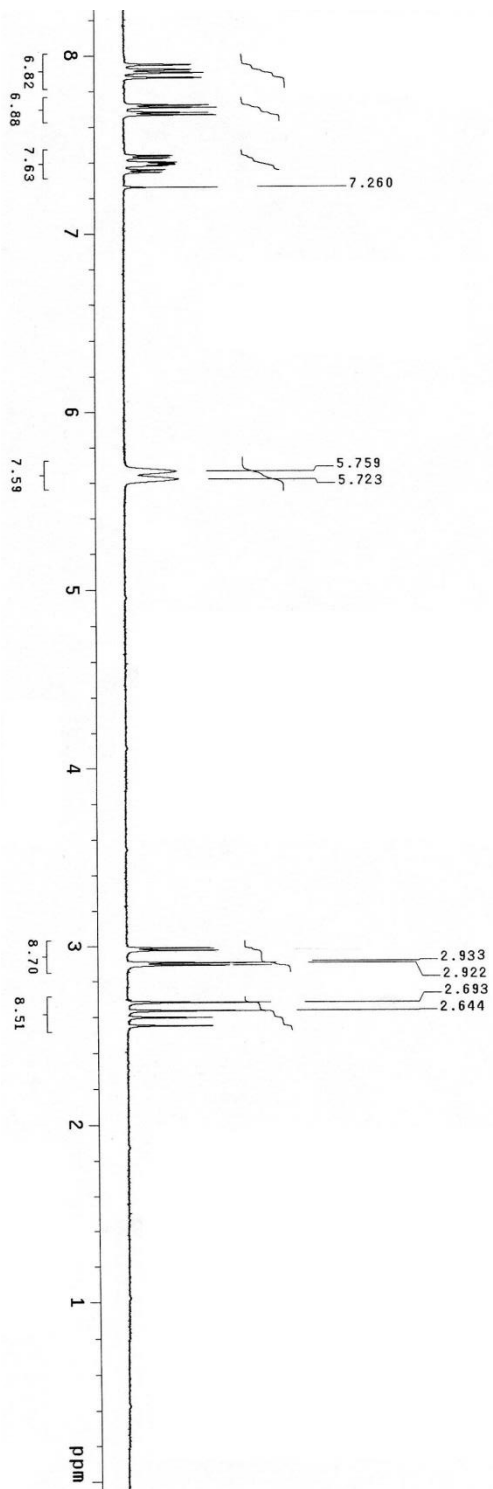

Pulse Sequence: s2pul  
Solvent: CDCl3  
Ambient Temperature  
CEMINTI-2008B "nmr200"

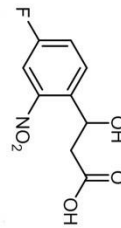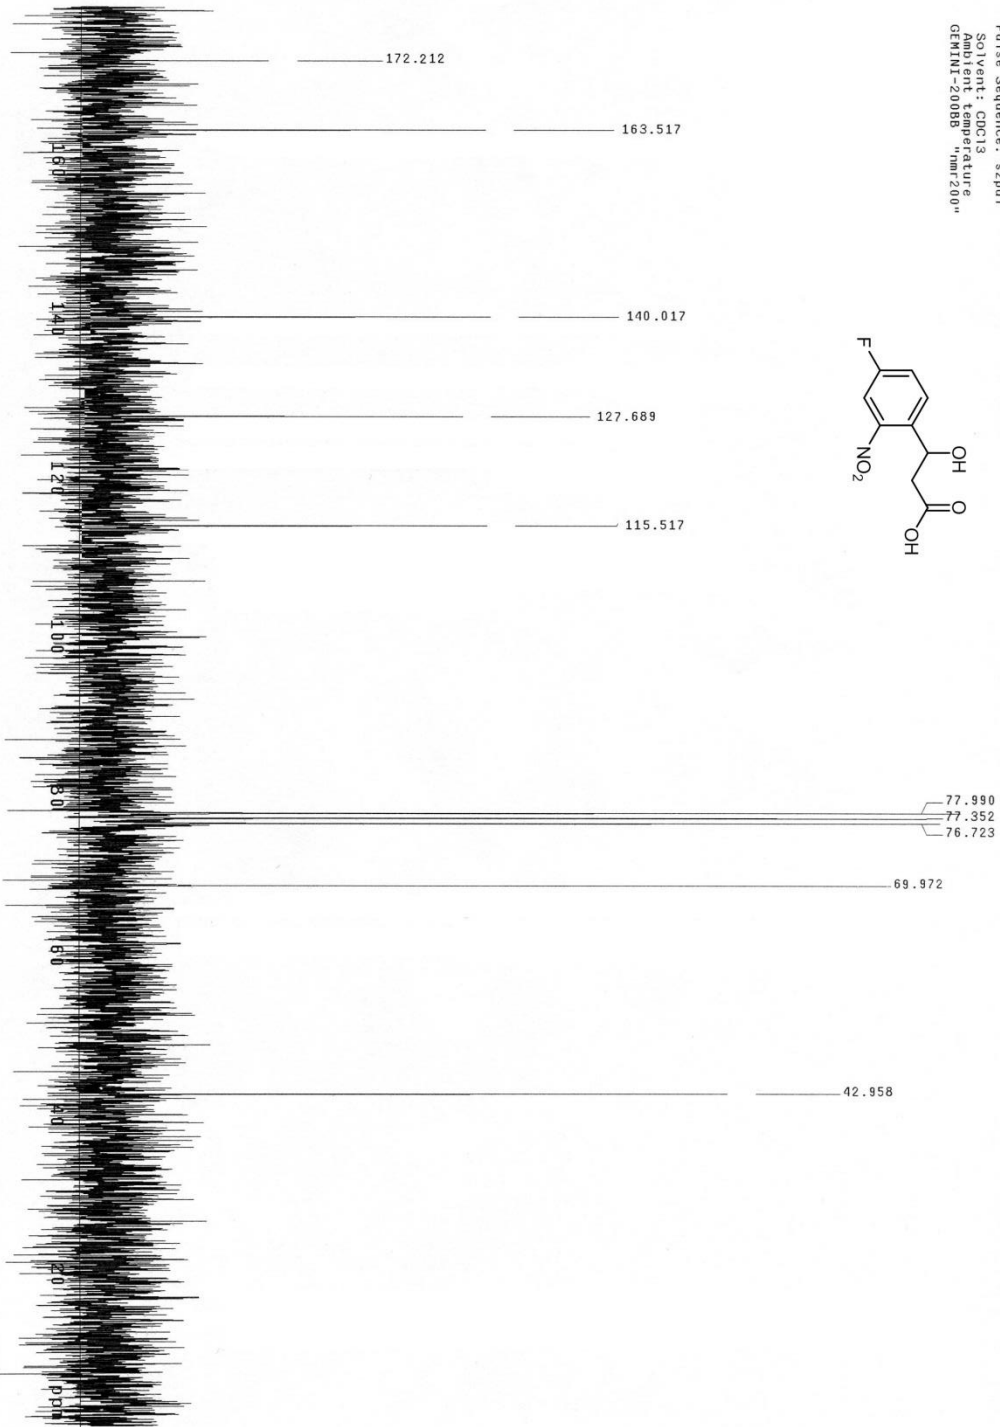

8.5  
8.0  
7.5  
7.0  
6.5  
6.0  
5.5  
5.0  
4.5  
4.0  
3.5  
3.0  
2.5  
2.0  
1.5  
1.0  
0.5  
ppm

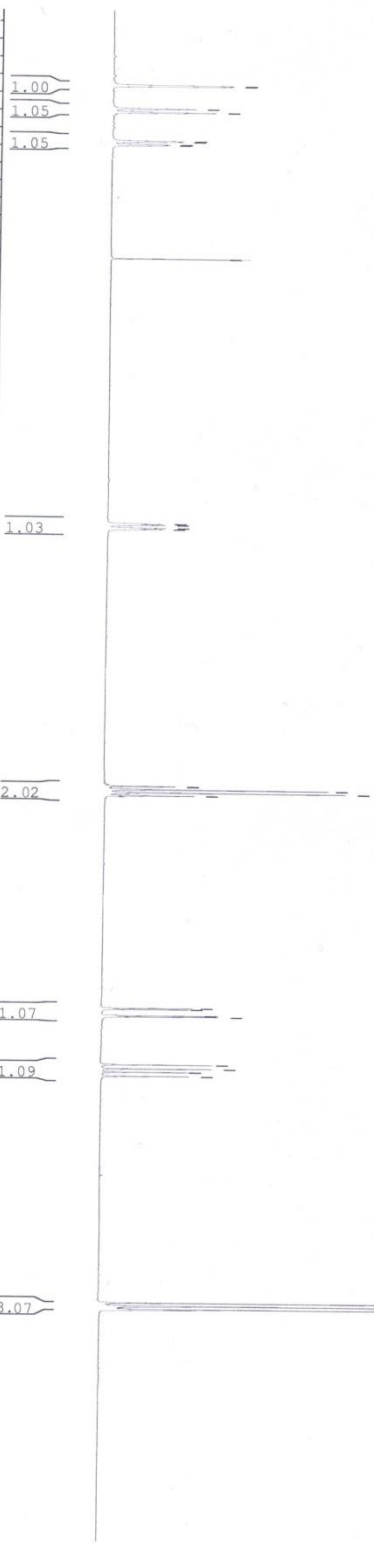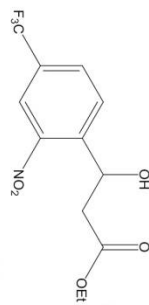

8.241  
8.239  
8.110  
8.089  
7.928  
7.923  
7.907  
7.903  
7.256

5.741  
5.734  
5.717  
5.711

4.245  
4.227  
4.209  
4.191

2.987  
2.980  
2.945  
2.938  
2.666  
2.643  
2.624  
2.601

1.303  
1.285  
1.267



170  
160  
150  
140  
130  
120  
110  
100  
90  
80  
70  
60  
50  
40  
30  
20  
10  
ppm

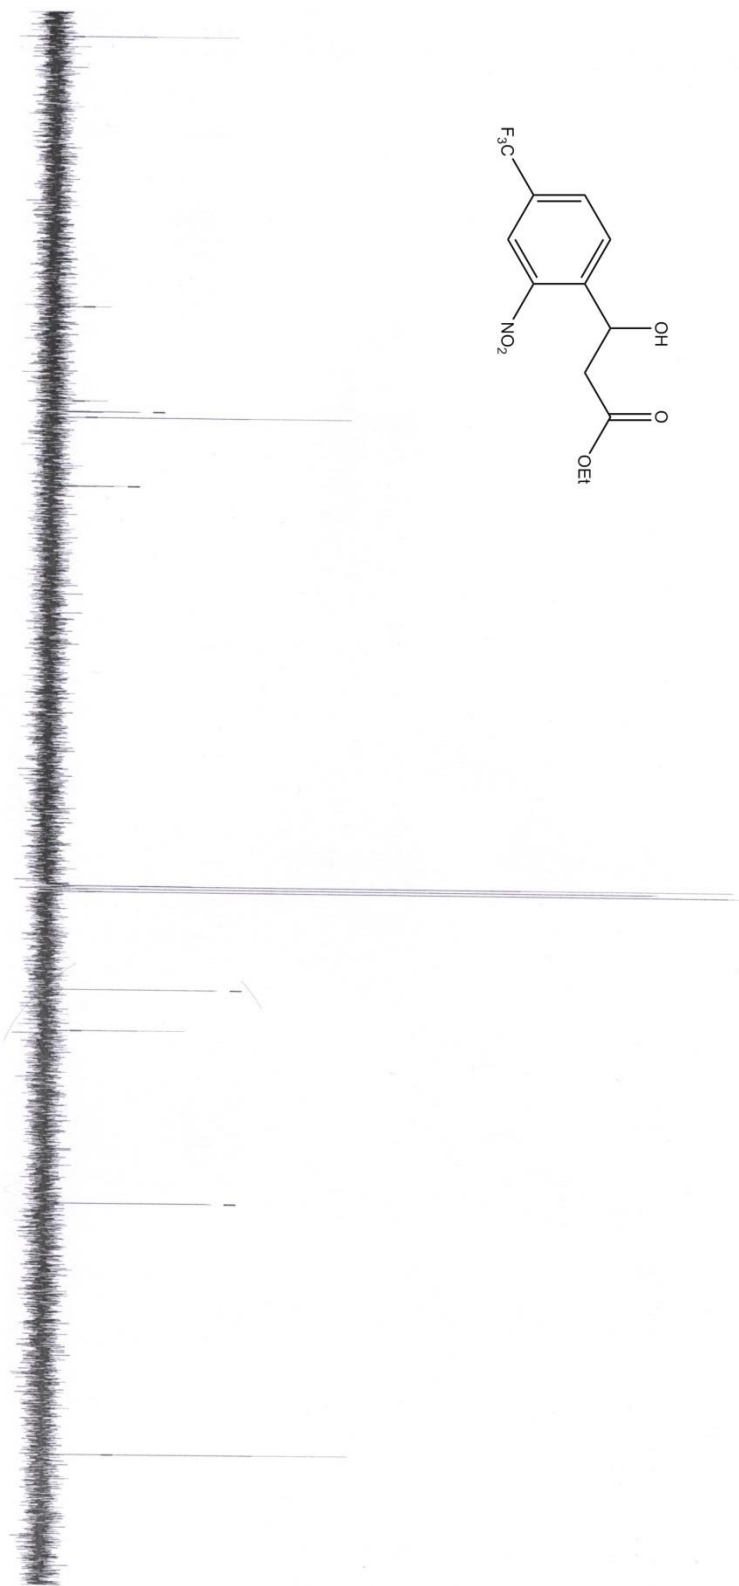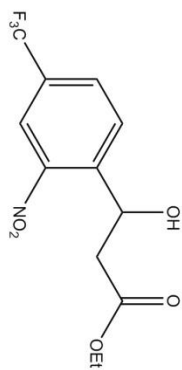

— 172.030

— 141.941

— 131.373

— 130.169

— 129.542

— 121.883

— 121.840

— 65.866

— 61.347

— 42.102

— 14.085

12  
11  
10  
9  
8  
7  
6  
5  
4  
3  
2  
1  
ppm

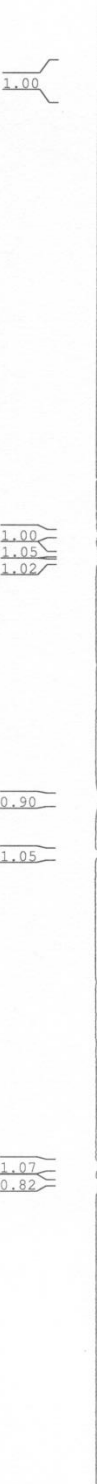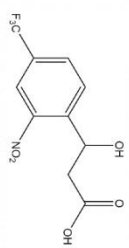

12.345

8.336  
8.333  
8.171  
8.167  
8.151  
8.146  
8.102  
8.082

5.985  
5.517  
5.509  
5.495  
5.487

2.760  
2.751  
2.721  
2.711  
2.602  
2.580  
2.563  
2.540

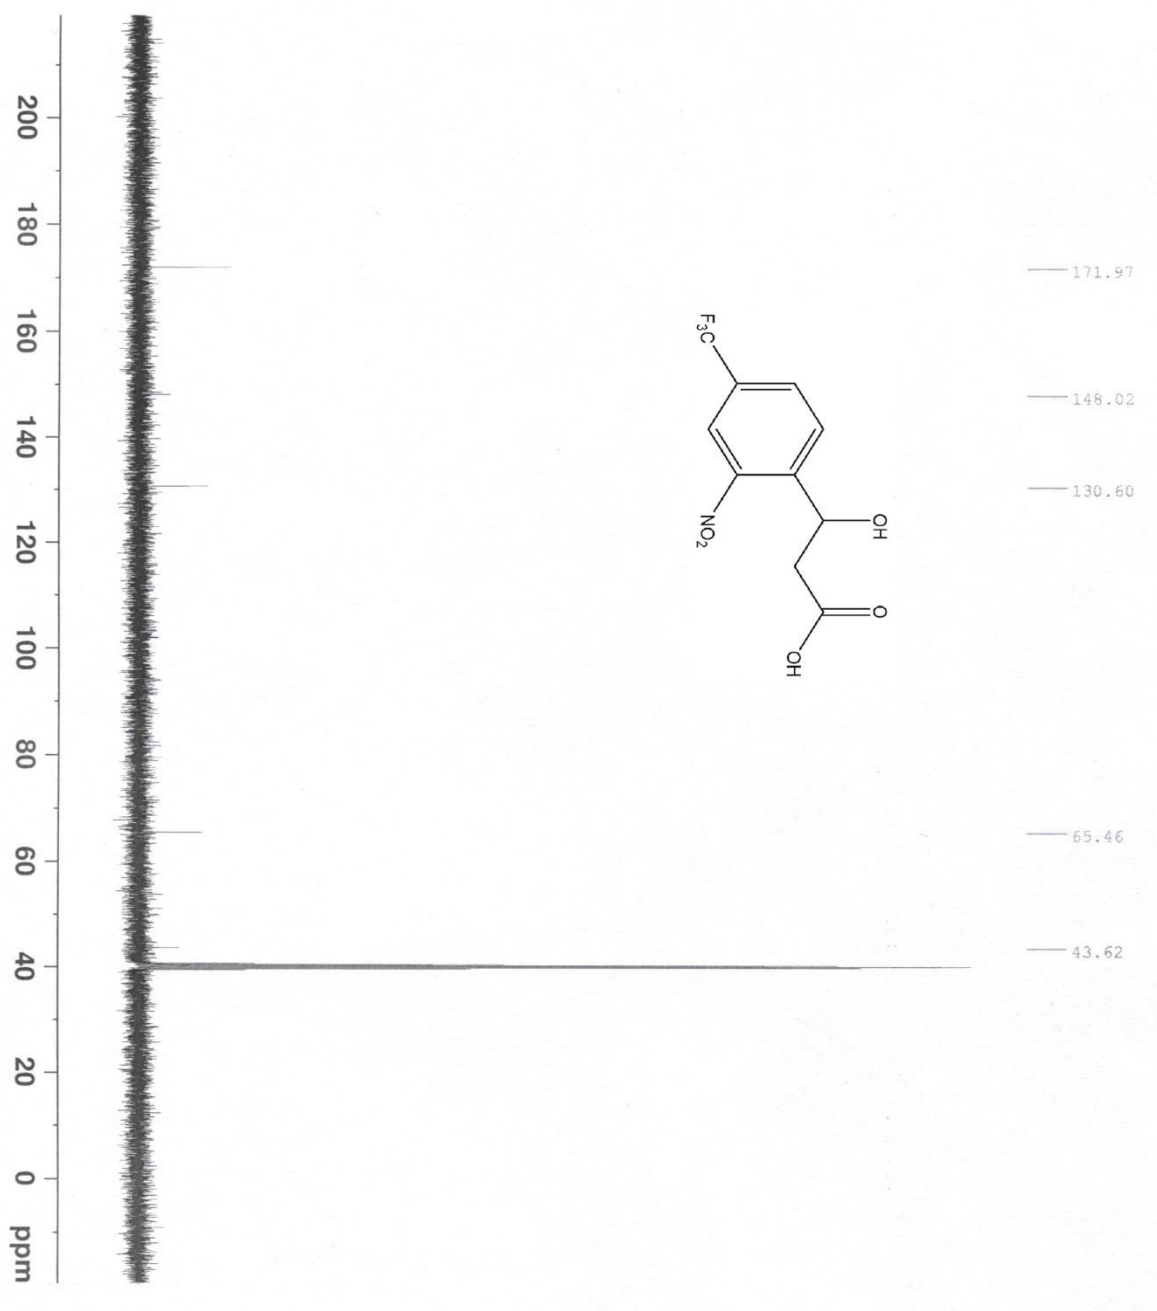

- HPLC tracers for racemic and enantiomerically enriched esters 2a-i:

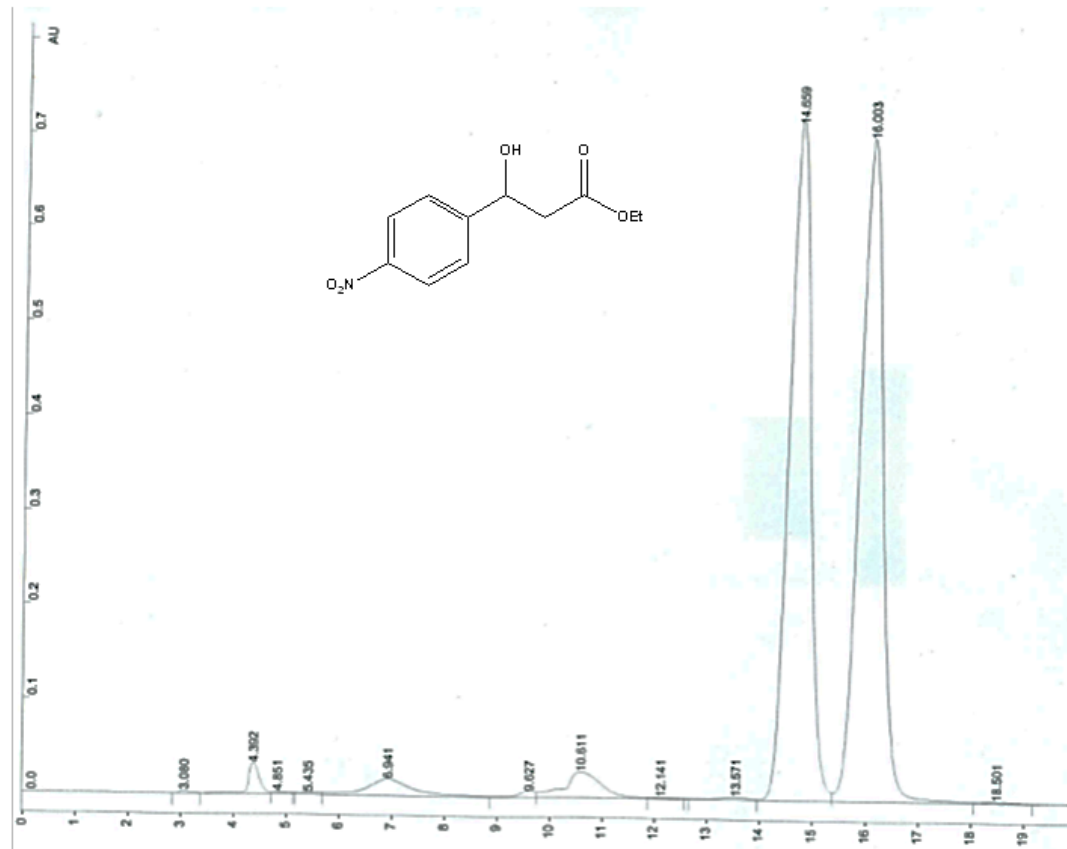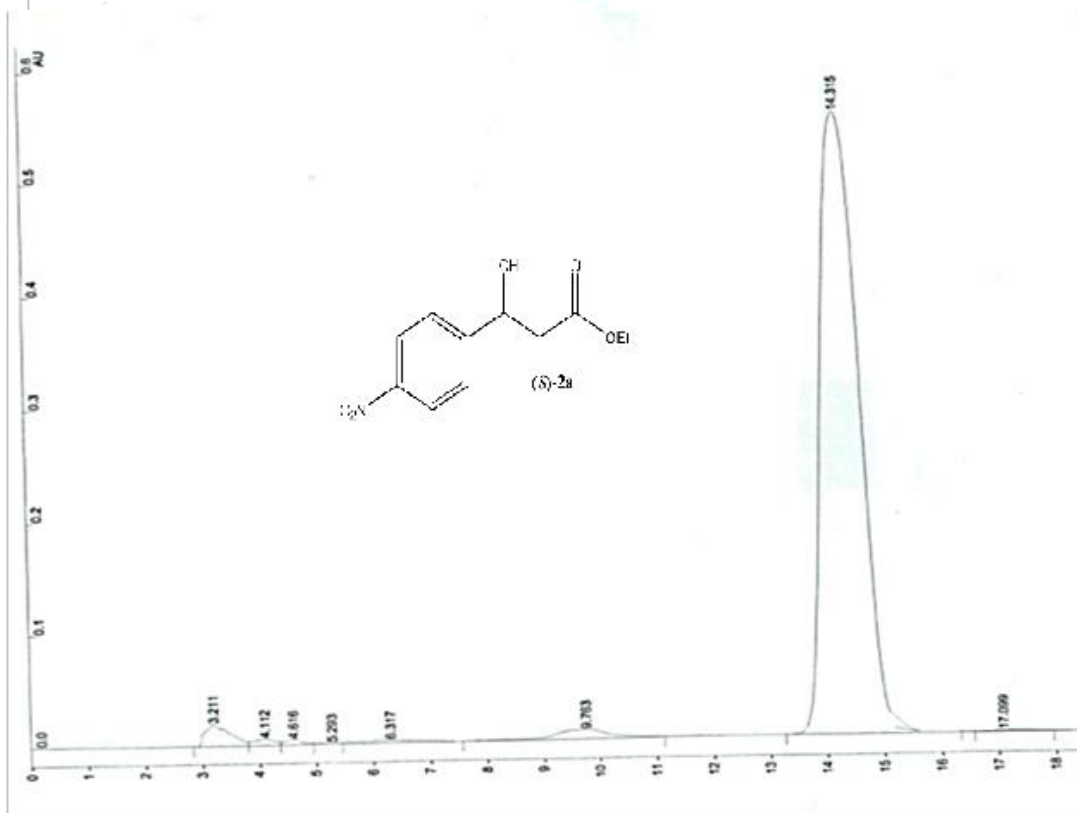



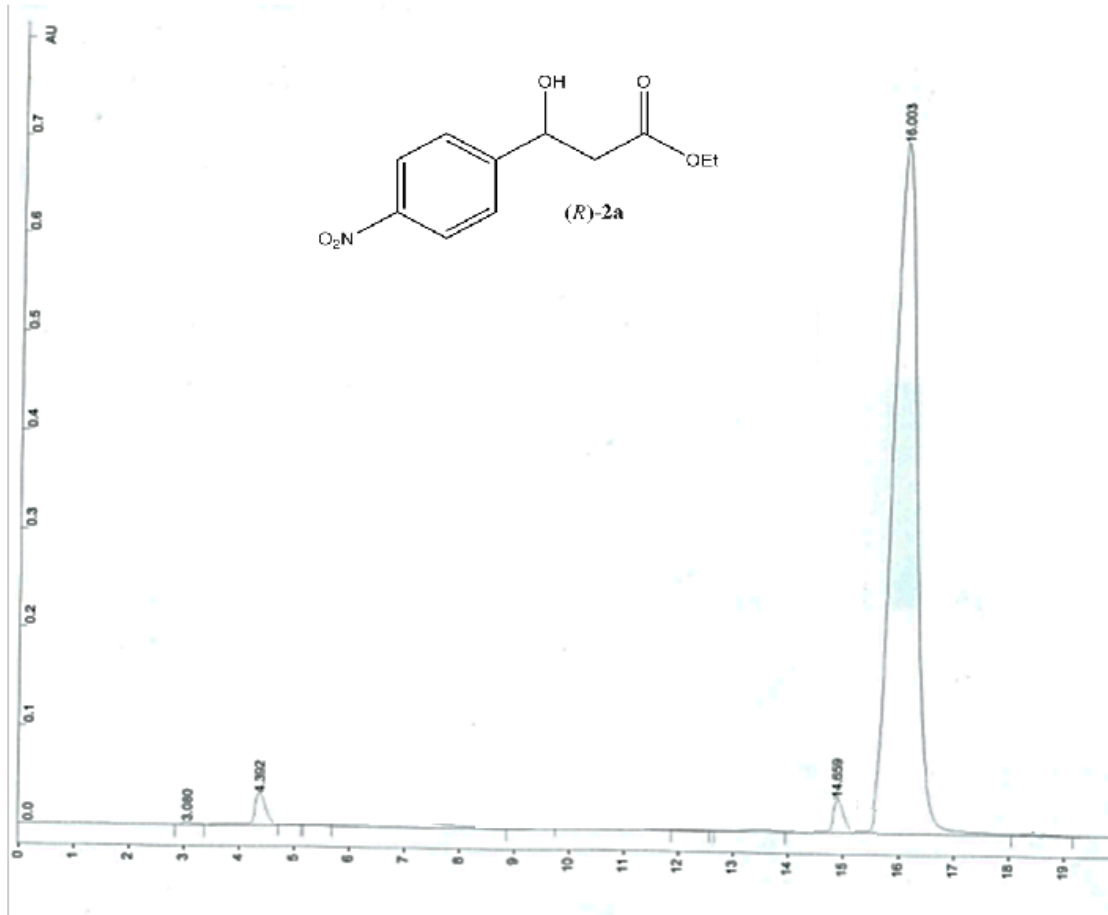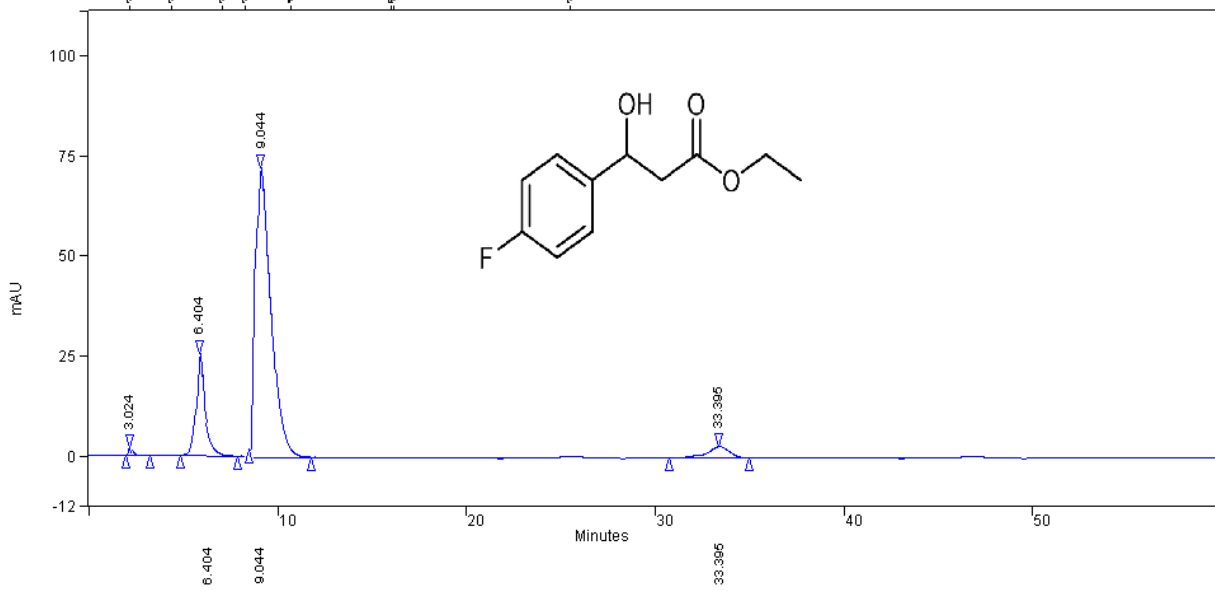

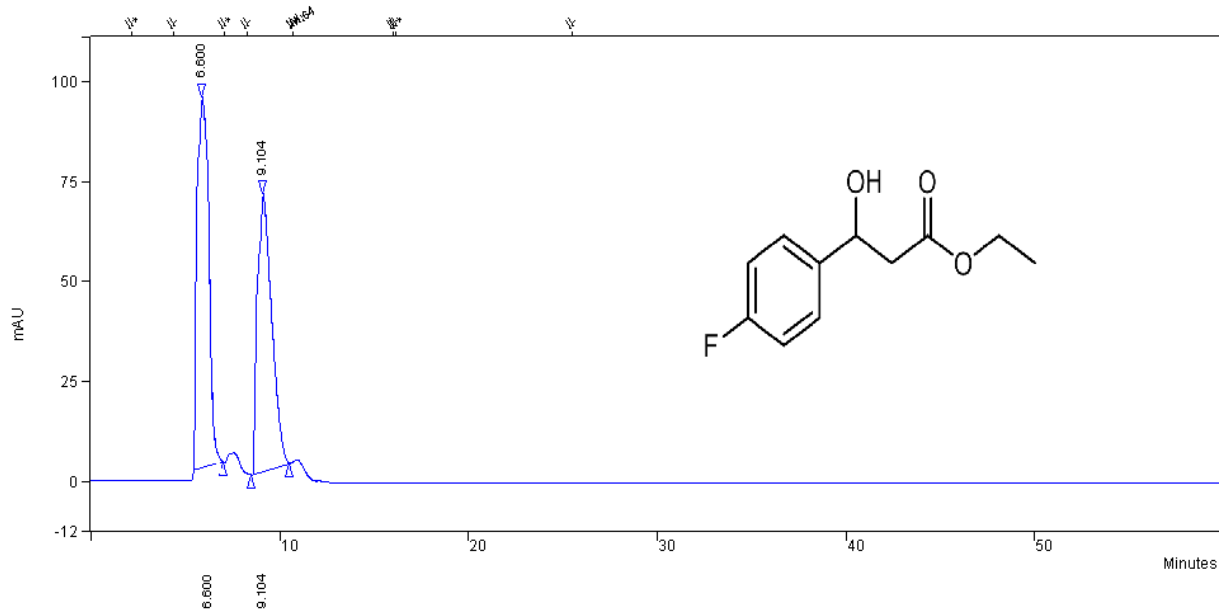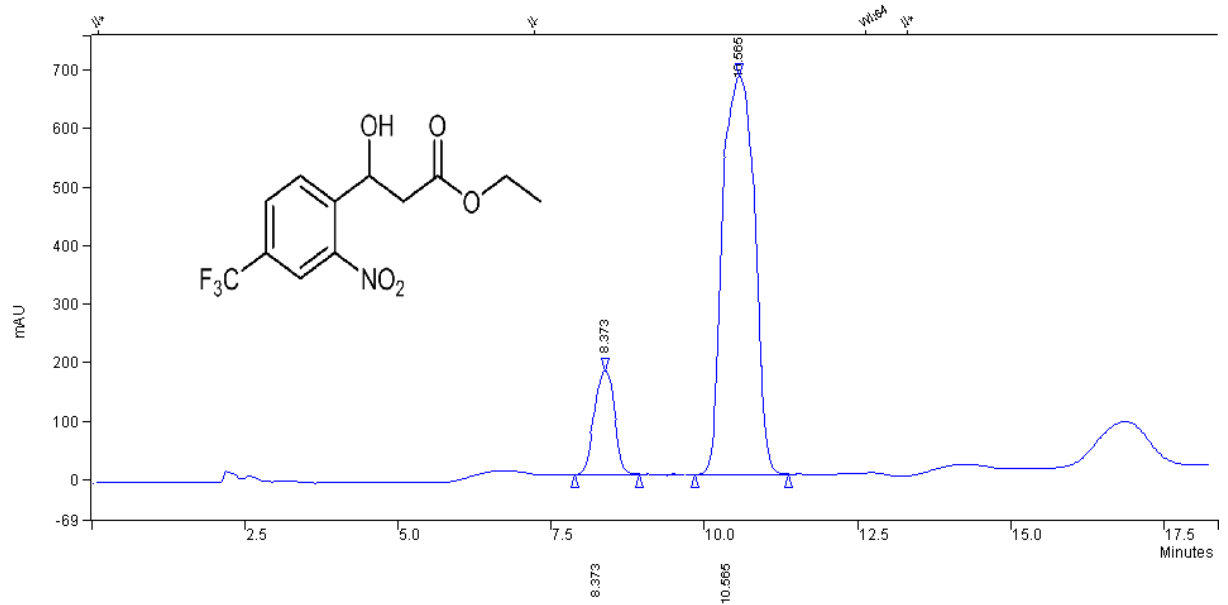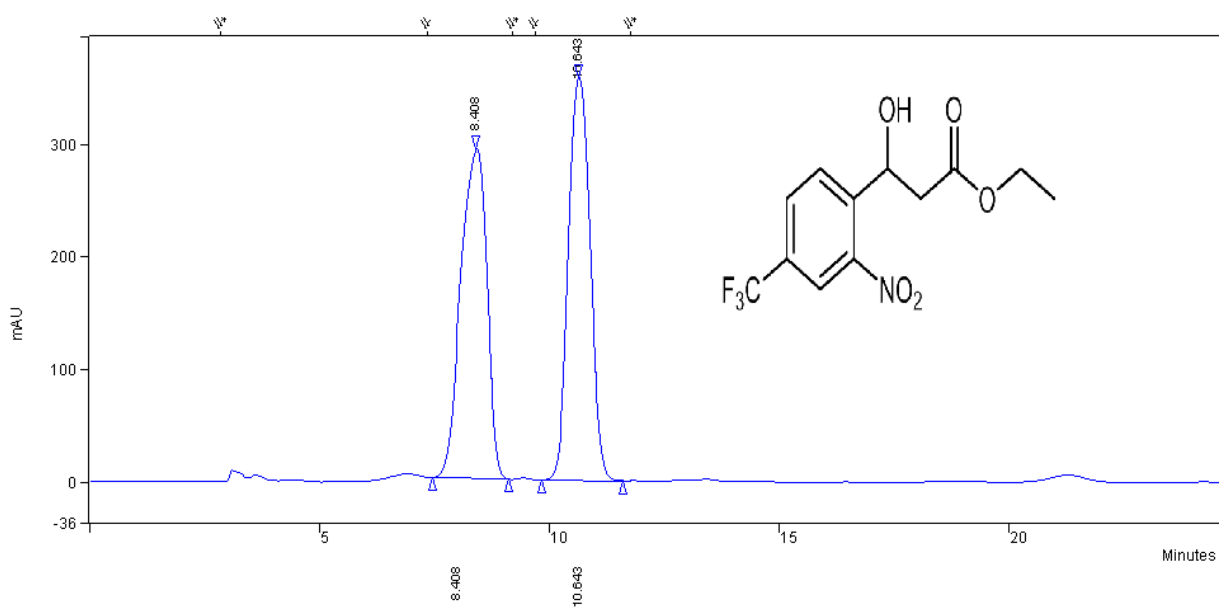

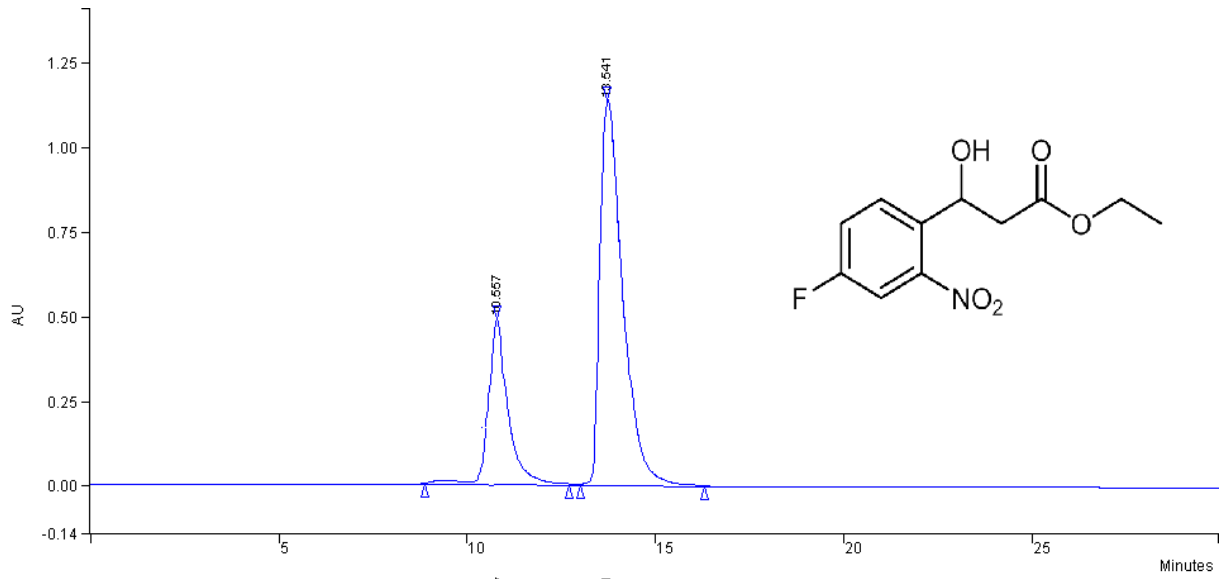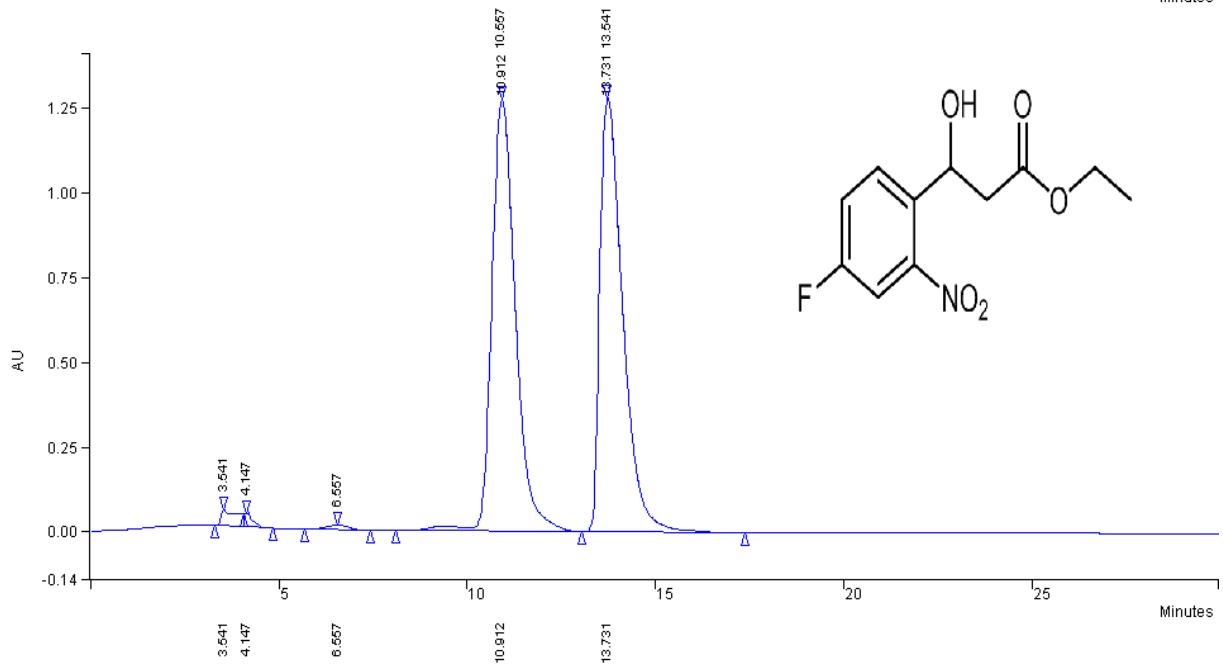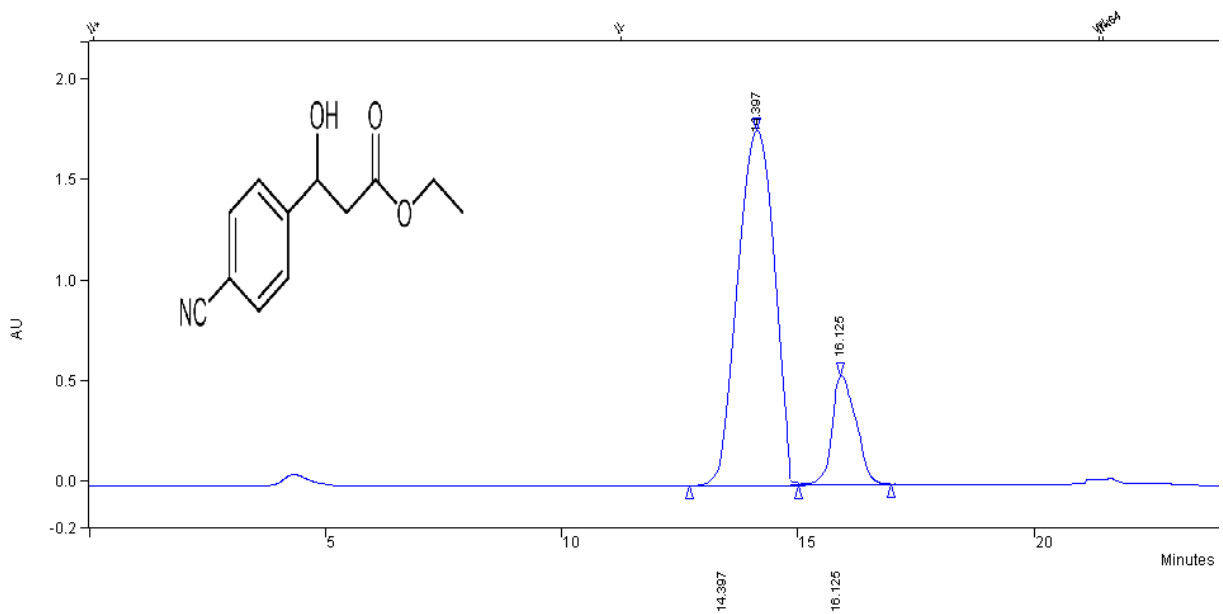

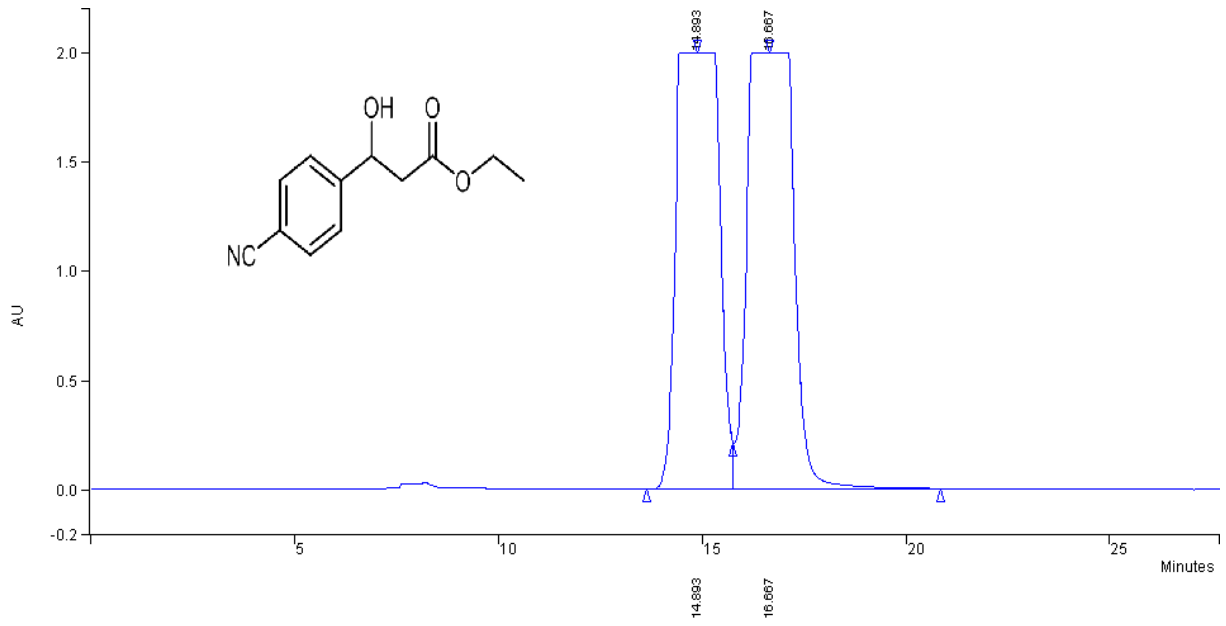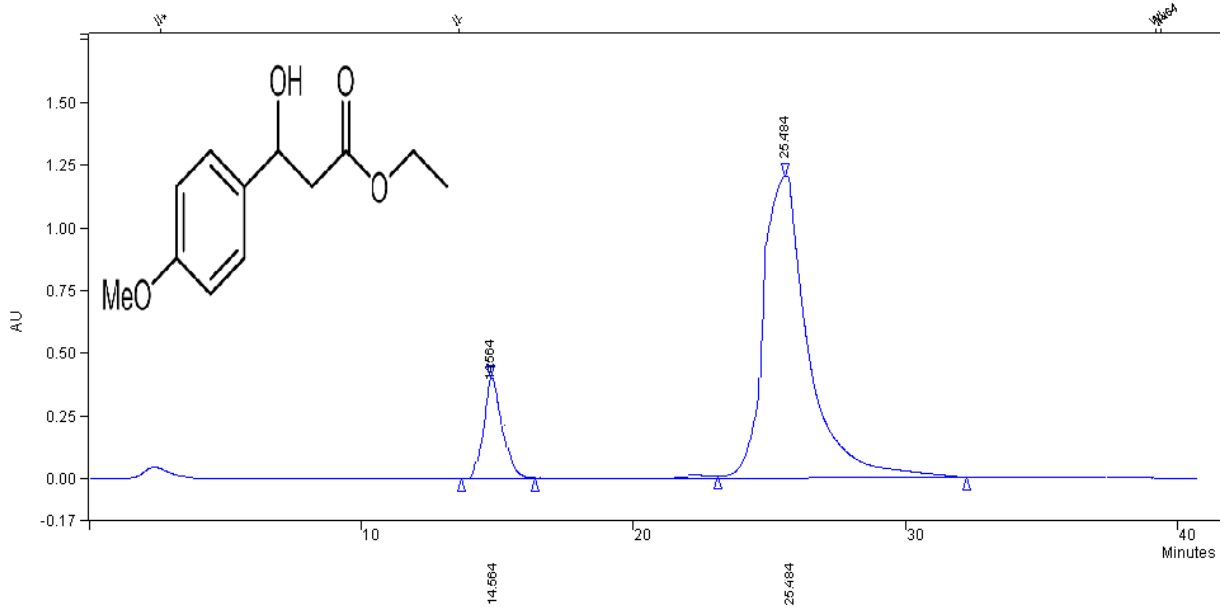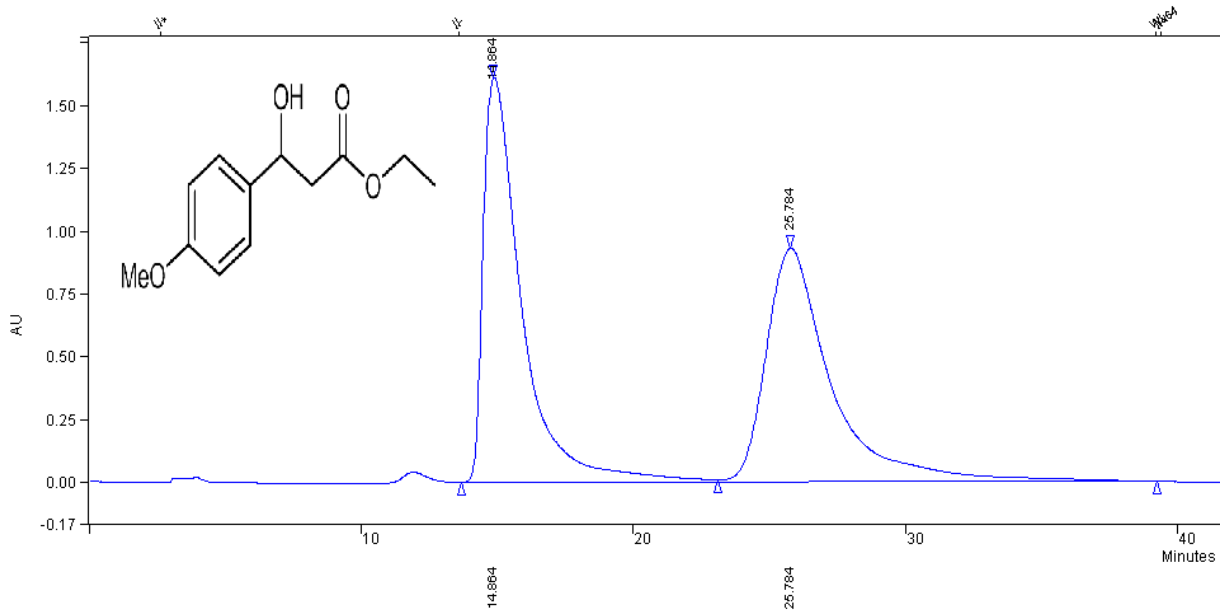

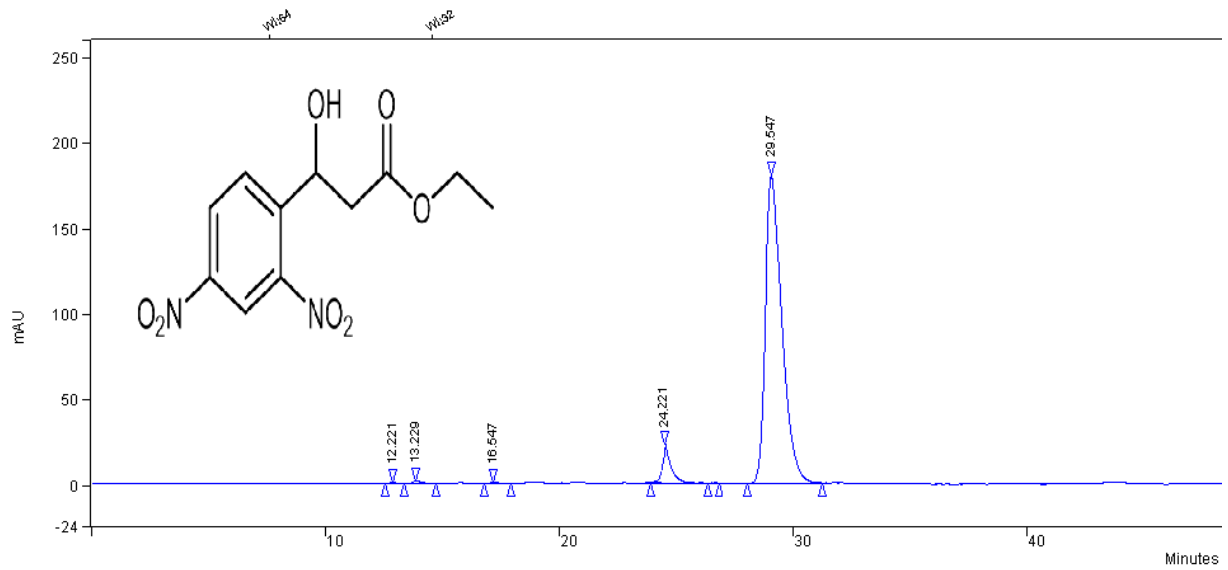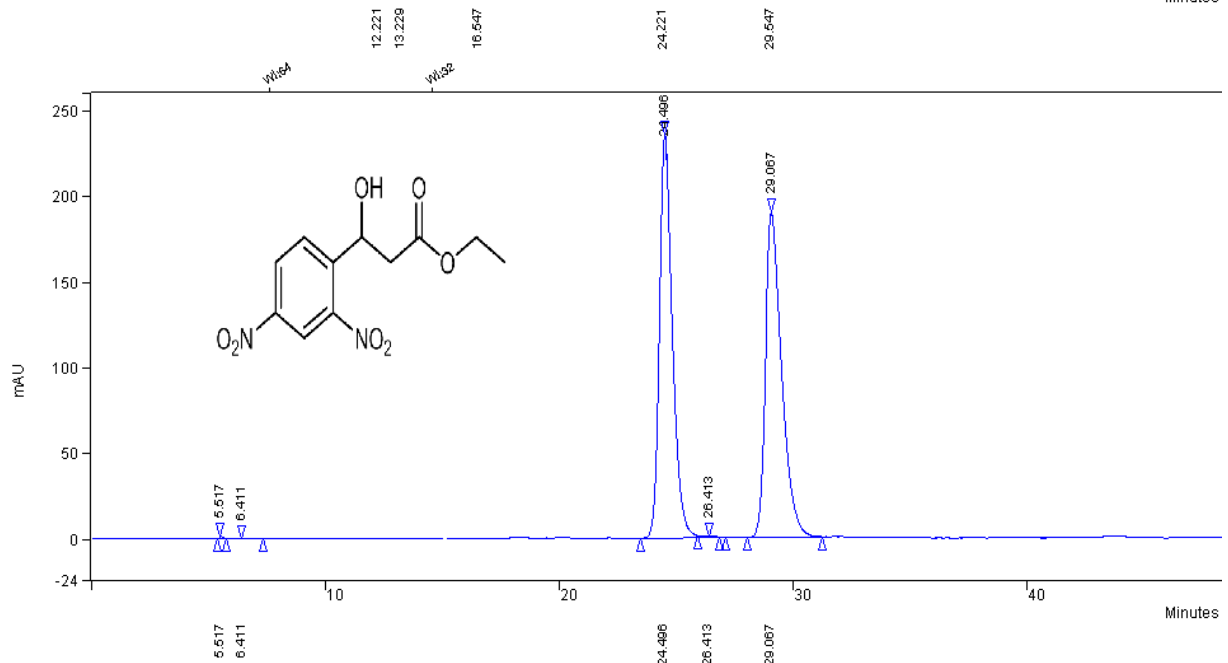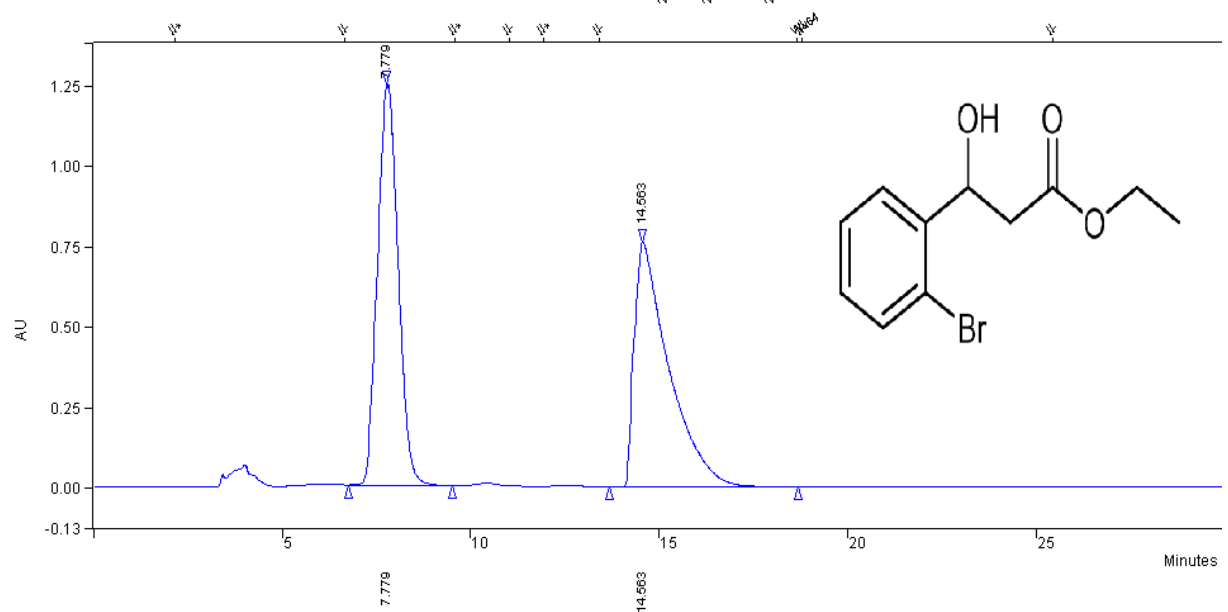

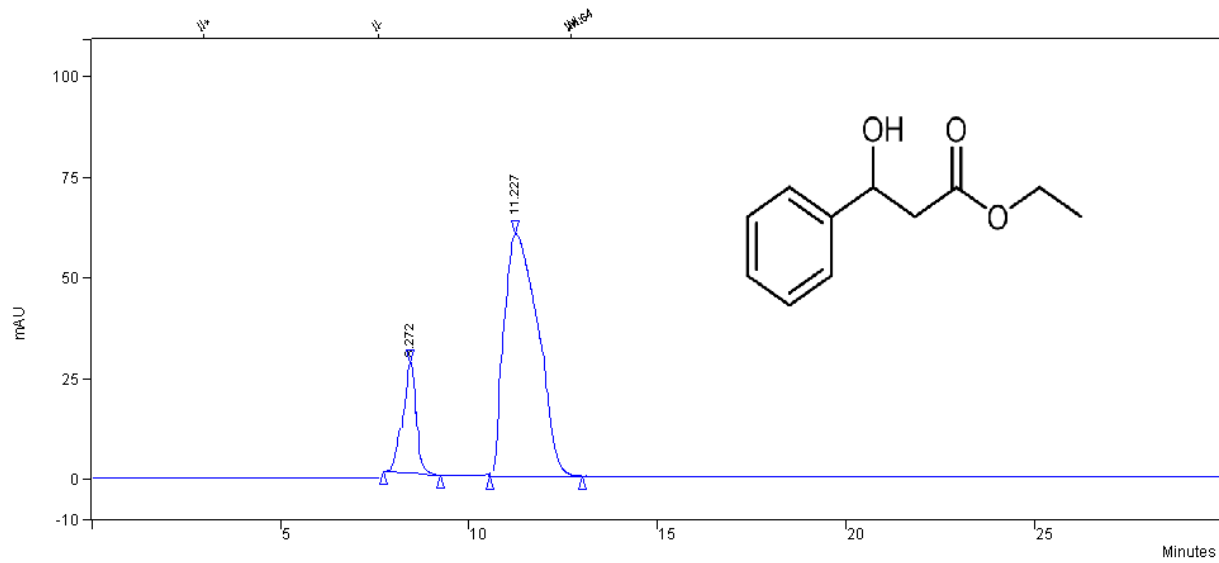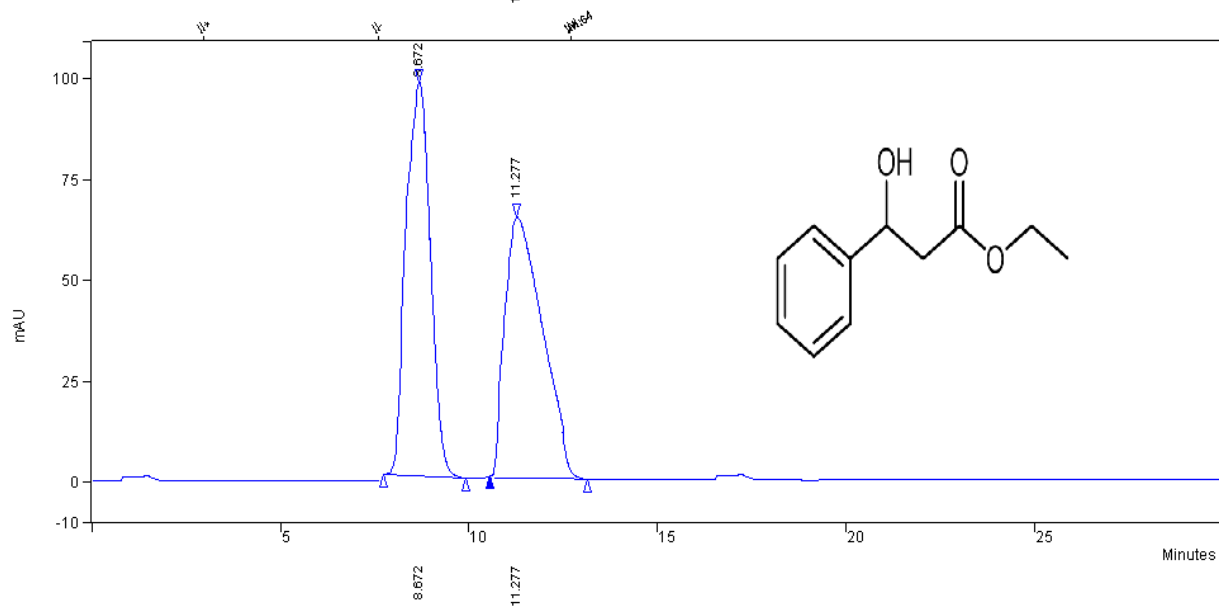

Supplement: c5ob01380a1.pdf [file c5ob01380a1.pdf]
